# Supplementary material for: Immunoproteomic Analysis of Trichinella britovi Proteins Recognized by IgG Antibodies from Meat Juice of Carnivores Naturally Infected with T. britovi
Source: MDPI journal article supplement (doi:10.3390/pathogens11101155), 2022-10-06
Supplement: s1 [file s1]

Table S1. Results of the LC-MS/MS analysis of selected gel fragments for two examined foxes F1 and F2.

| Protein name                                                | Presence in band |    | Mass   | Scores |     | Matches |        | Sequences |        | Coverage |     | Accession number |
|-------------------------------------------------------------|------------------|----|--------|--------|-----|---------|--------|-----------|--------|----------|-----|------------------|
|                                                             | F1               | F2 |        | F1     | F2  | F1      | F2     | F1        | F2     | F1       | F2  |                  |
| 1,5-anhydro-D-fructose reductase                            | -                | A  | 37989  | -      | 360 | -       | 11(11) | -         | 10(10) | -        | 25% | KRY43899.1       |
|                                                             | B                | B  |        | 70     | 64  | 1(1)    | 1(1)   | 1(1)      | 1(1)   | 2%       | 2%  |                  |
| 2,3-bisphosphoglycerate-independent phosphoglycerate mutase | -                | A  | 59212  | -      | 108 | -       | 2(1)   | -         | 2(1)   | -        | 4%  | KRY48325.1       |
|                                                             | B                | B  |        | 117    | 75  | 4(4)    | 1(1)   | 4(4)      | 1(1)   | 8%       | 1%  |                  |
|                                                             | C                | -  |        | 192    | -   | 7(7)    | -      | 7(7)      | -      | 15%      | -   |                  |
| 26S protease regulatory subunit 10B                         | -                | B  | 55162  | -      | 86  | -       | 2(2)   | -         | 2(2)   | -        | 5%  | KRY59566.1       |
| 26S protease regulatory subunit 4, partial                  | B                | B  | 77301  | 194    | 222 | 3(3)    | 6(6)   | 3(3)      | 6(6)   | 7%       | 11% | KRY52921.1       |
| 26S protease regulatory subunit 6B                          | A                | -  | 40507  | 90     | -   | 2(2)    | -      | 2(2)      | -      | 5%       | -   | KRY48180.1       |
| 26S proteasome non-ATPase regulatory subunit 14             | -                | A  | 94857  | -      | 97  | -       | 3(3)   | -         | 3(3)   | -        | 4%  | KRY61535.1       |
| 26S proteasome non-ATPase regulatory subunit 3, partial     | C                | -  | 59673  | 123    | -   | 2(2)    | -      | 2(2)      | -      | 6%       | -   | KRY53037.1       |
| 26S proteasome non-ATPase regulatory subunit 4              | B                | -  | 42698  | 174    | -   | 3(3)    | -      | 2(2)      | -      | 7%       | -   | KRY60873.1       |
| 26S proteasome non-ATPase regulatory subunit 6, partial     | A                | -  | 50950  | 132    | -   | 5(5)    | -      | 5(5)      | -      | 11%      | -   | KRY50659.1       |
|                                                             | -                | B  |        | -      | 76  | -       | 1(1)   | -         | 1(1)   | -        | 2%  |                  |
| 32 kDa beta-galactoside-binding lectin                      | B                | B  | 31910  | 160    | 149 | 4(4)    | 4(4)   | 4(4)      | 4(4)   | 16%      | 17% | KRY59236.1       |
|                                                             | -                | C  |        | -      | 116 | -       | 2(2)   | -         | 2(2)   | -        | 9%  |                  |
| 3-hydroxyisobutyryl-CoA hydrolase, mitochondrial, partial   | -                | A  | 40640  | -      | 64  | -       | 1(1)   | -         | 1(1)   | -        | 3%  | KRY61485.1       |
| 3-ketoacyl-CoA thiolase, mitochondrial                      | A                | A  | 42697  | 1071   | 225 | 29(28)  | 8(8)   | 17(16)    | 8(8)   | 57%      | 23% | KRY51064.1       |
|                                                             | B                | B  |        | 436    | 796 | 12(12)  | 23(23) | 11(11)    | 14(14) | 46%      | 40% |                  |
|                                                             | C                | C  |        | 304    | 154 | 7(7)    | 3(3)   | 7(7)      | 3(3)   | 21%      | 8%  |                  |
| 40S ribosomal protein S18                                   | B                | -  | 26097  | 92     | -   | 1(1)    | -      | 1(1)      | -      | 4%       | -   | KRY55489.1       |
|                                                             | C                | -  |        | 109    | -   | 1(1)    | -      | 1(1)      | -      | 6%       | -   |                  |
| 40S ribosomal protein S3                                    | B                | -  | 38314  | 59     | -   | 1(1)    | -      | 1(1)      | -      | 3%       | -   | KRY60420.1       |
|                                                             | C                | -  |        | 103    | -   | 1(1)    | -      | 1(1)      | -      | 2%       | -   |                  |
| 40S ribosomal protein S5, partial                           | A                | -  | 24818  | 68     | -   | 1(1)    | -      | 1(1)      | -      | 4%       | -   | KRY49420.1       |
|                                                             | C                | -  |        | 60     | -   | 1(1)    | -      | 1(1)      | -      | 4%       | -   |                  |
| 40S ribosomal protein S8                                    | B                | -  | 72413  | 120    | -   | 2(2)    | -      | 2(2)      | -      | 4%       | -   | KRY60196.1       |
| 40S ribosomal protein S9                                    | C                | -  | 26490  | 64     | -   | 1(1)    | -      | 1(1)      | -      | 4%       | -   | KRY47012.1       |
| 4-hydroxybutyrate coenzyme A transferase, partial           | A                | A  | 53804  | 102    | 82  | 3(3)    | 1(1)   | 3(3)      | 1(1)   | 5%       | 2%  | KRY56869.1       |
|                                                             | B                | B  |        | 393    | 66  | 12(12)  | 1(1)   | 12(12)    | 1(1)   | 24%      | 2%  |                  |
|                                                             | C                | -  |        | 104    | -   | 2(2)    | -      | 2(2)      | -      | 4%       | -   |                  |
| 60 kDa heat shock protein, mitochondrial                    | A                | A  | 158357 | 364    | 63  | 10(10)  | 1(1)   | 10(10)    | 1(1)   | 8%       | 0%  | KRY51676.1       |
|                                                             | B                | B  |        | 454    | 119 | 13(12)  | 4(4)   | 13(12)    | 4(4)   | 10%      | 3%  |                  |
|                                                             | C                | C  |        | 1224   | 284 | 26(26)  | 7(6)   | 19(19)    | 7(6)   | 18%      | 6%  |                  |
| 60 kDa SS-A/Ro ribonucleoprotein, partial                   | C                | -  | 69458  | 142    | -   | 3(3)    | -      | 3(3)      | -      | 5%       | -   | KRY47029.1       |
| 60S acidic ribosomal protein P0                             | B                | -  | 32092  | 142    | -   | 2(2)    | -      | 2(2)      | -      | 9%       | -   | KRY54528.1       |
|                                                             | C                | C  |        | 95     | 103 | 2(2)    | 1(1)   | 2(2)      | 1(1)   | 8%       | 5%  |                  |
| 60S ribosomal protein L17, partial                          | B                | -  | 146568 | 69     | -   | 1(1)    | -      | 1(1)      | -      | 0%       | -   | KRY50982.1       |
| 60S ribosomal protein L18a                                  | B                | -  | 22864  | 82     | -   | 2(2)    | -      | 2(2)      | -      | 9%       | -   | KRY60168.1       |
| 60S ribosomal protein L21, partial                          | B                | -  | 19610  | 57     | -   | 1(1)    | -      | 1(1)      | -      | 9%       | -   | KRY48279.1       |

| Protein name                                                | Presence in band |   | Mass   | Scores |     | Matches |      | Sequences |      | Coverage |     | Accession number |
|-------------------------------------------------------------|------------------|---|--------|--------|-----|---------|------|-----------|------|----------|-----|------------------|
| 60S ribosomal protein L3                                    | A                | - | 34644  | 90     | -   | 4(4)    | -    | 3(3)      | -    | 9%       | -   | KRY46416.1       |
|                                                             | B                | - |        | 70     | -   | 2(2)    | -    | 2(2)      | -    | 5%       | -   |                  |
|                                                             | C                | - |        | 70     | -   | 1(1)    | -    | 1(1)      | -    | 3%       | -   |                  |
| 60S ribosomal protein L4                                    | -                | A | 31108  | -      | 76  | -       | 1(1) | -         | 1(1) | -        | 6%  | KRY61057.1       |
|                                                             | C                | - |        | 68     | -   | 2(1)    | -    | 2(1)      | -    | 5%       | -   |                  |
| 60S ribosomal protein L4-B, partial                         | C                | - | 43559  | 68     | -   | 2(1)    | -    | 2(1)      | -    | 4%       | -   | KRY61056.1       |
| Acetyl-CoA acetyltransferase, mitochondrial                 | A                | - | 43775  | 59     | -   | 1(0)    | -    | 1(0)      | -    | 2%       | -   | KRY60246.1       |
| Actin-interacting protein 1                                 | B                | - | 71319  | 122    | -   | 2(2)    | -    | 2(2)      | -    | 4%       | -   | KRY51005.1       |
|                                                             | C                | C |        | 390    | 126 | 13(13)  | 2(2) | 12(12)    | 2(2) | 23%      | 3%  |                  |
| Actin-like protein 6A                                       | B                | - | 120874 | 60     | -   | 1(1)    | -    | 1(1)      | -    | 0%       | -   | KRY56723.1       |
| Actin-related protein 2, partial                            | -                | B | 155475 | -      | 75  | -       | 1(1) | -         | 1(1) | -        | 0%  | KRY53921.1       |
| Actin-related protein 2/3 complex subunit 2                 | A                | - | 132079 | 158    | -   | 6(6)    | -    | 6(6)      | -    | 5%       | -   | KRY56438.1       |
|                                                             | B                | B |        | 104    | 114 | 1(1)    | 3(3) | 1(1)      | 3(3) | 1%       | 2%  |                  |
| Actin-related protein 3                                     | B                | - | 128876 | 61     | -   | 1(1)    | -    | 1(1)      | -    | 1%       | -   | KRY47903.1       |
| Acyl-CoA synthetase family member 2, mitochondrial, partial | -                | C | 67058  | -      | 63  | -       | 1(1) | -         | 1(1) | -        | 2%  | KRY51298.1       |
| Adducin-related protein 1                                   | A                | - | 80242  | 63     | -   | 1(1)    | -    | 1(1)      | -    | 1%       | -   | KRY47021.1       |
|                                                             | B                | - |        | 177    | -   | 4(4)    | -    | 4(4)      | -    | 6%       | -   |                  |
|                                                             | C                | C |        | 107    | 67  | 2(2)    | 1(1) | 2(2)      | 1(1) | 3%       | 1%  |                  |
| Adenylosuccinate lyase                                      | A                | - | 185820 | 129    | -   | 1(1)    | -    | 1(1)      | -    | 0%       | -   | KRY47589.1       |
|                                                             | B                | B |        | 1107   | 70  | 32(32)  | 1(1) | 20(20)    | 1(1) | 12%      | 0%  |                  |
|                                                             | -                | C |        | -      | 59  | -       | 1(1) | -         | 1(1) | -        | 0%  |                  |
| Adenylosuccinate synthetase, partial                        | A                | - | 50894  | 101    | -   | 2(2)    | -    | 2(2)      | -    | 4%       | -   | KRY50054.1       |
|                                                             | B                | B |        | 220    | 126 | 5(5)    | 2(2) | 5(5)      | 2(2) | 28%      | 4%  |                  |
|                                                             | C                | - |        | 70     | -   | 1(1)    | -    | 1(1)      | -    | 2%       | -   |                  |
| Adenylyl cyclase-associated protein 2                       | B                | - | 88901  | 136    | -   | 3(3)    | -    | 3(3)      | -    | 5%       | -   | KRY58311.1       |
| ADP-ribose pyrophosphatase, mitochondrial                   | A                | - | 55423  | 66     | -   | 1(1)    | -    | 1(1)      | -    | 2%       | -   | KRY57225.1       |
|                                                             | B                | - | 58846  | 102    | -   | 1(1)    | -    | 1(1)      | -    | 2%       | -   | KRY48334.1       |
|                                                             | -                | C |        | -      | 95  | -       | 1(1) | -         | 1(1) | -        | 2%  |                  |
|                                                             | -                | A | 37863  | -      | 77  | -       | 2(2) | -         | 2(2) | -        | 5%  | KRY49532.1       |
|                                                             | -                | B | 55835  | -      | 118 | -       | 2(2) | -         | 2(2) | -        | 5%  | KRY50360.1       |
| Alanine aminotransferase 2                                  | A                | - | 63694  | 91     | -   | 1(1)    | -    | 1(1)      | -    | 2%       | -   | KRY55706.1       |
|                                                             | B                | B |        | 183    | 83  | 3(2)    | 1(1) | 3(2)      | 1(1) | 8%       | 2%  |                  |
|                                                             | C                | C |        | 97     | 157 | 1(1)    | 3(3) | 1(1)      | 3(3) | 2%       | 5%  |                  |
| Aldehyde dehydrogenase, mitochondrial                       | C                | C | 94777  | 102    | 244 | 1(1)    | 7(7) | 1(1)      | 7(7) | 2%       | 11% | KRY52913.1       |
| Alpha-L-fucosidase                                          | A                | - | 55241  | 73     | -   | 2(2)    | -    | 2(2)      | -    | 4%       | -   | KRY54685.1       |
|                                                             | B                | B |        | 101    | 69  | 3(3)    | 2(1) | 3(3)      | 2(1) | 6%       | 4%  |                  |
| Aminomethyltransferase, mitochondrial                       | -                | B | 100050 | -      | 111 | -       | 3(3) | -         | 3(3) | -        | 3%  | KRY54143.1       |
| Aminopeptidase N                                            | -                | B | 109166 | -      | 69  | -       | 1(1) | -         | 1(1) | -        | 1%  | KRY54999.1       |
| Ankyrin-2, partial                                          | B                | - | 821521 | 70     | -   | 1(1)    | -    | 1(1)      | -    | 0%       | -   | KRY56996.1       |
| AP-2 complex subunit alpha-2                                | C                | - | 106493 | 80     | -   | 1(1)    | -    | 1(1)      | -    | 1%       | -   | KRY60602.1       |
| AP-2 complex subunit beta                                   | C                | - | 106080 | 74     | -   | 2(2)    | -    | 2(2)      | -    | 2%       | -   | KRY52390.1       |
| Arrestin domain-containing protein 3, partial               | B                | - | 64593  | 111    | -   | 2(2)    | -    | 2(2)      | -    | 5%       | -   | KRY54875.1       |

| Protein name                                                   | Presence in band |   | Mass   | Scores |     | Matches |        | Sequences |        | Coverage |     | Accession number |
|----------------------------------------------------------------|------------------|---|--------|--------|-----|---------|--------|-----------|--------|----------|-----|------------------|
| Aspartate aminotransferase, mitochondrial, partial             | A                | - | 47470  | 110    | -   | 2(2)    | -      | 2(2)      | -      | 5%       | -   | KRY49869.1       |
|                                                                | C                | - |        | 76     | -   | 1(1)    | -      | 1(1)      | -      | 2%       | -   |                  |
|                                                                | -                | B |        | -      | 115 | -       | 1(1)   | -         | 1(1)   | -        | 3%  |                  |
| Aspartate--tRNA ligase, cytoplasmic                            | B                | - | 57949  | 165    | -   | 3(3)    | -      | 3(3)      | -      | 7%       | -   | KRY49144.1       |
|                                                                | C                | C |        | 86     | 163 | 1(1)    | 5(5)   | 1(1)      | 5(5)   | 1%       | 11% |                  |
| Aspartyl aminopeptidase                                        | A                | - | 52372  | 67     | -   | 1(1)    | -      | 1(1)      | -      | 2%       | -   | KRY46829.1       |
|                                                                | B                | - |        | 382    | -   | 8(8)    | -      | 7(7)      | -      | 20%      | -   |                  |
| Atlastin-2                                                     | C                | - | 68364  | 212    | -   | 4(4)    | -      | 4(4)      | -      | 10%      | -   | KRY58631.1       |
| ATP synthase subunit alpha, mitochondrial, partial             | A                | A | 64231  | 71     | 71  | 2(2)    | 1(1)   | 2(2)      | 1(1)   | 4%       | 1%  | KRY49394.1       |
|                                                                | B                | B |        | 197    | 125 | 4(4)    | 2(2)   | 4(4)      | 2(2)   | 8%       | 4%  |                  |
|                                                                | C                | C |        | 123    | 308 | 2(2)    | 11(11) | 2(2)      | 9(9)   | 5%       | 14% |                  |
| ATPase asna1                                                   | -                | A | 40013  | -      | 101 | -       | 2(2)   | -         | 2(2)   | -        | 5%  | KRY53402.1       |
| ATP-dependent RNA helicase DDX19A, partial                     | B                | - | 114761 | 89     | -   | 2(2)    | -      | 2(2)      | -      | 2%       | -   | KRY47762.1       |
| BRCA1-A complex subunit BRE, partial                           | B                | - | 52274  | 68     | -   | 1(1)    | -      | 1(1)      | -      | 2%       | -   | KRY48007.1       |
| Breast cancer anti-estrogen resistance protein 1, partial      | A                | A | 131710 | 76     | 91  | 1(1)    | 1(1)   | 1(1)      | 1(1)   | 0%       | 0%  | KRY51653.1       |
|                                                                | -                | B |        | -      | 77  | -       | 1(1)   | -         | 1(1)   | -        | 0%  |                  |
| C-1-tetrahydrofolate synthase, cytoplasmic                     | A                | - | 125620 | 69     | -   | 1(1)    | -      | 1(1)      | -      | 0%       | -   | KRY60034.1       |
| Calpain clp-1                                                  | A                | - | 150994 | 85     | -   | 1(1)    | -      | 1(1)      | -      | 0%       | -   | KRY60775.1       |
|                                                                | B                | - |        | 106    | -   | 2(2)    | -      | 2(2)      | -      | 1%       | -   |                  |
|                                                                | C                | C |        | 208    | 66  | 11(10)  | 1(1)   | 9(9)      | 1(1)   | 7%       | 0%  |                  |
| Calponin -like protein OV9M, partial                           | A                | - | 63579  | 95     | -   | 1(1)    | -      | 1(1)      | -      | 2%       | -   | KRY56610.1       |
|                                                                | B                | - |        | 78     | -   | 1(1)    | -      | 1(1)      | -      | 2%       | -   |                  |
|                                                                | C                | - |        | 211    | -   | 5(5)    | -      | 5(5)      | -      | 12%      | -   |                  |
|                                                                | -                | B | 54494  | -      | 92  | -       | 1(1)   | -         | 1(1)   | -        | 3%  | KRY56611.1       |
|                                                                | -                | C |        | -      | 106 | -       | 2(2)   | -         | 2(2)   | -        | 6%  |                  |
| Calreticulin, partial                                          | A                | - | 51118  | 208    | -   | 4(4)    | -      | 4(4)      | -      | 9%       | -   | KRY53845.1       |
|                                                                | B                | B |        | 734    | 153 | 15(15)  | 4(4)   | 11(11)    | 4(4)   | 40%      | 13% |                  |
| cAMP-dependent protein kinase catalytic subunit alpha, partial | A                | - | 52893  | 86     | -   | 2(2)    | -      | 2(2)      | -      | 5%       | -   | KRY51804.1       |
|                                                                | B                | - |        | 66     | -   | 1(1)    | -      | 1(1)      | -      | 1%       | -   |                  |
| cAMP-dependent protein kinase regulatory subunit               | A                | A | 47292  | 94     | 76  | 1(1)    | 1(1)   | 1(1)      | 1(1)   | 3%       | 3%  | KRY58719.1       |
|                                                                | B                | B |        | 119    | 106 | 1(1)    | 1(1)   | 1(1)      | 1(1)   | 3%       | 3%  |                  |
|                                                                | -                | C |        | -      | 118 | -       | 1(1)   | -         | 1(1)   | -        | 3%  |                  |
| CDK5RAP3-like protein                                          | -                | C | 57510  | -      | 80  | -       | 2(2)   | -         | 2(2)   | -        | 5%  | KRY58531.1       |
| Chitobiosyldiphosphodolichol beta-mannosyltransferase, partial | B                | - | 44025  | 99     | -   | 1(1)    | -      | 1(1)      | -      | 5%       | -   | KRY58507.1       |
| Chondroadherin                                                 | -                | C | 54970  | -      | 77  | -       | 1(1)   | -         | 1(1)   | -        | 2%  | KRY58748.1       |
| Chymotrypsin-like elastase family member 2A, partial           | A                | - | 46401  | 410    | -   | 12(12)  | -      | 10(10)    | -      | 33%      | -   | KRY59723.1       |
|                                                                | B                | B |        | 530    | 381 | 18(18)  | 12(12) | 16(16)    | 10(10) | 53%      | 33% |                  |
| Chymotrypsinogen B                                             | C                | - | 141902 | 126    | -   | 3(3)    | -      | 3(3)      | -      | 3%       | -   | KRY53598.1       |
| Cleavage and polyadenylation specificity factor subunit 2      | C                | C | 142890 | 363    | 380 | 12(12)  | 12(12) | 11(11)    | 11(11) | 9%       | 12% | KRY53654.1       |
| Cleavage stimulation factor subunit 3                          | B                | - | 125680 | 60     | -   | 1(1)    | -      | 1(1)      | -      | 0%       | -   | KRY56722.1       |
| Coatomer subunit delta                                         | C                | - | 63168  | 137    | -   | 4(4)    | -      | 4(4)      | -      | 7%       | -   | KRY53209.1       |
| Coronin-like protein cor-1                                     | C                | - | 164005 | 113    | -   | 2(2)    | -      | 2(2)      | -      | 1%       | -   | KRY60446.1       |

| Protein name                                                                                                     | Presence in band |   | Mass   | Scores |     | Matches |        | Sequences |      | Coverage |     | Accession number |
|------------------------------------------------------------------------------------------------------------------|------------------|---|--------|--------|-----|---------|--------|-----------|------|----------|-----|------------------|
| Cuticlin-1                                                                                                       | A                | - | 64300  | 69     | -   | 1(1)    | -      | 1(1)      | -    | 1%       | -   | KRY58751.1       |
| Cysteine desulfurase, mitochondrial                                                                              | B                | - | 49103  | 131    | -   | 2(2)    | -      | 2(2)      | -    | 6%       | -   | KRY49825.1       |
| Cytochrome b-c1 complex subunit 2, mitochondrial, partial                                                        | A                | - | 54732  | 174    | -   | 4(4)    | -      | 4(4)      | -    | 9%       | -   | KRY49815.1       |
|                                                                                                                  | B                | B |        | 203    | 109 | 3(3)    | 1(1)   | 3(3)      | 1(1) | 7%       | 3%  |                  |
| Cytosol aminopeptidase                                                                                           | A                | A | 57910  | 78     | 78  | 1(1)    | 1(1)   | 1(1)      | 1(1) | 1%       | 1%  | KRY54953.1       |
|                                                                                                                  | B                | - |        | 195    | -   | 5(5)    | -      | 5(5)      | -    | 10%      | -   |                  |
|                                                                                                                  | C                | C |        | 154    | 826 | 3(3)    | 19(19) | 3(3)      | 9(9) | 6%       | 20% |                  |
| Cytosolic non-specific dipeptidase                                                                               | B                | - | 58585  | 149    | -   | 3(3)    | -      | 3(3)      | -    | 8%       | -   | KRY53197.1       |
| Cytosolic purine 5'-nucleotidase                                                                                 | C                | - | 124481 | 92     | -   | 1(1)    | -      | 1(1)      | -    | 0%       | -   | KRY47033.1       |
| Delta-1-pyrroline-5-carboxylate dehydrogenase, mitochondrial, partial                                            | C                | C | 132746 | 100    | 379 | 1(1)    | 8(8)   | 1(1)      | 7(7) | 1%       | 7%  | KRY58107.1       |
| Deoxyribonuclease-2-alpha                                                                                        | -                | A | 116176 | -      | 261 | -       | 8(8)   | -         | 7(7) | -        | 9%  | KRY53318.1       |
|                                                                                                                  | C                | C |        | 331    | 321 | 7(7)    | 9(9)   | 7(7)      | 8(8) | 9%       | 10% |                  |
| Dihydrolipoyl dehydrogenase, mitochondrial                                                                       | A                | - | 58994  | 93     | -   | 1(1)    | -      | 1(1)      | -    | 2%       | -   | KRY53824.1       |
|                                                                                                                  | B                | B |        | 196    | 62  | 7(7)    | 1(1)   | 6(6)      | 1(1) | 13%      | 2%  |                  |
|                                                                                                                  | -                | C | 55073  | -      | 86  | -       | 2(2)   | -         | 2(2) | -        | 4%  | KRY53825.1       |
| Dihydrolipoyllysine-residue acetyltransferase component of pyruvate dehydrogenase complex, mitochondrial         | B                | B | 57120  | 198    | 114 | 6(5)    | 1(1)   | 6(5)      | 1(1) | 12%      | 2%  | KRY46167.1       |
|                                                                                                                  | C                | - |        | 106    | -   | 1(1)    | -      | 1(1)      | -    | 2%       | -   |                  |
| Dihydrolipoyllysine-residue succinyltransferase component of 2-oxoglutarate dehydrogenase complex, mitochondrial | B                | - | 59790  | 106    | -   | 3(3)    | -      | 3(3)      | -    | 5%       | -   | KRY53977.1       |
| Dihydropyrimidinase-related protein 3                                                                            | A                | - | 86548  | 62     | -   | 1(1)    | -      | 1(1)      | -    | 1%       | -   | KRY48683.1       |
|                                                                                                                  | B                | - |        | 131    | -   | 2(2)    | -      | 2(2)      | -    | 2%       | -   |                  |
|                                                                                                                  | C                | C |        | 99     | 129 | 2(2)    | 2(2)   | 2(2)      | 2(2) | 2%       | 2%  |                  |
| Diphthine--ammonia ligase, partial                                                                               | A                | - | 149815 | 67     | -   | 1(1)    | -      | 1(1)      | -    | 0%       | -   | KRY47980.1       |
|                                                                                                                  | B                | B |        | 110    | 67  | 3(3)    | 1(1)   | 3(3)      | 1(1) | 2%       | 0%  |                  |
| DnaJ -like protein dnj-20                                                                                        | A                | - | 45223  | 114    | -   | 2(2)    | -      | 2(2)      | -    | 7%       | -   | KRY45252.1       |
|                                                                                                                  | -                | B |        | -      | 106 | -       | 2(2)   | -         | 2(2) | -        | 7%  |                  |
| DnaJ -like protein subfamily C member 3, partial                                                                 | -                | C | 57419  | -      | 164 | -       | 4(4)   | -         | 4(4) | -        | 8%  | KRY53630.1       |
| Dynein heavy chain, cytoplasmic                                                                                  | A                | B | 569784 | 141    | 125 | 4(4)    | 3(3)   | 4(4)      | 3(3) | 0%       | 0%  | KRY59545.1       |
| Elongation factor 1-alpha                                                                                        | -                | A | 54609  | -      | 153 | -       | 4(4)   | -         | 3(3) | -        | 6%  | KRY54798.1       |
|                                                                                                                  | -                | B |        | -      | 268 | -       | 7(7)   | -         | 6(6) | -        | 20% |                  |
|                                                                                                                  | -                | C |        | -      | 245 | -       | 7(7)   | -         | 6(6) | -        | 15% |                  |
| Elongation factor 1-gamma, partial                                                                               | B                | - | 52493  | 179    | -   | 6(5)    | -      | 6(5)      | -    | 12%      | -   | KRY58663.1       |
| Elongation factor G, mitochondrial                                                                               | C                | C | 101076 | 64     | 79  | 1(1)    | 1(1)   | 1(1)      | 1(1) | 1%       | 1%  | KRY55228.1       |
| Elongation factor Ts, mitochondrial                                                                              | -                | B | 71640  | -      | 65  | -       | 1(1)   | -         | 1(1) | -        | 1%  | KRY51161.1       |
| Elongator complex protein 3                                                                                      | C                | - | 65381  | 75     | -   | 1(1)    | -      | 1(1)      | -    | 1%       | -   | KRY54549.1       |
| Endoplasmic reticulum resident protein 44                                                                        | A                | - | 50147  | 96     | -   | 1(1)    | -      | 1(1)      | -    | 2%       | -   | KRY50742.1       |
|                                                                                                                  | B                | B |        | 236    | 72  | 5(5)    | 1(1)   | 4(4)      | 1(1) | 13%      | 2%  |                  |
|                                                                                                                  | C                | - |        | 64     | -   | 1(1)    | -      | 1(1)      | -    | 2%       | -   |                  |
| Endoplasmin, partial                                                                                             | A                | A | 95730  | 262    | 91  | 7(7)    | 1(1)   | 6(6)      | 1(1) | 9%       | 1%  | KRY54651.1       |
|                                                                                                                  | -                | B |        | -      | 241 | -       | 6(6)   | -         | 5(5) | -        | 7%  |                  |
| Enoyl-CoA delta isomerase 2, mitochondrial                                                                       | A                | - | 47790  | 82     | -   | 1(1)    | -      | 1(1)      | -    | 3%       | -   | KRY48829.1       |

| Protein name                                             | Presence in band |   | Mass   | Scores |     | Matches |        | Sequences |        | Coverage |     | Accession number |
|----------------------------------------------------------|------------------|---|--------|--------|-----|---------|--------|-----------|--------|----------|-----|------------------|
| Enoyl-CoA hydratase, mitochondrial                       | A                | - | 34086  | 82     | -   | 1(1)    | -      | 1(1)      | -      | 4%       | -   | KRY60485.1       |
|                                                          | B                | - |        | 121    | -   | 2(2)    | -      | 2(2)      | -      | 7%       | -   |                  |
| Epoxide hydrolase 1                                      | B                | - | 95423  | 73     | -   | 1(1)    | -      | 1(1)      | -      | 1%       | -   | KRY56031.1       |
| Eukaryotic initiation factor 4A, partial                 | A                | A | 252102 | 173    | 82  | 4(4)    | 1(1)   | 3(3)      | 1(1)   | 1%       | 0%  | KRY53637.1       |
|                                                          | -                | B |        | -      | 138 | -       | 2(2)   | -         | 2(2)   | -        | 1%  |                  |
|                                                          | C                | C |        | 69     | 64  | 1(1)    | 1(1)   | 1(1)      | 1(1)   | 0%       | 0%  |                  |
| Eukaryotic initiation factor 4A-III                      | B                | - | 126738 | 165    | -   | 7(5)    | -      | 7(5)      | -      | 6%       | -   | KRY49327.1       |
| Eukaryotic initiation factor 4A-III                      | -                | C | 123600 | -      | 76  | -       | 1(1)   | -         | 1(1)   | -        | 1%  | KRY49326.1       |
| Eukaryotic peptide chain release factor subunit 1        | B                | - | 49470  | 87     | -   | 1(1)    | -      | 1(1)      | -      | 2%       | -   | KRY49983.1       |
| Eukaryotic translation initiation factor 3 subunit L     | C                | - | 65995  | 118    | -   | 6(6)    | -      | 6(6)      | -      | 10%      | -   | KRY53932.1       |
| Extended synaptotagmin-2, partial                        | C                | - | 205677 | 111    | -   | 4(4)    | -      | 4(4)      | -      | 2%       | -   | KRY50391.1       |
| Far upstream element-binding protein 2                   | B                | B | 75769  | 273    | 71  | 10(10)  | 1(1)   | 8(8)      | 1(1)   | 12%      | 1%  | KRY57083.1       |
|                                                          | C                | - |        | 93     | -   | 3(3)    | -      | 3(3)      | -      | 4%       | -   |                  |
| Filamin-A, partial                                       | -                | B | 259917 | -      | 84  | -       | 1(1)   | -         | 1(1)   | -        | 0%  | KRY59624.1       |
| Fragile X mental retardation protein 1 -like protein B   | C                | - | 64707  | 130    | -   | 4(4)    | -      | 4(4)      | -      | 6%       | -   | KRY58060.1       |
| Fructose-bisphosphate aldolase 1, partial                | A                | A | 44597  | 901    | 321 | 17(17)  | 8(8)   | 10(10)    | 6(6)   | 38%      | 18% | KRY52953.1       |
|                                                          | -                | B |        | -      | 669 | -       | 13(13) | -         | 9(9)   | -        | 34% |                  |
|                                                          | C                | C |        | 228    | 126 | 4(4)    | 1(1)   | 4(4)      | 1(1)   | 13%      | 2%  |                  |
| GDP-fucose protein O-fucosyltransferase 1                | A                | B | 55623  | 65     | 70  | 1(1)    | 1(1)   | 1(1)      | 1(1)   | 2%       | 2%  | KRY61128.1       |
| GDP-fucose protein O-fucosyltransferase 2                | -                | C | 67028  | -      | 66  | -       | 1(1)   | -         | 1(1)   | -        | 2%  | KRY57885.1       |
| Geranylgeranyl transferase type-2 subunit alpha          | C                | - | 65451  | 60     | -   | 1(1)    | -      | 1(1)      | -      | 1%       | -   | KRY54409.1       |
| Glioma pathogenesis-related protein 1                    | A                | - | 54399  | 103    | -   | 1(1)    | -      | 1(1)      | -      | 3%       | -   | KRY45995.1       |
| Glucose-6-phosphate 1-dehydrogenase                      | C                | - | 61532  | 116    | -   | 4(4)    | -      | 4(4)      | -      | 8%       | -   | KRY54351.1       |
| Glucose-6-phosphate isomerase                            | B                | - | 65882  | 187    | -   | 3(3)    | -      | 3(3)      | -      | 7%       | -   | KRY50483.1       |
|                                                          | C                | C |        | 462    | 193 | 13(11)  | 4(4)   | 13(11)    | 4(4)   | 26%      | 8%  |                  |
| Glucosylceramidase                                       | C                | - | 61978  | 214    | -   | 7(7)    | -      | 5(5)      | -      | 11%      | -   | KRY50060.1       |
| Glutamate dehydrogenase 2, mitochondrial                 | A                | A | 56781  | 95     | 78  | 2(2)    | 1(1)   | 2(2)      | 1(1)   | 4%       | 2%  | KRY47480.1       |
| Glutathione synthetase, partial                          | -                | C | 57435  | -      | 68  | -       | 1(1)   | -         | 1(1)   | -        | 1%  | KRY45971.1       |
| Glutathione-S-transferase                                | A                | - | 24198  | 71     | -   | 1(1)    | -      | 1(1)      | -      | 5%       | -   | ABA42916.1       |
|                                                          | C                | - |        | 72     | -   | 1(1)    | -      | 1(1)      | -      | 5%       | -   |                  |
| Glyceraldehyde-3-phosphate dehydrogenase                 | A                | A | 37666  | 142    | 497 | 5(5)    | 18(18) | 5(5)      | 12(12) | 16%      | 53% | KRY59635.1       |
|                                                          | B                | B |        | 199    | 123 | 3(2)    | 2(2)   | 3(2)      | 2(2)   | 11%      | 6%  |                  |
|                                                          | C                | C |        | 325    | 160 | 6(6)    | 3(3)   | 6(6)      | 3(3)   | 24%      | 13% |                  |
| Glycogen phosphorylase, partial                          | A                | - | 175168 | 85     | -   | 1(1)    | -      | 1(1)      | -      | 0%       | -   | KRY47089.1       |
|                                                          | B                | B |        | 117    | 84  | 1(1)    | 2(1)   | 1(1)      | 2(1)   | 0%       | 1%  |                  |
|                                                          | -                | C |        | -      | 130 | -       | 3(3)   | -         | 3(3)   | -        | 2%  |                  |
| Glycogenin-1                                             | A                | A | 41089  | 135    | 79  | 4(4)    | 2(1)   | 3(3)      | 2(1)   | 10%      | 5%  | KRY61196.1       |
|                                                          | B                | B |        | 118    | 106 | 2(2)    | 3(3)   | 2(2)      | 3(3)   | 7%       | 10% |                  |
| Guanine nucleotide-binding protein subunit beta-2-like 1 | B                | - | 39904  | 86     | -   | 1(1)    | -      | 1(1)      | -      | 3%       | -   | KRY55875.1       |
|                                                          | C                | - |        | 84     | -   | 1(1)    | -      | 1(1)      | -      | 3%       | -   |                  |
| Heat shock 70 kDa protein 13                             | C                | - | 50433  | 62     | -   | 1(1)    | -      | 1(1)      | -      | 3%       | -   | KRY49991.1       |
| Heat shock 70 kDa protein 4L                             | B                | - | 101361 | 136    | -   | 2(2)    | -      | 2(2)      | -      | 3%       | -   | KRY51771.1       |

| Protein name                                       | Presence in band |   | Mass   | Scores |     | Matches |        | Sequences |        | Coverage |     | Accession number |
|----------------------------------------------------|------------------|---|--------|--------|-----|---------|--------|-----------|--------|----------|-----|------------------|
|                                                    | C                | C |        | 412    | 98  | 11(11)  | 1(1)   | 11(11)    | 1(1)   | 17%      | 1%  |                  |
| Heat shock cognate 71 kDa protein, partial         | A                | A | 131529 | 548    | 206 | 18(17)  | 4(4)   | 15(14)    | 4(4)   | 15%      | 4%  | KRY58599.1       |
|                                                    | B                | B |        | 278    | 360 | 5(5)    | 13(13) | 5(5)      | 12(12) | 5%       | 13% |                  |
|                                                    | C                | C |        | 918    | 319 | 26(26)  | 10(9)  | 20(20)    | 10(9)  | 21%      | 10% |                  |
|                                                    |                  |   |        |        |     |         |        |           |        |          |     |                  |
| heat shock protein 70                              | -                | A | 71860  | -      | 206 | -       | 4(4)   | -         | 4(4)   | -        | 7%  | CAA73574.1       |
| Heat shock protein 83, partial                     | A                | A | 91707  | 109    | 91  | 5(5)    | 1(1)   | 5(5)      | 1(1)   | 5%       | 1%  | KRY48983.1       |
|                                                    | B                | B |        | 593    | 112 | 24(23)  | 3(3)   | 19(18)    | 3(3)   | 22%      | 4%  |                  |
|                                                    | C                | C |        | 264    | 194 | 10(9)   | 6(6)   | 9(8)      | 6(6)   | 12%      | 8%  |                  |
| Heterogeneous nuclear ribonucleoprotein F, partial | -                | C | 54653  | -      | 88  | -       | 1(1)   | -         | 1(1)   | -        | 2%  | KRY60656.1       |
| Hexokinase                                         | B                | - | 56783  | 567    | -   | 14(14)  | -      | 10(10)    | -      | 31%      | -   | KRY57386.1       |
| Hexokinase type 2, partial                         | B                | - | 52657  | 232    | -   | 3(3)    | -      | 3(3)      | -      | 8%       | -   | KRY53884.1       |
| Histidine--tRNA ligase, cytoplasmic                | -                | C | 60198  | -      | 93  | -       | 1(1)   | -         | 1(1)   | -        | 2%  | KRY60106.1       |
| Histone deacetylase Rpd3                           | -                | C | 55626  | -      | 105 | -       | 2(2)   | -         | 2(2)   | -        | 4%  | KRY47841.1       |
| Histone-lysine N-methyltransferase EHMT2, partial  | A                | B | 40953  | 75     | 104 | 1(1)    | 1(1)   | 1(1)      | 1(1)   | 3%       | 4%  | KRY52481.1       |
| Hsc70-interacting protein, partial                 | -                | C | 45031  | -      | 80  | -       | 1(1)   | -         | 1(1)   | -        | 3%  | KRY60345.1       |
| hypothetical protein T03_11006                     | -                | C | 163737 | -      | 256 | -       | 6(6)   | -         | 6(6)   | -        | 5%  | KRY56142.1       |
| hypothetical protein T03_13721                     | C                | - | 16489  | 61     | -   | 1(1)    | -      | 1(1)      | -      | 8%       | -   | KRY56557.1       |
| hypothetical protein T03_13827                     | C                | C | 13483  | 81     | 73  | 1(1)    | 1(1)   | 1(1)      | 1(1)   | 10%      | 9%  | KRY56487.1       |
| hypothetical protein T03_14678                     | -                | C | 55770  | -      | 454 | -       | 11(11) | -         | 6(6)   | -        | 17% | KRY57784.1       |
| hypothetical protein T03_17187                     | A                | A | 46783  | 743    | 175 | 14(14)  | 4(3)   | 10(10)    | 4(3)   | 36%      | 10% | KRY50178.1       |
|                                                    | B                | B |        | 1214   | 431 | 25(24)  | 9(9)   | 17(16)    | 8(8)   | 52%      | 27% |                  |
|                                                    | -                | C |        | -      | 59  | -       | 1(1)   | -         | 1(1)   | -        | 2%  |                  |
| hypothetical protein T03_17805, partial            | C                | - | 18630  | 62     | -   | 1(1)    | -      | 1(1)      | -      | 6%       | -   | KRY53056.1       |
| hypothetical protein T03_18095                     | B                | - | 49475  | 64     | -   | 1(1)    | -      | 1(1)      | -      | 2%       | -   | KRY58400.1       |
| hypothetical protein T03_4197                      | B                | - | 88736  | 73     | -   | 1(1)    | -      | 1(1)      | -      | 1%       | -   | KRY53644.1       |
|                                                    | C                | - |        | 238    | -   | 5(5)    | -      | 4(4)      | -      | 7%       | -   |                  |
| hypothetical protein T03_539                       | A                | A | 55965  | 603    | 229 | 15(15)  | 7(7)   | 9(9)      | 5(5)   | 22%      | 9%  | KRY55455.1       |
|                                                    | -                | B |        | -      | 468 | -       | 13(13) | -         | 9(9)   | -        | 19% |                  |
| hypothetical protein T03_5579, partial             | -                | A | 40699  | -      | 70  | -       | 1(1)   | -         | 1(1)   | -        | 2%  | KRY49176.1       |
| hypothetical protein T03_6875                      | C                | - | 13215  | 61     | -   | 1(1)    | -      | 1(1)      | -      | 10%      | -   | KRY51561.1       |
| hypothetical protein T03_7457                      | C                | - | 49230  | 201    | -   | 4(4)    | -      | 4(4)      | -      | 11%      | -   | KRY48668.1       |
| hypothetical protein T03_7459                      | B                | - | 13934  | 75     | -   | 1(1)    | -      | 1(1)      | -      | 7%       | -   | KRY60639.1       |
|                                                    | C                | C |        | 124    | 64  | 1(1)    | 1(1)   | 1(1)      | 1(1)   | 13%      | 13% |                  |
| hypothetical protein T03_7883                      | -                | B | 117012 | -      | 66  | -       | 1(1)   | -         | 1(1)   | -        | 1%  | KRY46989.1       |
|                                                    | -                | C |        | -      | 81  | -       | 2(2)   | -         | 2(2)   | -        | 2%  |                  |
| hypothetical protein T03_7939                      | -                | A | 64129  | -      | 300 | -       | 9(9)   | -         | 8(8)   | -        | 18% | KRY48964.1       |
| hypothetical protein T03_8666, partial             | A                | B | 29868  | 61     | 86  | 1(0)    | 3(2)   | 1(0)      | 3(2)   | 3%       | 13% | KRY58917.1       |
|                                                    | B                | C | 55679  | 412    | 227 | 8(8)    | 6(6)   | 6(6)      | 5(5)   | 19%      | 13% | KRY58914.1       |
| hypothetical protein T03_8694                      | A                | A | 40952  | 110    | 313 | 5(4)    | 11(11) | 5(4)      | 11(11) | 15%      | 32% | KRY46541.1       |
|                                                    | B                | B |        | 70     | 78  | 1(1)    | 2(1)   | 1(1)      | 2(1)   | 3%       | 5%  |                  |
|                                                    | C                | C |        | 65     | 64  | 2(2)    | 1(1)   | 2(2)      | 1(1)   | 5%       | 3%  |                  |
| hypothetical protein T03_9489                      | C                | C | 19940  | 72     | 82  | 2(2)    | 1(1)   | 2(2)      | 1(1)   | 11%      | 5%  | KRY46491.1       |

| Protein name                                                                | Presence in band |   | Mass   | Scores |     | Matches |        | Sequences |        | Coverage |     | Accession number |
|-----------------------------------------------------------------------------|------------------|---|--------|--------|-----|---------|--------|-----------|--------|----------|-----|------------------|
| Hypoxia up-regulated protein 1, partial                                     | C                | - | 108762 | 78     | -   | 1(1)    | -      | 1(1)      | -      | 1%       | -   | KRY49848.1       |
| Ig-like and fibronectin type-III domain-containing protein C25G4.10         | C                | C | 179761 | 70     | 77  | 1(1)    | 2(2)   | 1(1)      | 2(2)   | 0%       | 1%  | KRY58616.1       |
| Importin subunit alpha-4, partial                                           | -                | C | 151048 | -      | 61  | -       | 1(1)   | -         | 1(1)   | -        | 0%  | KRY51490.1       |
| Innexin unc-9                                                               | -                | A | 48936  | -      | 82  | -       | 1(1)   | -         | 1(1)   | -        | 2%  | KRY59455.1       |
| Innexin-12                                                                  | B                | - | 55187  | 120    | -   | 3(3)    | -      | 3(3)      | -      | 7%       | -   | KRY59456.1       |
| Intermediate filament protein B, partial                                    | A                | - | 71689  | 69     | -   | 1(1)    | -      | 1(1)      | -      | 1%       | -   | KRY59373.1       |
|                                                                             | B                | B |        | 397    | 75  | 16(14)  | 1(1)   | 15(13)    | 1(1)   | 24%      | 1%  |                  |
|                                                                             | C                | C |        | 390    | 289 | 17(17)  | 11(11) | 15(15)    | 10(10) | 24%      | 17% |                  |
|                                                                             |                  |   |        |        |     |         |        |           |        |          |     |                  |
| Intermediate filament protein ifa-1                                         | A                | A | 73429  | 207    | 120 | 9(8)    | 6(4)   | 8(7)      | 6(4)   | 12%      | 8%  | KRY45949.1       |
|                                                                             | B                | B |        | 791    | 120 | 34(33)  | 5(4)   | 29(28)    | 5(4)   | 37%      | 6%  |                  |
|                                                                             | C                | C |        | 675    | 518 | 25(24)  | 26(25) | 21(21)    | 23(22) | 32%      | 30% |                  |
|                                                                             |                  |   |        |        |     |         |        |           |        |          |     |                  |
| Intramembrane protease 2                                                    | -                | C | 52321  | -      | 71  | -       | 1(1)   | -         | 1(1)   | -        | 3%  | KRY54667.1       |
| Iron-sulfur cluster assembly enzyme ISCU, mitochondrial                     | C                | - | 202951 | 83     | -   | 1(1)    | -      | 1(1)      | -      | 0%       | -   | KRY49130.1       |
| Isopentenyl-diphosphate Delta-isomerase II, partial                         | C                | - | 41386  | 68     | -   | 1(1)    | -      | 1(1)      | -      | 2%       | -   | KRY59814.1       |
| J5 protein, partial                                                         | -                | A | 41174  | -      | 94  | -       | 1(1)   | -         | 1(1)   | -        | 2%  | AAD42227.1       |
| KDEL motif-containing protein 2, partial                                    |                  |   | 46318  | 105    | -   | 2(2)    | -      | 2(2)      | -      | 6%       | -   | KRY44318.1       |
| KH domain-containing, RNA-binding, signal transduction-associated protein 2 | C                | - | 49642  | 97     | -   | 1(1)    | -      | 1(1)      | -      | 2%       | -   | KRY48053.1       |
| Kynurenine--oxoglutarate transaminase 3                                     | A                | B | 60100  | 184    | 97  | 4(4)    | 1(1)   | 4(4)      | 1(1)   | 9%       | 2%  | KRY54139.1       |
| L-2-hydroxyglutarate dehydrogenase, mitochondrial                           | A                | B | 47961  | 120    | 116 | 2(2)    | 3(3)   | 2(2)      | 3(3)   | 5%       | 9%  | KRY56323.1       |
| LanC-like protein 2                                                         | -                | A | 87536  | -      | 97  | -       | 1(1)   | -         | 1(1)   | -        | 1%  | KRY60641.1       |
| LETM1 and EF-hand domain-containing protein 1, mitochondrial                | -                | B | 118848 | -      | 87  | -       | 1(1)   | -         | 1(1)   | -        | 1%  | KRY56766.1       |
| Leukocyte elastase inhibitor C, partial                                     | A                | - | 43705  | 104    | -   | 2(2)    | -      | 2(2)      | -      | 4%       | -   | KRY55578.1       |
|                                                                             | B                | B |        | 198    | 74  | 7(7)    | 1(1)   | 6(6)      | 1(1)   | 18%      | 2%  |                  |
| Lipase maturation factor 2                                                  | C                | - | 77441  | 128    | -   | 2(2)    | -      | 1(1)      | -      | 1%       | -   | KRY59894.1       |
| L-lactate dehydrogenase                                                     | C                | - | 44144  | 80     | -   | 1(1)    | -      | 1(1)      | -      | 3%       | -   | KRY58174.1       |
| L-threonine dehydratase catabolic TdcB                                      | -                | B | 45107  | -      | 73  | -       | 1(1)   | -         | 1(1)   | -        | 2%  | KRY56516.1       |
| Lupus La -like protein A, partial                                           | B                | - | 120320 | 143    | -   | 2(2)    | -      | 2(2)      | -      | 2%       | -   | KRY45724.1       |
|                                                                             | C                | - |        | 127    | -   | 2(2)    | -      | 2(2)      | -      | 2%       | -   |                  |
| Lysosomal aspartic protease, partial                                        | A                | - | 46676  | 212    | -   | 3(3)    | -      | 3(3)      | -      | 13%      | -   | KRY49432.1       |
|                                                                             | B                | B |        | 132    | 257 | 2(2)    | 3(3)   | 2(2)      | 3(3)   | 10%      | 14% |                  |
| MAGUK p55 subfamily member 2                                                | C                | - | 62788  | 61     | -   | 1(1)    | -      | 1(1)      | -      | 2%       | -   | KRY57541.1       |
| Malate dehydrogenase, cytoplasmic                                           | A                | - | 36616  | 99     | -   | 2(1)    | -      | 2(1)      | -      | 6%       | -   | KRY57329.1       |
|                                                                             | B                | - |        | 68     | -   | 2(2)    | -      | 2(2)      | -      | 4%       | -   |                  |
|                                                                             | C                | C |        | 224    | 126 | 5(5)    | 3(3)   | 5(5)      | 3(3)   | 17%      | 12% |                  |
| Malate dehydrogenase, partial                                               | -                | A | 43114  | -      | 156 | -       | 3(3)   | -         | 2(2)   | -        | 8%  | KRY47491.1       |
| Mannose-6-phosphate isomerase, partial                                      | A                | - | 47870  | 187    | -   | 7(7)    | -      | 6(6)      | -      | 19%      | -   | KRY55073.1       |
|                                                                             | -                | B |        | -      | 99  | -       | 3(2)   | -         | 3(2)   | -        | 10% |                  |
| Mediator of RNA polymerase II transcription subunit 23                      | B                | - | 258401 | 96     | -   | 3(2)    | -      | 3(2)      | -      | 2%       | -   | KRY54660.1       |
|                                                                             | -                | C |        | -      | 235 | -       | 8(8)   | -         | 7(7)   | -        | 3%  |                  |
| Medium-chain specific acyl-CoA dehydrogenase, mitochondrial, partial        | A                | - | 46251  | 188    | -   | 4(4)    | -      | 4(4)      | -      | 10%      | -   | KRY52707.1       |
|                                                                             | -                | B |        | -      | 148 | -       | 3(3)   | -         | 3(3)   | -        | 7%  |                  |

| Protein name                                                                          | Presence in band |   | Mass   | Scores |     | Matches |      | Sequences |      | Coverage |     | Accession number |
|---------------------------------------------------------------------------------------|------------------|---|--------|--------|-----|---------|------|-----------|------|----------|-----|------------------|
| Methionine aminopeptidase 1, partial                                                  | A                | - | 45052  | 139    | -   | 5(4)    | -    | 5(4)      | -    | 13%      | -   | KRY48197.1       |
| Methylmalonyl-CoA mutase, mitochondrial                                               | C                | - | 96758  | 70     | -   | 1(1)    | -    | 1(1)      | -    | 1%       | -   | KRY55816.1       |
| Mevalonate kinase, partial                                                            | A                | - | 49923  | 65     | -   | 1(1)    | -    | 1(1)      | -    | 2%       | -   | KRY48327.1       |
| Mitochondrial EF-Tu1 precursor                                                        | A                | - | 53698  | 63     | -   | 1(1)    | -    | 1(1)      | -    | 2%       | -   | BAF32575.1       |
|                                                                                       | B                | - |        | 198    | -   | 7(7)    | -    | 7(7)      | -    | 18%      | -   |                  |
| Mitochondrial inner membrane protein                                                  | C                | - | 51259  | 137    | -   | 2(2)    | -    | 2(2)      | -    | 4%       | -   | KRY52343.1       |
| Mitochondrial ornithine transporter 1                                                 | B                | - | 131282 | 81     | -   | 1(1)    | -    | 1(1)      | -    | 0%       | -   | KRY52596.1       |
| Mitochondrial succinyl-CoA ligase subunit beta -like protein                          | A                | A | 47920  | 272    | 82  | 8(8)    | 1(1) | 7(7)      | 1(1) | 20%      | 2%  | KRY60682.1       |
|                                                                                       | B                | B |        | 97     | 180 | 1(1)    | 5(5) | 1(1)      | 5(5) | 2%       | 12% |                  |
| Mitochondrial-processing peptidase subunit alpha                                      | A                | B | 114673 | 151    | 118 | 5(5)    | 2(2) | 5(5)      | 2(2) | 5%       | 2%  | KRY50357.1       |
|                                                                                       | -                | C | 62700  | -      | 117 | -       | 4(4) | -         | 3(3) | -        | 6%  | KRY50359.1       |
| Mitochondrial-processing peptidase subunit beta                                       | B                | B | 95488  | 469    | 68  | 13(13)  | 1(1) | 12(12)    | 1(1) | 18%      | 1%  | KRY53080.1       |
| Motochondrial isocitrate dehydrogenase, partial                                       | A                | - | 91260  | 72     | -   | 1(1)    | -    | 1(1)      | -    | 1%       | -   | KRY60163.1       |
|                                                                                       | -                | B |        | -      | 82  | -       | 1(1) | -         | 1(1) | -        | 1%  |                  |
| mRNA-capping enzyme                                                                   | C                | - | 63559  | 79     | -   | 1(1)    | -    | 1(1)      | -    | 1%       | -   | KRY57625.1       |
| Myophilin                                                                             | A                | - | 29149  | 95     | -   | 1(1)    | -    | 1(1)      | -    | 4%       | -   | KRY53866.1       |
|                                                                                       | B                | - |        | 106    | -   | 1(1)    | -    | 1(1)      | -    | 4%       | -   |                  |
|                                                                                       | C                | C |        | 127    | 101 | 2(2)    | 1(1) | 2(2)      | 1(1) | 9%       | 4%  |                  |
| Myosin regulatory light chain 1, partial                                              | C                | - | 21489  | 82     | -   | 1(1)    | -    | 1(1)      | -    | 7%       | -   | KRY55173.1       |
| Myosin-4, partial                                                                     | A                | - | 233904 | 124    | -   | 4(4)    | -    | 4(4)      | -    | 2%       | -   | KRY50587.1       |
|                                                                                       | B                | - |        | 90     | -   | 3(2)    | -    | 3(2)      | -    | 1%       | -   |                  |
|                                                                                       | C                | - |        | 438    | -   | 13(13)  | -    | 11(11)    | -    | 6%       | -   |                  |
| NAD kinase 2, mitochondrial, partial                                                  | B                | - | 53835  | 101    | -   | 1(1)    | -    | 1(1)      | -    | 2%       | -   | KRY54079.1       |
| NADH dehydrogenase [ubiquinone] 1 alpha subcomplex subunit 10, mitochondrial, partial | B                | - | 52610  | 93     | -   | 1(1)    | -    | 1(1)      | -    | 2%       | -   | KRY51158.1       |
| NADH dehydrogenase [ubiquinone] 1 alpha subcomplex subunit 9, mitochondrial, partial  | A                | - | 51279  | 70     | -   | 1(1)    | -    | 1(1)      | -    | 2%       | -   | KRY46213.1       |
| NADP-dependent malic enzyme, mitochondrial, partial                                   | B                | - | 136914 | 84     | -   | 1(1)    | -    | 1(1)      | -    | 1%       | -   | KRY59664.1       |
|                                                                                       | C                | C |        | 1136   | 178 | 31(31)  | 6(6) | 22(22)    | 6(6) | 21%      | 4%  |                  |
| NADP-dependent malic enzyme, partial                                                  | C                | - | 67015  | 116    | -   | 3(3)    | -    | 3(3)      | -    | 5%       | -   | KRY50082.1       |
| Nedd8-activating enzyme E1 regulatory subunit                                         | B                | - | 81417  | 92     | -   | 1(1)    | -    | 1(1)      | -    | 1%       | -   | KRY49521.1       |
| Neuroglian                                                                            | C                | - | 151761 | 245    | -   | 5(5)    | -    | 5(5)      | -    | 5%       | -   | KRY57340.1       |
| Nicotinamide phosphoribosyltransferase, partial                                       | A                | - | 54479  | 68     | -   | 1(1)    | -    | 1(1)      | -    | 2%       | -   | KRY61111.1       |
|                                                                                       | B                | - |        | 86     | -   | 1(1)    | -    | 1(1)      | -    | 2%       | -   |                  |
| NSFL1 cofactor p47                                                                    | A                | - | 96155  | 76     | -   | 1(1)    | -    | 1(1)      | -    | 1%       | -   | KRY55488.1       |
|                                                                                       | -                | B |        | -      | 79  | -       | 1(1) | -         | 1(1) | -        | 1%  |                  |
| Nuclear migration protein nudC, partial                                               | -                | A | 36924  | -      | 74  | -       | 1(1) | -         | 1(1) | -        | 2%  | KRY49193.1       |
| Nuclease domain-containing protein                                                    | C                | - | 105353 | 94     | -   | 1(1)    | -    | 1(1)      | -    | 1%       | -   | KRY53536.1       |
| Nucleobindin-2                                                                        | C                | - | 69745  | 75     | -   | 1(1)    | -    | 1(1)      | -    | 2%       | -   | KRY57471.1       |
| Nucleolar GTP-binding protein 1                                                       | C                | C | 217720 | 122    | 82  | 3(3)    | 1(1) | 2(2)      | 1(1) | 1%       | 0%  | KRY59079.1       |
| Nucleolysin TIAR                                                                      | -                | A | 41098  | -      | 78  | -       | 1(1) | -         | 1(1) | -        | 3%  | KRY56682.1       |
| Nucleosome assembly protein 1-like 4                                                  | B                | - | 42769  | 190    | -   | 6(5)    | -    | 6(5)      | -    | 19%      | -   | KRY56244.1       |



| Protein name                                               | Presence in band |   | Mass   | Scores |     | Matches |      | Sequences |      | Coverage |     | Accession number |
|------------------------------------------------------------|------------------|---|--------|--------|-----|---------|------|-----------|------|----------|-----|------------------|
| NudC domain-containing protein 1                           | C                | - | 70408  | 147    | -   | 6(5)    | -    | 6(5)      | -    | 9%       | -   | KRY59809.1       |
| Obg-like ATPase 1                                          | A                |   | 46859  | 130    | -   | 3(3)    | -    | 3(3)      | -    | 7%       | -   | KRY54762.1       |
|                                                            | -                | B |        | -      | 200 | -       | 5(5) | -         | 5(5) | -        | 16% |                  |
| Oligosaccharyltransferase complex subunit OSTC             | A                | - | 35534  | 71     | -   | 1(1)    | -    | 1(1)      | -    | 4%       | -   | KRY48322.1       |
|                                                            | B                | - |        | 73     | -   | 1(1)    | -    | 1(1)      | -    | 4%       | -   |                  |
|                                                            | C                | - |        | 86     | -   | 1(1)    | -    | 1(1)      | -    | 4%       | -   |                  |
| Ornithine decarboxylase, partial                           | -                | B | 168568 | -      | 104 | -       | 1(1) | -         | 1(1) | -        | 1%  | KRY52483.1       |
| Paramyosin, partial                                        | -                | A | 96956  | -      | 74  | -       | 1(1) | -         | 1(1) | -        | 1%  | KRY49321.1       |
|                                                            | C                | - |        | 114    | -   | 3(3)    | -    | 3(3)      | -    | 3%       | -   |                  |
| Peroxiredoxin-2, partial                                   | A                | - | 23367  | 186    | -   | 3(3)    | -    | 3(3)      | -    | 18%      | -   | KRY49990.1       |
|                                                            | -                | B |        | -      | 165 | -       | 3(3) | -         | 3(3) | -        | 18% |                  |
| Phosphate carrier protein, mitochondrial, partial          | -                | A | 69926  | -      | 92  | -       | 1(1) | -         | 1(1) | -        | 2%  | KRY57035.1       |
|                                                            | B                | - |        | 94     | -   | 2(2)    | -    | 2(2)      | -    | 3%       | -   |                  |
|                                                            | -                | C |        | -      | 88  | -       | 1(1) | -         | 1(1) | -        | 2%  |                  |
| Phosphoacetylglucosamine mutase                            | A                | - | 76610  | 72     | -   | 1(1)    | -    | 1(1)      | -    | 1%       | -   | KRY55926.1       |
|                                                            | B                | - |        | 84     | -   | 1(1)    | -    | 1(1)      | -    | 1%       | -   |                  |
|                                                            | -                | C |        | -      | 94  | -       | 1(1) | -         | 1(1) | -        | 1%  |                  |
| Phosphoglucomutase-1                                       | B                | - | 62761  | 89     | -   | 2(2)    | -    | 2(2)      | -    | 3%       | -   | KRY58984.1       |
|                                                            | C                | C |        | 335    | 92  | 10(9)   | 3(3) | 8(7)      | 3(3) | 17%      | 6%  |                  |
| Phosphoinositide 3-kinase regulatory subunit 4, partial    | -                | A | 249279 | -      | 82  | -       | 1(1) | -         | 1(1) | -        | 0%  | KRY53638.1       |
|                                                            | -                | B |        | -      | 138 | -       | 2(2) | -         | 2(2) | -        | 1%  |                  |
|                                                            | C                | C |        | 69     | 64  | 1(1)    | 1(1) | 1(1)      | 1(1) | 0%       | 0%  |                  |
| Poly(U)-specific endoribonuclease -like protein, partial   | -                | B | 61077  | -      | 65  | -       | 1(1) | -         | 1(1) | -        | 1%  | KRY51160.1       |
| Polyadenylate-binding protein                              | -                | B | 63357  | -      | 97  | -       | 1(1) | -         | 1(1) | -        | 3%  | KRY49582.1       |
|                                                            | -                | C |        | -      | 130 | -       | 3(3) | -         | 3(3) | -        | 6%  |                  |
| Polyadenylate-binding protein 1                            | A                | - | 89404  | 151    | -   | 4(4)    | -    | 4(4)      | -    | 5%       | -   | KRY49579.1       |
|                                                            | B                | - |        | 228    | -   | 5(5)    | -    | 5(5)      | -    | 8%       | -   |                  |
|                                                            | C                | C |        | 165    | 130 | 3(3)    | 3(3) | 3(3)      | 3(3) | 5%       | 4%  |                  |
| Polyribonucleotide nucleotidyltransferase 1, mitochondrial | C                | C | 137745 | 113    | 77  | 3(3)    | 1(1) | 3(3)      | 1(1) | 2%       | 1%  | KRY55114.1       |
| Polyubiquitin                                              | -                | A | 71793  | -      | 62  | -       | 1(0) | -         | 1(0) | -        | 1%  | KRY46475.1       |
|                                                            | B                | B |        | 76     | 108 | 2(1)    | 1(1) | 2(1)      | 1(1) | 2%       | 2%  |                  |
|                                                            | C                | C |        | 80     | 97  | 1(1)    | 1(1) | 1(1)      | 1(1) | 2%       | 2%  |                  |
| Polyubiquitin -like protein, partial                       | A                | A | 14366  | 122    | 62  | 2(1)    | 1(0) | 2(1)      | 1(0) | 19%      | 7%  | KRY24237.1       |
|                                                            | B                | - |        | 76     | -   | 2(1)    | -    | 2(1)      | -    | 14%      | -   |                  |
|                                                            | -                | A | 12545  | -      | 62  | -       | 1(0) | -         | 1(0) | -        | 8%  | KRY37210.1       |
|                                                            | -                | B |        | -      | 108 | -       | 1(1) | -         | 1(1) | -        | 14% |                  |
|                                                            | C                | C |        | 80     | 97  | 1(1)    | 1(1) | 1(1)      | 1(1) | 14%      | 14% |                  |
| Polyubiquitin-B, partial                                   | -                | A | 17394  | -      | 62  | -       | 1(0) | -         | 1(0) | -        | 5%  | KRY44570.1       |
|                                                            | B                | B |        | 76     | 108 | 2(1)    | 1(1) | 2(1)      | 1(1) | 11%      | 10% |                  |
|                                                            | C                | C |        | 80     | 97  | 1(1)    | 1(1) | 1(1)      | 1(1) | 10%      | 10% |                  |
| Polyubiquitin-C                                            | -                | A | 39424  | -      | 62  | -       | 1(0) | -         | 1(0) | -        | 2%  | KRY55776.1       |
|                                                            | B                | B |        | 76     | 108 | 2(1)    | 1(1) | 2(1)      | 1(1) | 5%       | 4%  |                  |

| Protein name                                                                           | Presence in band |   | Mass   | Scores |     | Matches |        | Sequences |        | Coverage |     | Accession number |
|----------------------------------------------------------------------------------------|------------------|---|--------|--------|-----|---------|--------|-----------|--------|----------|-----|------------------|
|                                                                                        | C                | C |        | 80     | 97  | 1(1)    | 1(1)   | 1(1)      | 1(1)   | 4%       | 4%  |                  |
| Proactivator polypeptide, partial                                                      | B                | C | 56771  | 58     | 87  | 1(1)    | 2(2)   | 1(1)      | 2(2)   | 3%       | 5%  | KRY46764.1       |
| Proliferation-associated protein 2G4, partial                                          | A                | - | 49607  | 128    | -   | 6(4)    | -      | 6(4)      | -      | 14%      | -   | KRY53054.1       |
|                                                                                        | B                | B |        | 281    | 164 | 9(9)    | 4(4)   | 9(9)      | 4(4)   | 24%      | 10% |                  |
| Prolyl 4-hydroxylase subunit alpha-2                                                   | C                | - | 130247 | 93     | -   | 3(3)    | -      | 2(2)      | -      | 1%       | -   | KRY58929.1       |
| Propionyl-CoA carboxylase alpha chain, mitochondrial                                   | B                | - | 441396 | 219    | -   | 4(4)    | -      | 4(4)      | -      | 1%       | -   | KRY51819.1       |
|                                                                                        | -                | C |        | -      | 66  | -       | 1(1)   | -         | 1(1)   | -        | 0%  |                  |
| Propionyl-CoA carboxylase beta chain, mitochondrial, partial                           | A                | - | 59995  | 74     | -   | 1(1)    | -      | 1(1)      | -      | 1%       | -   | KRY52668.1       |
|                                                                                        | C                | C |        | 100    | 549 | 2(2)    | 16(16) | 2(2)      | 13(13) | 4%       | 30% |                  |
| Protein AAR2 -like protein                                                             | A                | - | 68097  | 75     | -   | 1(1)    | -      | 1(1)      | -      | 1%       | -   | KRY56554.1       |
|                                                                                        | -                | B |        | -      | 69  | -       | 1(1)   | -         | 1(1)   | -        | 1%  |                  |
| Protein arginine N-methyltransferase 1, partial                                        | A                | A | 41784  | 245    | 62  | 8(8)    | 2(2)   | 7(7)      | 2(2)   | 22%      | 5%  | KRY51927.1       |
|                                                                                        | -                | B |        | -      | 130 | -       | 6(6)   | -         | 6(6)   | -        | 17% |                  |
| Protein arginine N-methyltransferase 6, partial                                        | -                | A | 77995  | -      | 117 | -       | 3(3)   | -         | 2(2)   | -        | 3%  | KRY58901.1       |
| Protein argonaute-2                                                                    | C                | - | 239895 | 69     | -   | 1(1)    | -      | 1(1)      | -      | 0%       | -   | KRY49018.1       |
| Protein CLEC16A, partial                                                               | C                | - | 246145 | 111    | -   | 4(4)    | -      | 4(4)      | -      | 2%       | -   | KRY50389.1       |
| Protein DDI1 -like protein 2                                                           | B                | - | 44709  | 118    | -   | 1(1)    | -      | 1(1)      | -      | 5%       | -   | KRY49840.1       |
| Protein disulfide-isomerase, partial                                                   | C                | - | 136243 | 146    | -   | 3(3)    | -      | 3(3)      | -      | 2%       | -   | KRY60939.1       |
| Protein ERGIC-53, partial                                                              | B                | - | 57042  | 77     | -   | 2(2)    | -      | 2(2)      | -      | 3%       | -   | KRY52865.1       |
|                                                                                        | -                | C |        | -      | 69  | -       | 1(1)   | -         | 1(1)   | -        | 1%  |                  |
| Protein FAM98A                                                                         | A                | - | 69473  | 91     | -   | 2(2)    | -      | 2(2)      | -      | 3%       | -   | KRY55912.1       |
| Protein HIRA                                                                           | C                | - | 155136 | 229    | -   | 6(6)    | -      | 6(6)      | -      | 4%       | -   | KRY45698.1       |
| Protein LSM14 -like protein A                                                          | C                | - | 51261  | 137    | -   | 2(2)    | -      | 2(2)      | -      | 7%       | -   | KRY47653.1       |
| Protein MON2 -like protein                                                             | B                | - | 227085 | 86     | -   | 1(1)    | -      | 1(1)      | -      | 1%       | -   | KRY53689.1       |
| Protein pad-1, partial                                                                 | -                | B | 269147 | -      | 71  | -       | 1(1)   | -         | 1(1)   | -        | 0%  | KRY55730.1       |
| Protein Skeletor, isoforms B/C                                                         | C                | - | 158475 | 92     | -   | 2(2)    | -      | 2(2)      | -      | 1%       | -   | KRY58447.1       |
| Protein transport protein Sec61 subunit alpha isoform 2                                | -                | A | 46439  | -      | 73  | -       | 2(1)   | -         | 2(1)   | -        | 4%  | KRY54101.1       |
| Protein transport protein Sec61 subunit alpha-like 2                                   | -                | A | 50898  | -      | 73  | -       | 2(1)   | -         | 2(1)   | -        | 4%  | KRY54103.1       |
| putative [pyruvate dehydrogenase (acetyl-transferring)] kinase, mitochondrial, partial | A                | - | 53118  | 139    | -   | 4(4)    | -      | 3(3)      | -      | 8%       | -   | KRY57184.1       |
|                                                                                        | -                | B |        | -      | 92  | -       | 2(2)   | -         | 2(2)   | -        | 7%  |                  |
| putative 26S protease regulatory subunit 10B                                           | A                | - | 77871  | 114    | -   | 3(3)    | -      | 3(3)      | -      | 5%       | -   | KRY59565.1       |
|                                                                                        | B                | - |        | 462    | -   | 14(14)  | -      | 13(13)    | -      | 22%      | -   |                  |
| putative 26S proteasome regulatory subunit rpn-6.1                                     | B                | - | 51807  | 103    | -   | 2(2)    | -      | 2(2)      | -      | 4%       | -   | KRY56382.1       |
|                                                                                        | -                | C |        | -      | 68  | -       | 1(1)   | -         | 1(1)   | -        | 2%  |                  |
| putative aconitate hydratase, mitochondrial                                            | A                | - | 232635 | 134    | -   | 2(2)    | -      | 2(2)      | -      | 1%       | -   | KRY56796.1       |
|                                                                                        | B                | B |        | 97     | 91  | 3(3)    | 1(1)   | 3(3)      | 1(1)   | 2%       | 0%  |                  |
|                                                                                        | -                | C |        | -      | 143 | -       | 4(3)   | -         | 4(3)   | -        | 2%  |                  |
| putative aminopeptidase W07G4.4                                                        | C                | - | 66737  | 574    | -   | 19(18)  | -      | 15(14)    | -      | 28%      | -   | KRY54333.1       |
|                                                                                        | -                | C | 62585  | -      | 100 | -       | 3(3)   | -         | 3(3)   | -        | 5%  | KRY54332.1       |
| putative arginine kinase F46H5.3                                                       | A                | A | 45915  | 340    | 88  | 11(10)  | 1(1)   | 9(8)      | 1(1)   | 29%      | 3%  | KRY58392.1       |
|                                                                                        | B                | - |        | 106    | -   | 2(2)    | -      | 2(2)      | -      | 6%       | -   |                  |
|                                                                                        | C                | C |        | 70     | 72  | 1(1)    | 1(1)   | 1(1)      | 1(1)   | 2%       | 3%  |                  |

| Protein name                                                                  | Presence in band |   | Mass   | Scores |     | Matches |        | Sequences |      | Coverage |     | Accession number |
|-------------------------------------------------------------------------------|------------------|---|--------|--------|-----|---------|--------|-----------|------|----------|-----|------------------|
| putative glutamine--tRNA ligase, partial                                      | C                | - | 207108 | 122    | -   | 3(3)    | -      | 3(3)      | -    | 1%       | -   | KRY57355.1       |
| putative glycerol-3-phosphate dehydrogenase 2                                 | -                | A | 38473  | -      | 126 | -       | 1(1)   | -         | 1(1) | -        | 4%  | KRY56481.1       |
| putative histone-binding protein Caf1                                         | B                | - | 50720  | 173    | -   | 7(7)    | -      | 7(7)      | -    | 15%      | -   | KRY53239.1       |
| putative integrin beta-like protein                                           | A                | - | 59305  | 83     | -   | 2(2)    | -      | 2(2)      | -    | 6%       | -   | KRY46033.1       |
|                                                                               | B                | - |        | 56     | -   | 1(1)    | -      | 1(1)      | -    | 3%       | -   |                  |
| putative isocitrate dehydrogenase [NAD] subunit alpha, mitochondrial, partial | -                | A | 43672  | -      | 63  | -       | 1(0)   | -         | 1(0) | -        | 2%  | KRY48474.1       |
| putative methylmalonate-semialdehyde dehydrogenase [acylating], mitochondrial | -                | C | 47384  | -      | 62  | -       | 1(1)   | -         | 1(1) | -        | 2%  | KRY58639.1       |
| putative oxidoreductase -like protein                                         | A                | B | 46423  | 74     | 84  | 1(1)    | 1(1)   | 1(1)      | 1(1) | 2%       | 2%  | KRY46329.1       |
| putative phenylalanine-4-hydroxylase 1                                        | -                | C | 54813  | -      | 78  | -       | 1(1)   | -         | 1(1) | -        | 2%  | KRY52089.1       |
| putative phosphoglycerate kinase                                              | A                | - | 62385  | 605    | -   | 20(20)  | -      | 17(17)    | -    | 39%      | -   | KRY46312.1       |
|                                                                               | -                | B |        | -      | 334 | -       | 11(11) | -         | 9(9) | -        | 21% |                  |
|                                                                               | -                | A | 62151  | -      | 113 | -       | 1(1)   | -         | 1(1) | -        | 2%  | KRY46311.1       |
|                                                                               | C                | - |        | 109    | -   | 2(2)    | -      | 2(2)      | -    | 4%       | -   |                  |
| putative phospholipase B-like 2, partial                                      | -                | B | 65395  | -      | 82  | -       | 1(1)   | -         | 1(1) | -        | 1%  | KRY61331.1       |
| putative pyruvate dehydrogenase E1 component subunit alpha, mitochondrial     | A                | - | 49940  | 238    | -   | 5(5)    | -      | 5(5)      | -    | 13%      | -   | KRY58181.1       |
|                                                                               | -                | A | 48977  | -      | 245 | -       | 8(8)   | -         | 7(7) | -        | 17% | KRY58179.1       |
| putative sodium/potassium-transporting ATPase subunit beta-3                  | A                | - | 35639  | 68     | -   | 1(1)    | -      | 1(1)      | -    | 3%       | -   | KRY55118.1       |
|                                                                               | B                | - |        | 134    | -   | 2(2)    | -      | 2(2)      | -    | 9%       | -   |                  |
|                                                                               | C                | - |        | 91     | -   | 1(1)    | -      | 1(1)      | -    | 3%       | -   |                  |
| putative splicing factor, arginine/serine-rich 7, partial                     | C                | - | 137028 | 72     | -   | 1(1)    | -      | 1(1)      | -    | 1%       | -   | KRY51241.1       |
| putative trans-2-enoyl-CoA reductase 1, mitochondrial                         | -                | A | 39830  | -      | 111 | -       | 1(1)   | -         | 1(1) | -        | 3%  | KRY50342.1       |
| putative UDP-glucuronosyltransferase ugt-58                                   | C                | - | 72680  | 67     | -   | 1(1)    | -      | 1(1)      | -    | 2%       | -   | KRY54467.1       |
| Pyridine nucleotide-disulfide oxidoreductase domain-containing protein 1      | -                | C | 55815  | -      | 224 | -       | 6(6)   | -         | 6(6) | -        | 14% | KRY46015.1       |
| Pyruvate kinase PKLR                                                          | C                | - | 69929  | 149    | -   | 3(3)    | -      | 3(3)      | -    | 6%       | -   | KRY57523.1       |
| Pyruvate kinase PKM                                                           | C                | - | 65506  | 149    | -   | 3(3)    | -      | 3(3)      | -    | 6%       | -   | KRY57524.1       |
| Rab GDP dissociation inhibitor alpha                                          | A                | A | 50324  | 301    | 68  | 8(8)    | 1(1)   | 7(7)      | 1(1) | 21%      | 2%  | KRY54650.1       |
|                                                                               | B                | B |        | 1049   | 125 | 27(26)  | 3(3)   | 19(18)    | 3(3) | 54%      | 7%  |                  |
| Rab proteins geranylgeranyltransferase component A                            | C                | - | 63173  | 88     | -   | 2(2)    | -      | 2(2)      | -    | 4%       | -   | KRY47219.1       |
| Ran GTPase-activating protein 1, partial                                      | C                | - | 66199  | 190    | -   | 5(5)    | -      | 4(4)      | -    | 7%       | -   | KRY60944.1       |
| Replicase polypeptide 1a                                                      | -                | A | 82573  | -      | 94  | -       | 1(1)   | -         | 1(1) | -        | 1%  | KRY55933.1       |
| Replication protein A 70 kDa DNA-binding subunit                              | -                | C | 72373  | -      | 64  | -       | 1(1)   | -         | 1(1) | -        | 2%  | KRY46120.1       |
| Retrovirus-related Pol polypeptide from transposon                            | -                | A | 68132  | -      | 78  | -       | 1(1)   | -         | 1(1) | -        | 1%  | KRY48786.1       |
| Rho GTPase-activating protein 39                                              | B                | - | 229114 | 78     | -   | 2(2)    | -      | 2(2)      | -    | 1%       | -   | KRY55506.1       |
| Ribokinase, partial                                                           | -                | A | 34856  | -      | 183 | -       | 7(6)   | -         | 7(6) | -        | 23% | KRY56022.1       |
| RNA-binding motif, single-stranded-interacting protein 3                      | C                | - | 63655  | 98     | -   | 3(3)    | -      | 3(3)      | -    | 5%       | -   | KRY50396.1       |
| RNA-binding protein squid                                                     | -                | A | 38365  | -      | 63  | -       | 1(0)   | -         | 1(0) | -        | 2%  | KRY50692.1       |
|                                                                               | B                | - |        | 79     | -   | 1(1)    | -      | 1(1)      | -    | 4%       | -   |                  |
| RuvB-like 2                                                                   | B                | - | 52985  | 68     | -   | 1(1)    | -      | 1(1)      | -    | 4%       | -   | KRY54932.1       |
| RuvB-like helicase 1                                                          | B                | - | 111487 | 88     | -   | 1(1)    | -      | 1(1)      | -    | 1%       | -   | KRY48652.1       |
| Secernin-3, partial                                                           | -                | A | 110075 | -      | 85  | -       | 1(1)   | -         | 1(1) | -        | 1%  | KRY45763.1       |

| Protein name                                                             | Presence in band |   | Mass   | Scores |     | Matches |        | Sequences |      | Coverage |     | Accession number |
|--------------------------------------------------------------------------|------------------|---|--------|--------|-----|---------|--------|-----------|------|----------|-----|------------------|
| secretion antigen precursor                                              | A                | - | 46673  | 67     | -   | 1(1)    | -      | 1(1)      | -    | 2%       | -   | CAD86782.1       |
|                                                                          | C                | C |        | 782    | 454 | 20(20)  | 11(11) | 11(11)    | 6(6) | 31%      | 20% |                  |
| Serine hydroxymethyltransferase                                          | B                | B | 33657  | 126    | 107 | 1(1)    | 1(1)   | 1(1)      | 1(1) | 4%       | 4%  | KRY56265.1       |
|                                                                          | -                | C |        | -      | 126 | -       | 1(1)   | -         | 1(1) | -        | 4%  |                  |
| Serine protease 30                                                       | A                | A | 146279 | 229    | 76  | 4(4)    | 1(1)   | 4(4)      | 1(1) | 4%       | 1%  | KRY58841.1       |
|                                                                          | B                | B |        | 1025   | 254 | 18(18)  | 3(3)   | 9(9)      | 3(3) | 8%       | 5%  |                  |
|                                                                          | C                | C |        | 604    | 306 | 9(9)    | 7(7)   | 6(6)      | 6(6) | 6%       | 7%  |                  |
| Serine/threonine-protein phosphatase 2B catalytic subunit 2              | C                | - | 55902  | 134    | -   | 3(3)    | -      | 3(3)      | -    | 7%       | -   | KRY57383.1       |
| Serine/threonine-protein phosphatase 5                                   | C                | - | 59857  | 78     | -   | 1(1)    | -      | 1(1)      | -    | 2%       | -   | KRY53930.1       |
| Serine--tRNA ligase, cytoplasmic                                         | -                | C | 204653 | -      | 235 | -       | 8(8)   | -         | 7(7) | -        | 4%  | KRY54661.1       |
| Signal recognition particle subunit SRP72                                | C                | - | 78986  | 62     | -   | 1(1)    | -      | 1(1)      | -    | 1%       | -   | KRY48636.1       |
| Signal transducing adapter molecule 1                                    | B                | - | 46966  | 70     | -   | 1(1)    | -      | 1(1)      | -    | 4%       | -   | KRY51332.1       |
| Snake venom 5'-nucleotidase                                              | -                | A | 183199 | -      | 65  | -       | 1(1)   | -         | 1(1) | -        | 0%  | KRY49427.1       |
|                                                                          | B                | - |        | 270    | -   | 4(4)    | -      | 3(3)      | -    | 3%       | -   |                  |
|                                                                          | C                | C |        | 733    | 154 | 20(20)  | 3(3)   | 14(14)    | 3(3) | 10%      | 2%  |                  |
| Solute carrier family 2, facilitated glucose transporter member 3        | B                | - | 167928 | 168    | -   | 2(2)    | -      | 2(2)      | -    | 1%       | -   | KRY47169.1       |
|                                                                          | -                | C |        | -      | 114 | -       | 1(1)   | -         | 1(1) | -        | 0%  |                  |
| Spectrin beta chain                                                      | -                | C | 270460 | -      | 63  | -       | 1(1)   | -         | 1(1) | -        | 0%  | KRY58047.1       |
| Spliceosome RNA helicase DDX39B                                          | A                | - | 83161  | 80     | -   | 1(1)    | -      | 1(1)      | -    | 1%       | -   | KRY50703.1       |
|                                                                          | B                | - |        | 220    | -   | 7(7)    | -      | 7(7)      | -    | 11%      | -   |                  |
|                                                                          | -                | C |        | -      | 195 | -       | 5(5)   | -         | 5(5) | -        | 7%  |                  |
| Splicing factor 3A subunit 1, partial                                    | B                | - | 116221 | 75     | -   | 1(1)    | -      | 1(1)      | -    | 1%       | -   | KRY50075.1       |
| Splicing factor 3A subunit 3                                             | C                | - | 58548  | 68     | -   | 2(1)    | -      | 2(1)      | -    | 4%       | -   | KRY56136.1       |
| Stress-70 protein, mitochondrial                                         | B                | - | 92371  | 68     | -   | 1(1)    | -      | 1(1)      | -    | 1%       | -   | KRY58424.1       |
|                                                                          | C                | - |        | 124    | -   | 3(3)    | -      | 3(3)      | -    | 3%       | -   |                  |
| Stress-activated protein kinase JNK                                      | -                | B | 60103  | -      | 70  | -       | 1(1)   | -         | 1(1) | -        | 1%  | KRY61292.1       |
| Stress-induced-phosphoprotein 1                                          | A                | - | 62843  | 77     | -   | 2(2)    | -      | 2(2)      | -    | 4%       | -   | KRY50814.1       |
|                                                                          | C                | C |        | 233    | 87  | 6(6)    | 2(2)   | 6(6)      | 2(2) | 12%      | 4%  |                  |
| Structural maintenance of chromosomes protein 3                          | B                | - | 180414 | 123    | -   | 4(3)    | -      | 4(3)      | -    | 2%       | -   | KRY53012.1       |
| Succinate dehydrogenase [ubiquinone] flavoprotein subunit, mitochondrial | C                | C | 97198  | 164    | 59  | 5(5)    | 1(1)   | 5(5)      | 1(1) | 6%       | 1%  | KRY54540.1       |
| Succinate-semialdehyde dehydrogenase, mitochondrial                      | B                | - | 63166  | 307    | -   | 9(9)    | -      | 9(9)      | -    | 19%      | -   | KRY54971.1       |
|                                                                          | -                | C |        | -      | 92  | -       | 3(3)   | -         | 3(3) | -        | 6%  |                  |
| Succinyl-CoA:3-ketoacid coenzyme A transferase 1, mitochondrial          | -                | C | 56551  | -      | 95  | -       | 1(1)   | -         | 1(1) | -        | 2%  | KRY54562.1       |
| Sulphydryl oxidase 1                                                     | C                | - | 109353 | 230    | -   | 7(7)    | -      | 5(5)      | -    | 5%       | -   | KRY58937.1       |
| Sulfide:quinone oxidoreductase, mitochondrial                            | A                | - | 54403  | 128    | -   | 2(2)    | -      | 2(2)      | -    | 5%       | -   | KRY46292.1       |
|                                                                          | B                | B |        | 105    | 109 | 3(3)    | 3(3)   | 3(3)      | 3(3) | 6%       | 7%  |                  |
|                                                                          | C                | - |        | 63     | -   | 1(1)    | -      | 1(1)      | -    | 2%       | -   |                  |
| Tau-tubulin kinase 1                                                     | -                | B | 114198 | -      | 70  | -       | 1(1)   | -         | 1(1) | -        | 0%  | KRY53389.1       |
| T-complex protein 1 subunit alpha                                        | C                | C | 79972  | 262    | 164 | 8(8)    | 3(3)   | 8(8)      | 3(3) | 11%      | 4%  | KRY49588.1       |
| T-complex protein 1 subunit beta                                         | B                | - | 59807  | 231    | -   | 6(6)    | -      | 6(6)      | -    | 15%      | -   | KRY52365.1       |
|                                                                          | C                | C |        | 395    | 91  | 13(12)  | 2(2)   | 12(11)    | 2(2) | 28%      | 4%  |                  |

| Protein name                                               | Presence in band |   | Mass    | Scores |     | Matches |        | Sequences |        | Coverage |     | Accession number |
|------------------------------------------------------------|------------------|---|---------|--------|-----|---------|--------|-----------|--------|----------|-----|------------------|
| T-complex protein 1 subunit delta, partial                 | B                | - | 25524   | 68     | -   | 1(1)    | -      | 1(1)      | -      | 3%       | -   | KRY50590.1       |
|                                                            | C                | - |         | 85     | -   | 1(1)    | -      | 1(1)      | -      | 5%       | -   |                  |
| T-complex protein 1 subunit epsilon                        | C                | C | 127413  | 847    | 61  | 22(22)  | 1(1)   | 18(18)    | 1(1)   | 17%      | 1%  | KRY50385.1       |
| T-complex protein 1 subunit eta                            | A                | - | 175156  | 115    | -   | 1(1)    | -      | 1(1)      | -      | 0%       | -   | KRY48081.1       |
|                                                            | -                | B |         | -      | 111 | -       | 1(1)   | -         | 1(1)   | -        | 0%  |                  |
|                                                            | -                | C |         | -      | 208 | -       | 6(6)   | -         | 6(6)   | -        | 4%  |                  |
|                                                            | C                | - | 175248  | 185    | -   | 2(2)    | -      | 2(2)      | -      | 1%       | -   | KRY48082.1       |
| T-complex protein 1 subunit gamma                          | B                | - | 60486   | 96     | -   | 1(1)    | -      | 1(1)      | -      | 2%       | -   | KRY47292.1       |
|                                                            | C                | C |         | 339    | 158 | 12(12)  | 4(3)   | 11(11)    | 4(3)   | 24%      | 8%  |                  |
| T-complex protein 1 subunit theta                          | B                | - | 151283  | 63     | -   | 1(1)    | -      | 1(1)      | -      | 1%       | -   | KRY50910.1       |
|                                                            | C                | C |         | 300    | 488 | 9(9)    | 13(13) | 9(9)      | 11(11) | 7%       | 8%  |                  |
| Tetraspanin-1, partial                                     | C                | - | 32574   | 73     | -   | 1(1)    | -      | 1(1)      | -      | 4%       | -   | KRY57011.1       |
| Thioredoxin reductase 1, cytoplasmic, partial              | -                | C | 141583  | -      | 84  | -       | 1(1)   | -         | 1(1)   | -        | 0%  | KRY57019.1       |
| Titin                                                      | B                | - | 1732268 | 109    | -   | 2(2)    | -      | 2(2)      | -      | 0%       | -   | KRY55434.1       |
| TOM1-like protein 2                                        | B                | - | 44804   | 67     | -   | 1(1)    | -      | 1(1)      | -      | 2%       | -   | KRY50457.1       |
| Transketolase                                              | -                | A | 140272  | -      | 85  | -       | 1(1)   | -         | 1(1)   | -        | 0%  | KRY48205.1       |
|                                                            | B                | - |         | 82     | -   | 1(1)    | -      | 1(1)      | -      | 0%       | -   |                  |
|                                                            | C                | C |         | 293    | 90  | 9(9)    | 2(2)   | 9(9)      | 2(2)   | 7%       | 1%  |                  |
| Transketolase-like protein 2                               | -                | A | 140714  | -      | 85  | -       | 1(1)   | -         | 1(1)   | -        | 0%  | KRY48207.1       |
|                                                            | -                | C |         | -      | 90  | -       | 2(2)   | -         | 2(2)   | -        | 1%  |                  |
| Translation initiation factor eIF-2B subunit beta          | -                | A | 40208   | -      | 78  | -       | 1(1)   | -         | 1(1)   | -        | 3%  | KRY60228.1       |
| Translocation protein SEC63 -like protein                  | C                | - | 127490  | 61     | -   | 1(1)    | -      | 1(1)      | -      | 1%       | -   | KRY52497.1       |
| Transmembrane protease serine 5                            | A                | A | 41206   | 127    | 293 | 3(3)    | 9(9)   | 3(3)      | 7(7)   | 10%      | 22% | KRY50806.1       |
|                                                            | -                | B |         | -      | 155 | -       | 3(3)   | -         | 3(3)   | -        | 11% |                  |
| Transmembrane protease serine 9                            | A                | A | 73208   | 91     | 117 | 1(1)    | 1(1)   | 1(1)      | 1(1)   | 2%       | 2%  | KRY59262.1       |
|                                                            | B                | - |         | 119    | -   | 2(2)    | -      | 2(2)      | -      | 4%       | -   |                  |
|                                                            | C                | - |         | 386    | -   | 10(10)  | -      | 6(6)      | -      | 10%      | -   |                  |
|                                                            | -                | B | 111650  | -      | 254 | -       | 3(3)   | -         | 3(3)   | -        | 5%  | KRY58843.1       |
|                                                            | -                | C |         | -      | 306 | -       | 7(7)   | -         | 6(6)   | -        | 8%  |                  |
| Transposon Tf2-6 polyprotein                               | -                | A | 186969  | -      | 78  | -       | 1(1)   | -         | 1(1)   | -        | 0%  | KRY45402.1       |
| Trifunctional enzyme subunit beta, mitochondrial           | A                | - | 47839   | 70     | -   | 1(1)    | -      | 1(1)      | -      | 2%       | -   | KRY48050.1       |
|                                                            | -                | B |         | -      | 66  | -       | 1(1)   | -         | 1(1)   | -        | 1%  |                  |
| tRNA-splicing ligase RtcB -like protein                    | -                | C | 57770   | -      | 98  | -       | 1(1)   | -         | 1(1)   | -        | 2%  | KRY54162.1       |
| Tubulin alpha-3 chain                                      | -                | B | 50322   | -      | 93  | -       | 2(2)   | -         | 2(2)   | -        | 4%  | KRY61018.1       |
|                                                            | B                | - | 50924   | 430    | -   | 7(7)    | -      | 7(7)      | -      | 25%      | -   | KRY50534.1       |
|                                                            | C                | C |         | 91     | 277 | 3(3)    | 9(9)   | 3(3)      | 8(8)   | 6%       | 21% |                  |
| Twitchin                                                   | B                | - | 712509  | 58     | -   | 1(1)    | -      | 1(1)      | -      | 0%       | -   | KRY50893.1       |
| Type I inositol 1,4,5-trisphosphate 5-phosphatase, partial | A                | - | 57850   | 148    | -   | 5(5)    | -      | 4(4)      | -      | 9%       | -   | KRY50866.1       |
|                                                            | -                | B | 53398   | -      | 92  | -       | 2(2)   | -         | 2(2)   | -        | 4%  | KRY50867.1       |
| Ubiquitin carboxyl-terminal hydrolase 14, partial          | -                | B | 57580   | -      | 77  | -       | 1(1)   | -         | 1(1)   | -        | 2%  | KRY58645.1       |
|                                                            | C                | - |         | 192    | -   | 5(5)    | -      | 4(4)      | -      | 9%       | -   |                  |
| Ubiquitin carboxyl-terminal hydrolase 15                   | -                | C | 155087  | -      | 93  | -       | 2(2)   | -         | 2(2)   | -        | 1%  | KRY54182.1       |

| Protein name                                                            | Presence in band |   | Mass   | Scores |     | Matches |      | Sequences |      | Coverage |     | Accession number |
|-------------------------------------------------------------------------|------------------|---|--------|--------|-----|---------|------|-----------|------|----------|-----|------------------|
| Ubiquitin carboxyl-terminal hydrolase 4                                 | -                | C | 163219 | -      | 93  | -       | 2(2) | -         | 2(2) | -        | 1%  | KRY54180.1       |
| Ubiquitin carboxyl-terminal hydrolase 7, partial                        | C                | - | 127949 | 61     | -   | 1(1)    | -    | 1(1)      | -    | 1%       | -   | KRY49807.1       |
| Ubiquitin-like modifier-activating enzyme 5                             | A                | - | 41307  | 68     | -   | 1(1)    | -    | 1(1)      | -    | 4%       | -   | KRY47667.1       |
| UDP-glucose 4-epimerase                                                 | A                | A | 86965  | 83     | 74  | 1(1)    | 2(2) | 1(1)      | 2(2) | 1%       | 3%  | KRY59504.1       |
|                                                                         | -                | B |        | -      | 68  | -       | 1(1) | -         | 1(1) | -        | 1%  |                  |
| UDP-N-acetylhexosamine pyrophosphorylase                                | B                | - | 84084  | 68     | -   | 1(1)    | -    | 1(1)      | -    | 1%       | -   | KRY50795.1       |
|                                                                         | -                | C |        | -      | 68  | -       | 1(1) | -         | 1(1) | -        | 1%  |                  |
| Uncharacterized protein T03_9851                                        | B                | B | 42427  | 490    | 263 | 11(11)  | 6(5) | 5(5)      | 4(3) | 23%      | 16% | KRY58607.1       |
| Uridine 5'-monophosphate synthase                                       | B                | - | 108908 | 70     | -   | 1(1)    | -    | 1(1)      | -    | 0%       | -   | KRY46591.1       |
| UTP--glucose-1-phosphate uridylyltransferase, partial                   | -                | B | 154987 | -      | 75  | -       | 1(1) | -         | 1(1) | -        | 0%  | KRY53918.1       |
| UV excision repair protein RAD23 -like protein B, partial               | -                | C | 53628  | -      | 131 | -       | 2(2) | -         | 2(2) | -        | 6%  | KRY52283.1       |
| Vacuolar protein sorting-associated protein 26B                         | B                | - | 215378 | 86     | -   | 1(1)    | -    | 1(1)      | -    | 1%       | -   | KRY53691.1       |
| Vacuolar protein sorting-associated protein 45                          | C                | - | 161398 | 123    | -   | 3(3)    | -    | 3(3)      | -    | 2%       | -   | KRY55296.1       |
| Vacuolar protein sorting-associated protein 4A, partial                 | -                | C | 56812  | -      | 58  | -       | 1(1) | -         | 1(1) | -        | 2%  | KRY53888.1       |
| Very long-chain specific acyl-CoA dehydrogenase, mitochondrial, partial | C                | - | 70153  | 245    | -   | 10(10)  | -    | 9(9)      | -    | 14%      | -   | KRY52870.1       |
| V-type proton ATPase subunit C, partial                                 | -                | A | 42184  | -      | 87  | -       | 1(1) | -         | 1(1) | -        | 3%  | KRY54431.1       |
| Xaa-Pro aminopeptidase 1, partial                                       | C                | - | 74254  | 115    | -   | 2(2)    | -    | 2(2)      | -    | 3%       | -   | KRY57414.1       |
