# Supplementary material for: Immunoproteomic Analysis of Trichinella britovi Proteins Recognized by IgG Antibodies from Meat Juice of Carnivores Naturally Infected with T. britovi
Source: MDPI journal article supplement (doi:10.3390/pathogens11101155), 2022-10-06
Supplement: s1 [file s1]

Table S2. Results of the LC-MS/MS analysis of selected gel fragments for three examined raccoon dogs: R1, R2 and R3.

| Protein name                                                              | Presence in band no. |    |    | Mass   | Scores |     |     | Matches |      |        | Sequences |      |        | Coverage |     |     | Accession number |
|---------------------------------------------------------------------------|----------------------|----|----|--------|--------|-----|-----|---------|------|--------|-----------|------|--------|----------|-----|-----|------------------|
|                                                                           | R1                   | R2 | R3 |        | R1     | R2  | R3  | R1      | R2   | R3     | R1        | R2   | R3     | R1       | R2  | R3  |                  |
| 1,4-alpha-glucan-branching enzyme                                         | C                    | -  | -  | 155692 | 71     | -   | -   | 1(1)    | -    | -      | 1(1)      | -    | -      | 1%       | -   | -   | KRY55089.1       |
|                                                                           | D                    | -  | -  |        | 62     | -   | -   | 1(1)    | -    | -      | 1(1)      | -    | -      | 1%       | -   | -   |                  |
|                                                                           | -                    | C  | -  | 160167 | -      | 64  | -   | -       | 1(1) | -      | -         | 1(1) | -      | -        | 0%  | -   | KRY55088.1       |
| 1,5-anhydro-D-fructose reductase                                          | A                    | -  | -  | 37989  | 169    | -   | -   | 2(2)    | -    | -      | 2(2)      | -    | -      | 10%      | -   | -   | KRY43899.1       |
|                                                                           | B                    | B  | B  |        | 66     | 107 | 144 | 1(1)    | 2(1) | 2(2)   | 1(1)      | 2(1) | 2(2)   | 2%       | 11% | 9%  |                  |
|                                                                           | C                    | C  | C  |        | 131    | 80  | 121 | 1(1)    | 1(1) | 2(2)   | 1(1)      | 1(1) | 2(2)   | 6%       | 2%  | 11% |                  |
|                                                                           | D                    | -  | -  |        | 204    | -   | -   | 2(2)    | -    | -      | 2(2)      | -    | -      | 10%      | -   | -   |                  |
|                                                                           | -                    | -  | E  |        | -      | -   | 63  | -       | -    | 1(1)   | -         | -    | 1(1)   | -        | -   | 2%  |                  |
|                                                                           | -                    | -  | F  |        | -      | -   | 65  | -       | -    | 1(1)   | -         | -    | 1(1)   | -        | -   | 2%  |                  |
| 1-phosphatidylinositol 4,5-bisphosphate phosphodiesterase beta-4, partial | D                    | -  | -  | 145873 | 75     | -   | -   | 1(1)    | -    | -      | 1(1)      | -    | -      | 0%       | -   | -   | KRY59603.1       |
|                                                                           | -                    | D  | -  | 140352 | -      | 114 | -   | -       | 2(2) | -      | -         | 2(2) | -      | -        | 1%  | -   | KRY59604.1       |
| 2,3-bisphosphoglycerate-independent phosphoglycerate mutase               | A                    | A  | A  | 59212  | 187    | 131 | 154 | 4(3)    | 4(4) | 5(5)   | 4(3)      | 4(4) | 5(5)   | 10%      | 9%  | 10% | KRY48325.1       |
|                                                                           | B                    | B  | B  |        | 86     | 138 | 200 | 2(2)    | 4(4) | 6(6)   | 2(2)      | 4(4) | 6(6)   | 3%       | 8%  | 15% |                  |
|                                                                           | C                    | C  | -  |        | 336    | 257 | -   | 10(10)  | 8(8) | -      | 10(10)    | 7(7) | -      | 21%      | 13% | -   |                  |
|                                                                           | D                    | D  | D  |        | 247    | 198 | 72  | 7(7)    | 5(5) | 1(1)   | 7(7)      | 5(5) | 1(1)   | 16%      | 12% | 2%  |                  |
|                                                                           | -                    | -  | E  |        | -      | -   | 220 | -       | -    | 6(6)   | -         | -    | 6(6)   | -        | -   | 12% |                  |
|                                                                           | -                    | -  | F  |        | -      | -   | 127 | -       | -    | 2(2)   | -         | -    | 2(2)   | -        | -   | 4%  |                  |
|                                                                           | -                    | -  | G  |        | -      | -   | 92  | -       | -    | 2(2)   | -         | -    | 2(2)   | -        | -   | 4%  |                  |
| 26S protease regulatory subunit 10B                                       | A                    | A  | A  | 55162  | 150    | 184 | 160 | 2(2)    | 5(5) | 3(3)   | 2(2)      | 5(5) | 3(3)   | 5%       | 12% | 8%  | KRY59566.1       |
|                                                                           | B                    | B  | B  |        | 210    | 247 | 364 | 6(6)    | 9(8) | 11(11) | 6(6)      | 9(8) | 10(10) | 14%      | 21% | 24% |                  |
|                                                                           | D                    | -  | -  |        | 96     | -   | -   | 1(1)    | -    | -      | 1(1)      | -    | -      | 3%       | -   | -   |                  |
| 26S protease regulatory subunit 4, partial                                | A                    | -  | -  | 77301  | 73     | -   | -   | 1(1)    | -    | -      | 1(1)      | -    | -      | 1%       | -   | -   | KRY52921.1       |
|                                                                           | B                    | B  | B  |        | 90     | 94  | 93  | 1(1)    | 2(2) | 2(2)   | 1(1)      | 2(2) | 2(2)   | 1%       | 3%  | 3%  |                  |
| 26S protease regulatory subunit 6B                                        | B                    | B  | -  | 40507  | 78     | 105 | -   | 1(1)    | 2(2) | -      | 1(1)      | 2(2) | -      | 2%       | 6%  | -   | KRY48180.1       |
| 26S proteasome non-ATPase regulatory subunit 1, partial                   | -                    | D  | -  | 125778 | -      | 80  | -   | -       | 1(1) | -      | -         | 1(1) | -      | -        | 0%  | -   | KRY58375.1       |
|                                                                           | -                    | -  | E  |        | -      | -   | 246 | -       | -    | 6(6)   | -         | -    | 5(5)   | -        | -   | 6%  |                  |
|                                                                           | -                    | -  | D  | 119157 | -      | -   | 86  | -       | -    | 1(1)   | -         | -    | 1(1)   | -        | -   | 1%  | KRY58377.1       |
|                                                                           | -                    | -  | F  |        | -      | -   | 67  | -       | -    | 1(1)   | -         | -    | 1(1)   | -        | -   | 1%  |                  |
| 26S proteasome non-ATPase regulatory subunit 12                           | C                    | C  | -  | 67345  | 61     | 82  | -   | 1(1)    | 2(2) | -      | 1(1)      | 2(2) | -      | 1%       | 3%  | -   | KRY57716.1       |
| 26S proteasome non-ATPase regulatory subunit 3, partial                   | C                    | -  | C  | 59673  | 56     | -   | 127 | 1(0)    | -    | 1(1)   | 1(0)      | -    | 1(1)   | 2%       | -   | 4%  | KRY53037.1       |
|                                                                           | -                    | D  | -  |        | -      | 77  | -   | -       | 1(1) | -      | -         | 1(1) | -      | -        | 2%  | -   |                  |
|                                                                           | -                    | -  | G  |        | -      | -   | 78  | -       | -    | 1(1)   | -         | -    | 1(1)   | -        | -   | 2%  |                  |
|                                                                           | -                    | -  | B  |        | -      | -   | 163 | -       | -    | 4(4)   | -         | -    | 3(3)   | -        | -   | 6%  |                  |
| 26S proteasome non-ATPase regulatory subunit 4                            | C                    | -  | -  | 42698  | 79     | -   | -   | 1(1)    | -    | -      | 1(1)      | -    | -      | 4%       | -   | -   | KRY60873.1       |
| 26S proteasome non-ATPase regulatory subunit 6, partial                   | A                    | A  | A  | 50950  | 90     | 119 | 62  | 1(1)    | 3(3) | 1(1)   | 1(1)      | 3(3) | 1(1)   | 2%       | 6%  | 2%  | KRY50659.1       |
| 2-oxoglutarate dehydrogenase, mitochondrial, partial                      | -                    | -  | C  | 122337 | -      | -   | 61  | -       | -    | 1(1)   | -         | -    | 1(1)   | -        | -   | 1%  | KRY52012.1       |
|                                                                           | -                    | D  | D  |        | -      | 73  | 67  | -       | 1(1) | 1(1)   | -         | 1(1) | 1(1)   | -        | 1%  | 1%  |                  |
| 32 kDa beta-galactoside-binding lectin                                    | -                    | A  | A  | 31910  | -      | 99  | 81  | -       | 1(1) | 1(1)   | -         | 1(1) | 1(1)   | -        | 4%  | 4%  | KRY59236.1       |
|                                                                           | B                    | B  | B  |        | 123    | 91  | 99  | 2(2)    | 3(3) | 1(1)   | 2(2)      | 3(3) | 1(1)   | 9%       | 12% | 4%  |                  |
|                                                                           | C                    | C  | C  |        | 194    | 183 | 138 | 4(4)    | 3(3) | 3(3)   | 4(4)      | 3(3) | 3(3)   | 18%      | 14% | 12% |                  |
|                                                                           | D                    | D  | D  |        | 182    | 144 | 105 | 4(4)    | 3(3) | 3(3)   | 4(4)      | 3(3) | 3(3)   | 17%      | 12% | 12% |                  |
|                                                                           | -                    | -  | E  |        | -      | -   | 114 | -       | -    | 1(1)   | -         | -    | 1(1)   | -        | -   | 5%  |                  |
|                                                                           | -                    | -  | F  |        | -      | -   | 105 | -       | -    | 2(2)   | -         | -    | 2(2)   | -        | -   | 8%  |                  |
|                                                                           | -                    | -  | G  |        | -      | -   | 107 | -       | -    | 1(1)   | -         | -    | 1(1)   | -        | -   | 5%  |                  |

|                                                           |   |   |   |        |      |      |      |        |        |        |        |        |        |     |     |     |            |
|-----------------------------------------------------------|---|---|---|--------|------|------|------|--------|--------|--------|--------|--------|--------|-----|-----|-----|------------|
| 32 kDa beta-galactoside-binding lectin, partial           | A | - | A | 37367  | 113  | -    | 61   | 2(2)   | -      | 1(1)   | 2(2)   | -      | 1(1)   | 9%  | -   | 3%  | KRY52250.1 |
|                                                           | B | B | B |        | 85   | 89   | 103  | 1(1)   | 1(1)   | 4(4)   | 1(1)   | 1(1)   | 4(4)   | 3%  | 3%  | 11% |            |
|                                                           | C | - | C |        | 104  | -    | 118  | 3(3)   | -      | 4(4)   | 3(3)   | -      | 4(4)   | 10% | -   | 12% |            |
|                                                           | D | D | D |        | 93   | 103  | 93   | 1(1)   | 3(3)   | 1(1)   | 1(1)   | 3(3)   | 1(1)   | 3%  | 3%  | 3%  |            |
|                                                           | - | - | E |        | -    | -    | 89   | -      | -      | 1(1)   | -      | -      | 1(1)   | -   | -   | 3%  |            |
|                                                           | - | - | F |        | -    | -    | 97   | -      | -      | 2(2)   | -      | -      | 2(2)   | -   | -   | 6%  |            |
|                                                           | - | - | G |        | -    | -    | 95   | -      | -      | 2(2)   | -      | -      | 2(2)   | -   | -   | 6%  |            |
| 3-ketoacyl-CoA thiolase, mitochondrial                    | A | A | A | 42697  | 2573 | 950  | 1308 | 51(51) | 31(30) | 34(34) | 22(22) | 16(16) | 18(18) | 72% | 56% | 64% | KRY51064.1 |
|                                                           | B | B | B |        | 165  | 139  | 322  | 3(2)   | 5(5)   | 8(8)   | 3(2)   | 5(5)   | 7(7)   | 8%  | 15% | 28% |            |
|                                                           | C | C | C |        | 464  | 230  | 369  | 12(12) | 5(5)   | 6(6)   | 9(9)   | 5(5)   | 4(4)   | 40% | 13% | 17% |            |
|                                                           | D | D | D |        | 536  | 204  | 137  | 13(13) | 4(4)   | 3(3)   | 11(11) | 4(4)   | 3(3)   | 41% | 13% | 8%  |            |
|                                                           | - | - | E |        | -    | -    | 227  | -      | -      | 7(7)   | -      | -      | 6(6)   | -   | -   | 16% |            |
|                                                           | - | - | F |        | -    | -    | 143  | -      | -      | 3(3)   | -      | -      | 3(3)   | -   | -   | 10% |            |
|                                                           | - | - | G |        | -    | -    | 154  | -      | -      | 3(3)   | -      | -      | 3(3)   | -   | -   | 8%  |            |
| 40S ribosomal protein S13                                 | - | C | C | 25073  | -    | 60   | 61   | -      | 1(1)   | 1(1)   | -      | 1(1)   | 1(1)   | -   | 3%  | 3%  | KRY56989.1 |
| 40S ribosomal protein S18                                 | - | - | A | 26097  | -    | -    | 84   | -      | -      | 2(2)   | -      | -      | 2(2)   | -   | -   | 9%  | KRY55489.1 |
|                                                           | - | B | - |        | -    | 89   | -    | -      | 1(1)   | -      | -      | 1(1)   | -      | -   | 6%  | -   |            |
|                                                           | C | C | C |        | 75   | 97   | 77   | 1(1)   | 1(1)   | 1(1)   | 1(1)   | 1(1)   | 1(1)   | 4%  | 6%  | 4%  |            |
|                                                           | - | D | D |        | -    | 62   | 71   | -      | 1(1)   | 1(1)   | -      | 1(1)   | 1(1)   | -   | 4%  | 4%  |            |
|                                                           | - | - | E |        | -    | -    | 79   | -      | -      | 1(1)   | -      | -      | 1(1)   | -   | -   | 6%  |            |
|                                                           | - | - | G |        | -    | -    | 110  | -      | -      | 1(1)   | -      | -      | 1(1)   | -   | -   | 6%  |            |
| 40S ribosomal protein S3                                  | C | C | - | 38314  | 77   | 74   | -    | 1(1)   | 2(2)   | -      | 1(1)   | 2(2)   | -      | 5%  | 6%  | -   | KRY60420.1 |
|                                                           | D | D | D |        | 91   | 59   | 108  | 3(3)   | 1(1)   | 1(1)   | 3(3)   | 1(1)   | 1(1)   | 8%  | 2%  | 3%  |            |
|                                                           | - | - | G |        | -    | -    | 67   | -      | -      | 1(1)   | -      | -      | 1(1)   | -   | -   | 2%  |            |
| 40S ribosomal protein S3a, partial                        | - | - | C | 32687  | -    | -    | 59   | -      | -      | 1(1)   | -      | -      | 1(1)   | -   | -   | 2%  | KRY56687.1 |
|                                                           | D | - | - |        | 130  | -    | -    | 1(1)   | -      | -      | 1(1)   | -      | -      | 6%  | -   | -   |            |
| 40S ribosomal protein S4                                  | D | - | - | 31072  | 58   | -    | -    | 1(1)   | -      | -      | 1(1)   | -      | -      | 3%  | -   | -   | KRY48988.1 |
| 40S ribosomal protein S5, partial                         | C | C | - | 24818  | 104  | 66   | -    | 1(1)   | 1(1)   | -      | 1(1)   | 1(1)   | -      | 6%  | 6%  | -   | KRY49420.1 |
|                                                           | D | - | - |        | 110  | -    | -    | 1(1)   | -      | -      | 1(1)   | -      | -      | 6%  | -   | -   |            |
| 40S ribosomal protein S8                                  | C | C | C | 72413  | 82   | 98   | 78   | 1(1)   | 1(1)   | 2(2)   | 1(1)   | 1(1)   | 2(2)   | 2%  | 2%  | 2%  | KRY60196.1 |
| 40S ribosomal protein S9                                  | C | - | - | 26490  | 75   | -    | -    | 1(1)   | -      | -      | 1(1)   | -      | -      | 4%  | -   | -   | KRY47012.1 |
|                                                           | D | - | - |        | 76   | -    | -    | 1(1)   | -      | -      | 1(1)   | -      | -      | 4%  | -   | -   |            |
|                                                           | - | - | G |        | -    | -    | 75   | -      | -      | 1(1)   | -      | -      | 1(1)   | -   | -   | 4%  |            |
| 4-hydroxybutyrate coenzyme A transferase, partial         | A | A | A | 53804  | 161  | 116  | 169  | 6(6)   | 3(3)   | 6(6)   | 5(5)   | 3(3)   | 5(5)   | 10% | 5%  | 10% | KRY56869.1 |
|                                                           | B | B | B |        | 271  | 265  | 352  | 10(10) | 9(9)   | 14(14) | 10(10) | 8(8)   | 11(11) | 19% | 18% | 22% |            |
|                                                           | - | C | C |        | -    | 90   | 61   | -      | 1(1)   | 1(1)   | -      | 1(1)   | 1(1)   | -   | 2%  | 2%  |            |
|                                                           | - | - | E |        | -    | -    | 72   | -      | -      | 1(1)   | -      | -      | 1(1)   | -   | -   | 1%  |            |
| 4-hydroxyphenylpyruvate dioxygenase                       | - | A | - | 44422  | -    | 82   | -    | -      | 2(2)   | -      | -      | 2(2)   | -      | -   | 6%  | -   | KRY55837.1 |
| 5'-3' exoribonuclease 1                                   | - | C | C | 237195 | -    | 80   | 106  | -      | 1(1)   | 1(1)   | -      | 1(1)   | 1(1)   | -   | 0%  | 0%  | KRY61082.1 |
| 5'-AMP-activated protein kinase catalytic subunit alpha-2 | C | C | - | 94860  | 165  | 94   | -    | 2(2)   | 1(1)   | -      | 1(1)   | 1(1)   | -      | 2%  | 2%  | -   | KRY53623.1 |
| 60 kDa heat shock protein, mitochondrial                  | A | A | A | 158357 | 385  | 224  | 332  | 10(10) | 8(7)   | 9(9)   | 9(9)   | 8(7)   | 9(9)   | 8%  | 7%  | 8%  | KRY51676.1 |
|                                                           | B | B | B |        | 155  | 198  | 243  | 5(5)   | 7(7)   | 8(8)   | 5(5)   | 7(7)   | 8(8)   | 4%  | 6%  | 7%  |            |
|                                                           | C | C | C |        | 1293 | 1316 | 482  | 35(35) | 31(31) | 15(15) | 26(26) | 24(24) | 15(15) | 20% | 21% | 12% |            |
|                                                           | D | D | - |        | 83   | 89   | -    | 2(2)   | 1(1)   | -      | 2(2)   | 1(1)   | -      | 2%  | 1%  | -   |            |
|                                                           | - | - | E |        | -    | -    | 112  | -      | -      | 3(3)   | -      | -      | 3(3)   | -   | -   | 2%  |            |
|                                                           | - | - | F |        | -    | -    | 79   | -      | -      | 1(1)   | -      | -      | 1(1)   | -   | -   | 0%  |            |
| 60 kDa SS-A/Ro ribonucleoprotein, partial                 | C | C | C | 69458  | 631  | 577  | 698  | 14(13) | 14(14) | 17(17) | 10(9)  | 11(11) | 11(11) | 24% | 26% | 25% | KRY47029.1 |
|                                                           | D | - | - |        | 64   | -    | -    | 1(1)   | -      | -      | 1(1)   | -      | -      | 1%  | -   | -   |            |
| 60S acidic ribosomal protein P0                           | A | A | A | 32092  | 145  | 62   | 144  | 2(2)   | 1(0)   | 3(3)   | 2(2)   | 1(0)   | 3(3)   | 8%  | 4%  | 13% | KRY54528.1 |

|                                             |   |   |   |        |      |     |     |        |      |        |        |      |        |     |     |     |            |
|---------------------------------------------|---|---|---|--------|------|-----|-----|--------|------|--------|--------|------|--------|-----|-----|-----|------------|
|                                             | - | B | B |        | -    | 94  | 111 | -      | 1(1) | 1(1)   | -      | 1(1) | 1(1)   | -   | 3%  | 3%  |            |
|                                             | C | C | - |        | 103  | 138 | -   | 2(2)   | 2(2) | -      | 2(2)   | 2(2) | -      | 8%  | 9%  | -   |            |
|                                             | D | D | - |        | 69   | 93  | -   | 2(2)   | 1(1) | -      | 2(2)   | 1(1) | -      | 7%  | 5%  | -   |            |
|                                             | - | - | E |        | -    | -   | 119 | -      | -    | 1(1)   | -      | -    | 1(1)   | -   | -   | 5%  |            |
|                                             | - | - | F |        | -    | -   | 67  | -      | -    | 1(1)   | -      | -    | 1(1)   | -   | -   | 4%  |            |
| 60S ribosomal protein L15                   | C | C | - | 84126  | 68   | 104 | -   | 1(1)   | 1(1) | -      | 1(1)   | 1(1) | -      | 1%  | 1%  | -   | KRY49952.1 |
|                                             | - | - | F |        | -    | -   | 89  | -      | -    | 1(1)   | -      | -    | 1(1)   | -   | -   | 1%  |            |
|                                             | - | - | G |        | -    | -   | 112 | -      | -    | 2(2)   | -      | -    | 2(2)   | -   | -   | 3%  |            |
| 60S ribosomal protein L17, partial          | - | D | - | 146568 | -    | 66  | -   | -      | 1(1) | -      | -      | 1(1) | -      | -   | 0%  | -   | KRY50982.1 |
| 60S ribosomal protein L18a                  | - | - | C | 22864  | -    | -   | 66  | -      | -    | 1(1)   | -      | -    | 1(1)   | -   | -   | 5%  | KRY60168.1 |
|                                             | - | - | G |        | -    | -   | 63  | -      | -    | 1(1)   | -      | -    | 1(1)   | -   | -   | 4%  |            |
| 60S ribosomal protein L3                    | A | A | A | 34644  | 111  | 83  | 88  | 5(5)   | 5(4) | 3(3)   | 5(5)   | 5(4) | 3(3)   | 15% | 14% | 8%  | KRY46416.1 |
|                                             | B | - | - |        | 64   | -   | -   | 2(2)   | -    | -      | 2(2)   | -    | -      | 5%  | -   | -   |            |
|                                             | D | - | - |        | 68   | -   | -   | 1(1)   | -    | -      | 1(1)   | -    | -      | 3%  | -   | -   |            |
|                                             | - | - | F |        | -    | -   | 68  | -      | -    | 1(1)   | -      | -    | 1(1)   | -   | -   | 3%  |            |
|                                             | - | - | G |        | -    | -   | 67  | -      | -    | 1(1)   | -      | -    | 1(1)   | -   | -   | 3%  |            |
| 60S ribosomal protein L4                    | - | A | - | 31108  | -    | 111 | -   | -      | 2(2) | -      | -      | 2(2) | -      | -   | 8%  | -   | KRY61057.1 |
|                                             | C | - | C |        | 70   | -   | 60  | 1(1)   | -    | 1(1)   | 1(1)   | -    | 1(1)   | 3%  | -   | 3%  |            |
|                                             | - | D | - |        | -    | 64  | -   | -      | 1(1) | -      | -      | 1(1) | -      | -   | 1%  | -   |            |
|                                             | - | - | E |        | -    | -   | 65  | -      | -    | 1(1)   | -      | -    | 1(1)   | -   | -   | 3%  |            |
|                                             | - | - | G |        | -    | -   | 67  | -      | -    | 2(1)   | -      | -    | 2(1)   | -   | -   | 5%  |            |
| 60S ribosomal protein L4, partial           | - | - | A | 34612  | -    | -   | 99  | -      | -    | 4(4)   | -      | -    | 4(4)   | -   | -   | 13% | KRY61059.1 |
| 60S ribosomal protein L7a                   | - | - | B | 48759  | -    | -   | 78  | -      | -    | 1(1)   | -      | -    | 1(1)   | -   | -   | 3%  | KRY60094.1 |
|                                             | C | - | C |        | 99   | -   | 83  | 1(1)   | -    | 1(1)   | 1(1)   | -    | 1(1)   | 3%  | -   | 3%  |            |
|                                             | D | - | - |        | 79   | -   | -   | 1(1)   | -    | -      | 1(1)   | -    | -      | 3%  | -   | -   |            |
| 6-phosphofructokinase                       | - | C | C | 94935  | -    | 96  | 109 | -      | 1(1) | 1(1)   | -      | 1(1) | 1(1)   | -   | 2%  | 2%  | KRY50273.1 |
|                                             | - | D | - |        | -    | 71  | -   | -      | 1(1) | -      | -      | 1(1) | -      | -   | 1%  | -   |            |
|                                             | - | - | G |        | -    | -   | 69  | -      | -    | 1(1)   | -      | -    | 1(1)   | -   | -   | 1%  |            |
| Acetolactate synthase-like protein          | C | - | - | 69865  | 63   | -   | -   | 1(1)   | -    | -      | 1(1)   | -    | -      | 1%  | -   | -   | KRY51410.1 |
| Acetyl-CoA acetyltransferase, mitochondrial | - | A | A | 43775  | -    | 89  | 68  | -      | 2(2) | 1(1)   | -      | 2(2) | 1(1)   | -   | 5%  | 2%  | KRY60246.1 |
| Actin-interacting protein 1                 | A | - | - | 71319  | 96   | -   | -   | 2(2)   | -    | -      | 2(2)   | -    | -      | 3%  | -   | -   | KRY51005.1 |
|                                             | C | - | C |        | 1107 | -   | 737 | 29(28) | -    | 21(21) | 26(25) | -    | 19(19) | 49% | -   | 37% |            |
| Actin-like protein 6A                       | B | - | - | 120874 | 94   | -   | -   | 1(1)   | -    | -      | 1(1)   | -    | -      | 0%  | -   | -   | KRY56723.1 |
| Actin-related protein 2, partial            | - | A | - | 155475 | -    | 88  | -   | -      | 1(1) | -      | -      | 1(1) | -      | -   | 0%  | -   | KRY53921.1 |
|                                             | B | - | B |        | 69   | -   | 75  | 1(1)   | -    | 1(1)   | 1(1)   | -    | 1(1)   | 0%  | -   | 1%  |            |
|                                             | - | - | E |        | -    | -   | 83  | -      | -    | 1(1)   | -      | -    | 1(1)   | -   | -   | 0%  |            |
|                                             | - | - | G |        | -    | -   | 64  | -      | -    | 1(1)   | -      | -    | 1(1)   | -   | -   | 0%  |            |
| Actin-related protein 2/3 complex subunit 2 | A | A | A | 132079 | 230  | 255 | 249 | 5(5)   | 8(7) | 5(5)   | 5(5)   | 8(7) | 5(5)   | 5%  | 6%  | 5%  | KRY56438.1 |
|                                             | - | B | B |        | -    | 91  | 82  | -      | 1(1) | 1(1)   | -      | 1(1) | 1(1)   | -   | 0%  | 1%  |            |
|                                             | C | C | C |        | 141  | 66  | 124 | 2(2)   | 1(1) | 2(2)   | 2(2)   | 1(1) | 2(2)   | 2%  | 1%  | 1%  |            |
|                                             | D | D | - |        | 153  | 120 | -   | 3(3)   | 2(2) | -      | 3(3)   | 2(2) | -      | 3%  | 1%  | -   |            |
| Actin-related protein 3                     | A | - | - | 128876 | 61   | -   | -   | 1(1)   | -    | -      | 1(1)   | -    | -      | 1%  | -   | -   | KRY47903.1 |
|                                             | - | - | B |        | -    | -   | 62  | -      | -    | 1(1)   | -      | -    | 1(1)   | -   | -   | 1%  |            |
| Adducin-related protein 1                   | - | A | A | 80242  | -    | 94  | 68  | -      | 1(1) | 1(1)   | -      | 1(1) | 1(1)   | -   | 1%  | 1%  | KRY47021.1 |
|                                             | B | B | B |        | 94   | 101 | 199 | 2(2)   | 2(2) | 5(5)   | 2(2)   | 2(2) | 5(5)   | 3%  | 3%  | 9%  |            |
|                                             | C | C | C |        | 96   | 144 | 111 | 3(3)   | 5(5) | 3(3)   | 3(3)   | 5(5) | 3(3)   | 4%  | 7%  | 5%  |            |
|                                             | D | - | - |        | 76   | -   | -   | 1(1)   | -    | -      | 1(1)   | -    | -      | 1%  | -   | -   |            |
|                                             | - | - | E |        | -    | -   | 97  | -      | -    | 3(3)   | -      | -    | 3(3)   | -   | -   | 4%  |            |
|                                             | - | - | G |        | -    | -   | 90  | -      | -    | 1(1)   | -      | -    | 1(1)   | -   | -   | 1%  |            |

|                                                         |   |   |   |        |     |     |      |        |        |        |        |        |        |     |     |     |            |
|---------------------------------------------------------|---|---|---|--------|-----|-----|------|--------|--------|--------|--------|--------|--------|-----|-----|-----|------------|
| Adenylosuccinate lyase                                  | A | A | A | 185820 | 141 | 65  | 80   | 5(5)   | 1(1)   | 2(2)   | 5(5)   | 1(1)   | 2(2)   | 2%  | 0%  | 1%  | KRY47589.1 |
|                                                         | B | B | B |        | 751 | 804 | 1219 | 21(19) | 22(22) | 34(34) | 14(13) | 14(14) | 20(20) | 10% | 10% | 11% |            |
| Adenylosuccinate synthetase, partial                    | A | A | A | 50894  | 307 | 97  | 225  | 9(9)   | 2(2)   | 5(5)   | 9(9)   | 2(2)   | 5(5)   | 22% | 4%  | 12% | KRY50054.1 |
|                                                         | B | B | B |        | 218 | 234 | 200  | 7(7)   | 7(7)   | 5(5)   | 6(6)   | 7(7)   | 4(4)   | 15% | 17% | 9%  |            |
|                                                         | C | - | C |        | 73  | -   | 75   | 1(1)   | -      | 1(1)   | 1(1)   | -      | 1(1)   | 2%  | -   | 1%  |            |
|                                                         | D | D | D |        | 90  | 112 | 77   | 2(2)   | 2(2)   | 1(1)   | 2(2)   | 2(2)   | 1(1)   | 5%  | 5%  | 2%  |            |
|                                                         | - | - | E |        | -   | -   | 137  | -      | -      | 3(3)   | -      | -      | 3(3)   | -   | -   | 6%  |            |
|                                                         | - | - | F |        | -   | -   | 65   | -      | -      | 1(1)   | -      | -      | 1(1)   | -   | -   | 2%  |            |
|                                                         | - | - | G |        | -   | -   | 63   | -      | -      | 1(0)   | -      | -      | 1(0)   | -   | -   | 2%  |            |
| Adenylyl cyclase-associated protein 2                   | B | B | B | 88901  | 113 | 126 | 142  | 2(2)   | 3(3)   | 3(3)   | 2(2)   | 3(3)   | 3(3)   | 3%  | 5%  | 5%  | KRY58311.1 |
|                                                         | - | - | E |        | -   | -   | 74   | -      | -      | 1(1)   | -      | -      | 1(1)   | -   | -   | 1%  |            |
| ADP-ribose pyrophosphatase, mitochondrial               | A | A | - | 55835  | 150 | 145 | -    | 4(3)   | 4(3)   | -      | 4(3)   | 4(3)   | -      | 9%  | 9%  | -   | KRY50360.1 |
|                                                         | C | C | C | 58846  | 108 | 83  | 71   | 2(2)   | 1(1)   | 1(1)   | 2(2)   | 1(1)   | 1(1)   | 4%  | 2%  | 2%  | KRY48334.1 |
|                                                         | - | B | B | 55423  | -   | 123 | 165  | -      | 3(3)   | 4(4)   | -      | 3(3)   | 3(3)   | -   | 7%  | 7%  | KRY57225.1 |
|                                                         | - | D | - |        | -   | 90  | -    | -      | 2(2)   | -      | -      | 2(2)   | -      | -   | 4%  | -   |            |
| ADP-ribose pyrophosphatase, mitochondrial, partial      | B | B | B | 137379 | 144 | 125 | 185  | 4(4)   | 3(3)   | 4(4)   | 4(4)   | 2(2)   | 3(3)   | 1%  | 2%  | 3%  | KRY52752.1 |
|                                                         | C | C | C |        | 399 | 252 | 297  | 14(14) | 12(11) | 7(7)   | 10(10) | 10(9)  | 5(5)   | 9%  | 7%  | 4%  |            |
|                                                         | - | D | - |        | -   | 115 | -    | -      | 4(3)   | -      | -      | 4(3)   | -      | -   | 3%  | -   |            |
|                                                         | - | - | E |        | -   | -   | 93   | -      | -      | 1(1)   | -      | -      | 1(1)   | -   | -   | 0%  |            |
| Alanine aminotransferase 2                              | - | A | - | 63694  | -   | 98  | -    | -      | 1(1)   | -      | -      | 1(1)   | -      | -   | 2%  | -   | KRY55706.1 |
|                                                         | B | B | B |        | 102 | 139 | 118  | 1(1)   | 3(3)   | 2(1)   | 1(1)   | 3(3)   | 2(1)   | 2%  | 4%  | 3%  |            |
|                                                         | - | C | C |        | -   | 79  | 62   | -      | 1(1)   | 1(1)   | -      | 1(1)   | 1(1)   | -   | 2%  | 1%  |            |
|                                                         | - | - | E |        | -   | -   | 105  | -      | -      | 2(2)   | -      | -      | 2(2)   | -   | -   | 3%  |            |
|                                                         | - | - | F |        | -   | -   | 105  | -      | -      | 2(2)   | -      | -      | 2(2)   | -   | -   | 3%  |            |
|                                                         | - | - | G |        | -   | -   | 100  | -      | -      | 1(1)   | -      | -      | 1(1)   | -   | -   | 2%  |            |
| Alanine--tRNA ligase, cytoplasmic                       | D | - | - | 114270 | 139 | -   | -    | 3(3)   | -      | -      | 3(3)   | -      | -      | 4%  | -   | -   | KRY47973.1 |
|                                                         | - | - | G |        | -   | -   | 64   | -      | -      | 1(1)   | -      | -      | 1(1)   | -   | -   | 1%  |            |
| Aldehyde dehydrogenase, mitochondrial                   | - | - | B | 94777  | -   | -   | 62   | -      | -      | 1(1)   | -      | -      | 1(1)   | -   | -   | 1%  | KRY52913.1 |
|                                                         | - | C | - |        | -   | 65  | -    | -      | 1(1)   | -      | -      | 1(1)   | -      | -   | 1%  | -   |            |
| Alpha,alpha-trehalose-phosphate synthase[UDP-forming] 2 | - | - | E | 157392 | -   | -   | 67   | -      | -      | 1(1)   | -      | -      | 1(1)   | -   | -   | 1%  | KRY47139.1 |
| Alpha-actinin, sarcomeric                               | D | D | D | 105768 | 970 | 921 | 505  | 40(40) | 40(40) | 28(27) | 25(25) | 30(30) | 20(19) | 30% | 35% | 25% | KRY53594.1 |
| Alpha-L-fucosidase                                      | A | A | A | 55241  | 142 | 129 | 131  | 3(3)   | 5(5)   | 5(5)   | 3(3)   | 5(5)   | 5(5)   | 6%  | 10% | 10% | KRY54685.1 |
|                                                         | - | B | - |        | -   | 70  | -    | -      | 2(2)   | -      | -      | 2(2)   | -      | -   | 4%  | -   |            |
| Alpha-mannosidase 2C1, partial                          | - | D | - | 117975 | -   | 278 | -    | -      | 8(8)   | -      | -      | 8(8)   | -      | -   | 8%  | -   | KRY61141.1 |
|                                                         | - | - | E |        | -   | -   | 94   | -      | -      | 2(2)   | -      | -      | 2(2)   | -   | -   | 2%  |            |
| Angiotensin-converting enzyme                           | D | D | D | 105899 | 252 | 200 | 92   | 8(8)   | 4(4)   | 2(2)   | 8(8)   | 4(4)   | 2(2)   | 11% | 6%  | 2%  | KRY61047.1 |
|                                                         | - | - | E |        | -   | -   | 70   | -      | -      | 1(1)   | -      | -      | 1(1)   | -   | -   | 1%  |            |
| Ankyrin-2, partial                                      | - | B | B | 821521 | -   | 82  | 66   | -      | 1(1)   | 1(1)   | -      | 1(1)   | 1(1)   | -   | 0%  | 0%  | KRY56996.1 |
|                                                         | C | C | C |        | 200 | 229 | 150  | 3(3)   | 7(7)   | 3(3)   | 3(3)   | 7(7)   | 3(3)   | 0%  | 1%  | 0%  |            |
|                                                         | D | - | D |        | 320 | -   | 88   | 10(10) | -      | 1(1)   | 10(10) | -      | 1(1)   | 1%  | -   | 0%  |            |
|                                                         | - | - | E |        | -   | -   | 144  | -      | -      | 5(5)   | -      | -      | 5(5)   | -   | -   | 0%  |            |
|                                                         | - | - | F |        | -   | -   | 142  | -      | -      | 3(3)   | -      | -      | 3(3)   | -   | -   | 0%  |            |
|                                                         | - | - | G |        | -   | -   | 83   | -      | -      | 2(2)   | -      | -      | 2(2)   | -   | -   | 0%  |            |
| Antigen -like protein                                   | D | D | D | 157979 | 319 | 199 | 108  | 9(9)   | 8(8)   | 2(2)   | 9(9)   | 8(8)   | 2(2)   | 8%  | 6%  | 1%  | KRY50726.1 |
|                                                         | - | - | E |        | -   | -   | 90   | -      | -      | 2(2)   | -      | -      | 2(2)   | -   | -   | 1%  |            |
| AP-2 complex subunit alpha-2                            | - | - | C | 106493 | -   | -   | 71   | -      | -      | 1(1)   | -      | -      | 1(1)   | -   | -   | 1%  | KRY60602.1 |
|                                                         | D | D | - |        | 62  | 83  | -    | 1(1)   | 1(1)   | -      | 1(1)   | 1(1)   | -      | 1%  | 1%  | -   |            |
|                                                         | - | - | G |        | -   | -   | 82   | -      | -      | 1(1)   | -      | -      | 1(1)   | -   | -   | 1%  |            |
| AP-2 complex subunit beta                               | - | - | C | 106080 | -   | -   | 85   | -      | -      | 1(1)   | -      | -      | 1(1)   | -   | -   | 1%  | KRY52390.1 |

|                                                                     |   |   |   |        |     |     |     |        |        |        |        |        |      |     |     |     |            |
|---------------------------------------------------------------------|---|---|---|--------|-----|-----|-----|--------|--------|--------|--------|--------|------|-----|-----|-----|------------|
|                                                                     | D | D | D |        | 143 | 320 | 147 | 4(4)   | 8(8)   | 2(2)   | 4(4)   | 7(7)   | 2(2) | 5%  | 10% | 2%  |            |
|                                                                     | - | - | G |        | -   | -   | 77  | -      | -      | 1(1)   | -      | -      | 1(1) | -   | -   | 1%  |            |
| Apoptosis-inducing factor 1, mitochondrial                          | - | C | - | 69452  | -   | 66  | -   | -      | 1(1)   | -      | -      | 1(1)   | -    | -   | 1%  | -   | KRY56249.1 |
| Arrestin domain-containing protein 3, partial                       | - | B | B | 64593  | -   | 84  | 88  | -      | 1(1)   | 1(1)   | -      | 1(1)   | 1(1) | -   | 2%  | 2%  | KRY54875.1 |
| Asparagine--tRNA ligase, cytoplasmic                                | C | C | C | 101632 | 535 | 420 | 237 | 13(13) | 13(13) | 8(8)   | 12(12) | 11(11) | 7(7) | 16% | 14% | 8%  | KRY51836.1 |
| Aspartate aminotransferase, mitochondrial, partial                  | - | A | A | 47470  | -   | 132 | 143 | -      | 2(2)   | 3(3)   | -      | 2(2)   | 3(3) | -   | 7%  | 9%  | KRY49869.1 |
|                                                                     | D | - | - |        | 82  | -   | -   | 1(1)   | -      | -      | 1(1)   | -      | -    | 3%  | -   | -   |            |
| Aspartate--tRNA ligase, cytoplasmic                                 | B | B | B | 57949  | 87  | 90  | 154 | 1(1)   | 2(2)   | 4(4)   | 1(1)   | 2(2)   | 4(4) | 1%  | 4%  | 8%  | KRY49144.1 |
| Aspartate--tRNA ligase, mitochondrial                               | C | C | C | 70007  | 96  | 59  | 70  | 1(1)   | 1(0)   | 1(1)   | 1(1)   | 1(0)   | 1(1) | 1%  | 1%  | 1%  | KRY48162.1 |
| Aspartyl aminopeptidase                                             | B | B | B | 52372  | 152 | 272 | 441 | 4(4)   | 6(6)   | 10(10) | 4(4)   | 6(6)   | 8(8) | 10% | 16% | 26% | KRY46829.1 |
| Atlantin-2                                                          | C | C | C | 68364  | 183 | 103 | 182 | 5(5)   | 1(1)   | 3(3)   | 5(5)   | 1(1)   | 3(3) | 11% | 2%  | 6%  | KRY58631.1 |
| ATP synthase subunit alpha, mitochondrial, partial                  | A | A | A | 64231  | 86  | 93  | 128 | 1(1)   | 1(1)   | 2(2)   | 1(1)   | 1(1)   | 2(2) | 2%  | 1%  | 4%  | KRY49394.1 |
|                                                                     | B | B | B |        | 82  | 133 | 213 | 3(3)   | 1(1)   | 5(5)   | 3(3)   | 1(1)   | 5(5) | 5%  | 2%  | 11% |            |
|                                                                     | C | C | C |        | 204 | 184 | 130 | 5(5)   | 4(4)   | 3(3)   | 5(5)   | 4(4)   | 3(3) | 11% | 8%  | 6%  |            |
|                                                                     | D | D | - |        | 161 | 96  | -   | 4(4)   | 1(1)   | -      | 4(4)   | 1(1)   | -    | 9%  | 3%  | -   |            |
|                                                                     | - | - | E |        | -   | -   | 117 | -      | -      | 2(2)   | -      | -      | 2(2) | -   | -   | 4%  |            |
|                                                                     | - | - | F |        | -   | -   | 102 | -      | -      | 2(2)   | -      | -      | 2(2) | -   | -   | 4%  |            |
|                                                                     | - | - | G |        | -   | -   | 107 | -      | -      | 3(3)   | -      | -      | 3(3) | -   | -   | 7%  |            |
| ATPase family AAA domain-containing protein 3                       | - | C | C | 71288  | -   | 65  | 120 | -      | 1(1)   | 2(2)   | -      | 1(1)   | 2(2) | -   | 1%  | 3%  | KRY52366.1 |
| ATP-binding cassette sub-family E member 1, partial                 | C | C | C | 113463 | 94  | 149 | 234 | 2(2)   | 2(2)   | 9(9)   | 2(2)   | 2(2)   | 9(9) | 3%  | 3%  | 11% | KRY56471.1 |
| ATP-dependent RNA helicase DDX19A, partial                          | B | - | - | 114761 | 76  | -   | -   | 1(1)   | -      | -      | 1(1)   | -      | -    | 1%  | -   | -   | KRY47762.1 |
| ATP-dependent RNA helicase DDX3X                                    | - | C | C | 83346  | -   | 62  | 105 | -      | 1(1)   | 1(1)   | -      | 1(1)   | 1(1) | -   | 1%  | 1%  | KRY46364.1 |
| ATP-dependent RNA helicase DDX3Y                                    | C | C | C | 84608  | 77  | 75  | 99  | 1(1)   | 1(1)   | 2(2)   | 1(1)   | 1(1)   | 2(2) | 1%  | 1%  | 3%  | KRY57048.1 |
|                                                                     | - | - | E |        | -   | -   | 70  | -      | -      | 1(1)   | -      | -      | 1(1) | -   | -   | 1%  |            |
|                                                                     | - | - | G |        | -   | -   | 69  | -      | -      | 1(1)   | -      | -      | 1(1) | -   | -   | 1%  |            |
| Band 4.1-like protein 1, partial                                    | - | C | - | 79147  | -   | 65  | -   | -      | 1(1)   | -      | -      | 1(1)   | -    | -   | 1%  | -   | KRY54007.1 |
| Beta-hexosaminidase subunit alpha                                   | - | - | C | 63810  | -   | -   | 66  | -      | -      | 1(1)   | -      | -      | 1(1) | -   | -   | 1%  | KRY61443.1 |
|                                                                     | D | - | D |        | 70  | -   | 68  | 1(1)   | -      | 1(1)   | 1(1)   | -      | 1(1) | 1%  | -   | 1%  |            |
| BRCA1-A complex subunit BRE, partial                                | - | - | B | 52274  | -   | -   | 83  | -      | -      | 1(1)   | -      | -      | 1(1) | -   | -   | 2%  | KRY48007.1 |
| Breast cancer anti-estrogen resistance protein 1, partial           | - | B | - | 131710 | -   | 76  | -   | -      | 1(1)   | -      | -      | 1(1)   | -    | -   | 0%  | -   | KRY51653.1 |
|                                                                     | - | C | C |        | -   | 93  | 111 | -      | 1(1)   | 1(1)   | -      | 1(1)   | 1(1) | -   | 0%  | 0%  |            |
|                                                                     | - | - | E |        | -   | -   | 75  | -      | -      | 1(1)   | -      | -      | 1(1) | -   | -   | 0%  |            |
| C-1-tetrahydrofolate synthase, cytoplasmic                          | - | A | A | 125620 | -   | 72  | 82  | -      | 1(1)   | 1(1)   | -      | 1(1)   | 1(1) | -   | 0%  | 0%  | KRY60034.1 |
|                                                                     | - | B | B |        | -   | 76  | 82  | -      | 1(1)   | 1(1)   | -      | 1(1)   | 1(1) | -   | 0%  | 0%  |            |
|                                                                     | C | - | C |        | 82  | -   | 95  | 1(1)   | -      | 2(2)   | 1(1)   | -      | 2(2) | 0%  | -   | 1%  |            |
|                                                                     | D | D | D |        | 403 | 395 | 155 | 14(14) | 15(15) | 7(7)   | 14(14) | 14(14) | 7(7) | 14% | 13% | 6%  |            |
|                                                                     | - | - | E |        | -   | -   | 95  | -      | -      | 2(2)   | -      | -      | 2(2) | -   | -   | 1%  |            |
|                                                                     | - | - | G |        | -   | -   | 77  | -      | -      | 1(1)   | -      | -      | 1(1) | -   | -   | 0%  |            |
| Calcium-transporting ATPase sarcoplasmic/endoplasmic reticulum type | D | D | D | 123299 | 201 | 292 | 122 | 6(6)   | 10(10) | 4(3)   | 6(6)   | 8(8)   | 4(3) | 7%  | 9%  | 4%  | KRY56386.1 |
|                                                                     | - | - | E |        | -   | -   | 97  | -      | -      | 2(2)   | -      | -      | 2(2) | -   | -   | 2%  |            |
|                                                                     | - | - | F |        | -   | -   | 88  | -      | -      | 2(2)   | -      | -      | 2(2) | -   | -   | 1%  |            |
|                                                                     | - | - | G |        | -   | -   | 105 | -      | -      | 2(2)   | -      | -      | 2(2) | -   | -   | 2%  |            |
| Calnexin, partial                                                   | C | C | C | 66552  | 131 | 86  | 92  | 3(3)   | 2(1)   | 2(2)   | 3(3)   | 2(1)   | 2(2) | 6%  | 4%  | 3%  | KRY56739.1 |
| Calpain clp-1                                                       | B | B | B | 150994 | 80  | 87  | 80  | 1(1)   | 1(1)   | 1(1)   | 1(1)   | 1(1)   | 1(1) | 0%  | 0%  | 0%  | KRY60775.1 |
|                                                                     | C | C | C |        | 620 | 303 | 307 | 17(17) | 15(14) | 10(8)  | 11(11) | 11(11) | 7(6) | 10% | 10% | 6%  |            |
|                                                                     | D | D | D |        | 117 | 76  | 80  | 2(2)   | 1(1)   | 2(1)   | 2(2)   | 1(1)   | 2(1) | 2%  | 0%  | 1%  |            |
|                                                                     | - | - | E |        | -   | -   | 111 | -      | -      | 4(4)   | -      | -      | 4(4) | -   | -   | 3%  |            |
|                                                                     | - | - | F |        | -   | -   | 87  | -      | -      | 1(1)   | -      | -      | 1(1) | -   | -   | 0%  |            |
|                                                                     | - | - | G |        | -   | -   | 77  | -      | -      | 2(2)   | -      | -      | 2(2) | -   | -   | 1%  |            |

|                                                                |   |   |   |        |     |     |     |        |        |        |        |        |        |     |     |     |            |
|----------------------------------------------------------------|---|---|---|--------|-----|-----|-----|--------|--------|--------|--------|--------|--------|-----|-----|-----|------------|
| Calponin -like protein OV9M                                    | B | B | B | 90680  | 111 | 145 | 102 | 1(1)   | 4(4)   | 4(4)   | 1(1)   | 4(4)   | 4(4)   | 1%  | 5%  | 7%  | KRY53098.1 |
| Calponin -like protein OV9M, partial                           | - | - | A | 54494  | -   | -   | 85  | -      | -      | 2(2)   | -      | -      | 2(2)   | -   | -   | 5%  | KRY56611.1 |
|                                                                | B | - | B |        | 73  | -   | 236 | 1(1)   | -      | 5(5)   | 1(1)   | -      | 5(5)   | 2%  | -   | 16% |            |
|                                                                | - | - | C |        | -   | -   | 84  | -      | -      | 1(1)   | -      | -      | 1(1)   | -   | -   | 3%  |            |
| Calreticulin, partial                                          | A | A | A | 51118  | 294 | 256 | 212 | 4(4)   | 6(6)   | 4(4)   | 4(4)   | 6(6)   | 4(4)   | 15% | 16% | 13% | KRY53845.1 |
|                                                                | B | B | B |        | 375 | 510 | 486 | 8(8)   | 13(13) | 9(9)   | 7(7)   | 11(11) | 8(8)   | 21% | 37% | 33% |            |
|                                                                | C | - | - |        | 164 | -   | -   | 3(3)   | -      | -      | 3(3)   | -      | -      | 12% | -   | -   |            |
| Calsequestrin-1                                                | A | A | - | 60111  | 67  | 66  | -   | 3(2)   | 1(1)   | -      | 3(2)   | 1(1)   | -      | 6%  | 1%  | -   | KRY61439.1 |
|                                                                | B | B | B |        | 193 | 307 | 424 | 6(6)   | 10(10) | 15(15) | 5(5)   | 8(8)   | 10(10) | 10% | 16% | 22% |            |
| Calsyntenin-1, partial                                         | D | D | - | 111629 | 173 | 107 | -   | 2(2)   | 1(1)   | -      | 2(2)   | 1(1)   | -      | 3%  | 1%  | -   | KRY49690.1 |
| cAMP-dependent protein kinase catalytic subunit alpha, partial | A | - | - | 52893  | 68  | -   | -   | 1(1)   | -      | -      | 1(1)   | -      | -      | 1%  | -   | -   | KRY51804.1 |
| cAMP-dependent protein kinase regulatory subunit               | A | A | A | 47292  | 90  | 169 | 85  | 1(1)   | 2(2)   | 1(1)   | 1(1)   | 2(2)   | 1(1)   | 3%  | 7%  | 3%  | KRY58719.1 |
|                                                                | B | - | B |        | 104 | -   | 109 | 1(1)   | -      | 1(1)   | 1(1)   | -      | 1(1)   | 3%  | -   | 3%  |            |
|                                                                | - | - | C |        | -   | -   | 63  | -      | -      | 1(1)   | -      | -      | 1(1)   | -   | -   | 3%  |            |
| Carboxylesterase 4A                                            | C | - | - | 97483  | 69  | -   | -   | 1(1)   | -      | -      | 1(1)   | -      | -      | 1%  | -   | -   | KRY49050.1 |
| CCA tRNA nucleotidyltransferase 1, mitochondrial               | B | - | - | 86959  | 61  | -   | -   | 1(1)   | -      | -      | 1(1)   | -      | -      | 1%  | -   | -   | KRY45865.1 |
| Chymotrypsin-like elastase family member 2A, partial           | A | A | A | 46401  | 564 | 337 | 446 | 19(17) | 9(9)   | 12(12) | 15(14) | 7(7)   | 11(11) | 46% | 23% | 41% | KRY59723.1 |
| Chymotrypsinogen B                                             | C | C | C | 141902 | 225 | 136 | 74  | 5(5)   | 2(2)   | 2(2)   | 5(5)   | 2(2)   | 2(2)   | 5%  | 2%  | 1%  | KRY53598.1 |
| Clathrin heavy chain 1                                         | - | - | C | 196138 | -   | -   | 67  | -      | -      | 1(1)   | -      | -      | 1(1)   | -   | -   | 0%  | KRY52726.1 |
|                                                                | D | D | D |        | 95  | 97  | 96  | 1(1)   | 2(2)   | 2(2)   | 1(1)   | 2(2)   | 2(2)   | 0%  | 1%  | 1%  |            |
|                                                                | - | - | E |        | -   | -   | 205 | -      | -      | 5(5)   | -      | -      | 5(5)   | -   | -   | 3%  |            |
|                                                                | - | - | F |        | -   | -   | 221 | -      | -      | 6(6)   | -      | -      | 6(6)   | -   | -   | 4%  |            |
|                                                                | - | - | G |        | -   | -   | 184 | -      | -      | 4(4)   | -      | -      | 4(4)   | -   | -   | 2%  |            |
| Cleavage and polyadenylation specificity factor subunit 2      | B | B | - | 142890 | 97  | 95  | -   | 2(2)   | 2(2)   | -      | 2(2)   | 2(2)   | -      | 1%  | 1%  | -   | KRY53654.1 |
|                                                                | C | C | C |        | 333 | 165 | 181 | 11(11) | 5(5)   | 4(4)   | 10(10) | 5(5)   | 3(3)   | 11% | 4%  | 3%  |            |
| Cleavage stimulation factor subunit 3                          | B | - | - | 125680 | 94  | -   | -   | 1(1)   | -      | -      | 1(1)   | -      | -      | 0%  | -   | -   | KRY56722.1 |
| Coatomer subunit alpha, partial                                | - | - | E | 143838 | -   | -   | 124 | -      | -      | 2(2)   | -      | -      | 2(2)   | -   | -   | 1%  | KRY52848.1 |
|                                                                | - | - | F |        | -   | -   | 87  | -      | -      | 1(1)   | -      | -      | 1(1)   | -   | -   | 0%  |            |
|                                                                | - | - | G |        | -   | -   | 77  | -      | -      | 1(1)   | -      | -      | 1(1)   | -   | -   | 0%  |            |
| Coatomer subunit beta                                          | D | D | D | 168037 | 174 | 171 | 94  | 5(5)   | 3(3)   | 1(1)   | 5(5)   | 3(3)   | 1(1)   | 4%  | 3%  | 0%  | KRY60662.1 |
|                                                                | - | - | E |        | -   | -   | 73  | -      | -      | 1(1)   | -      | -      | 1(1)   | -   | -   | 0%  |            |
| Coatomer subunit beta', partial                                | D | - | - | 249362 | 116 | -   | -   | 3(3)   | -      | -      | 3(3)   | -      | -      | 1%  | -   | -   | KRY52263.1 |
|                                                                | - | - | E |        | -   | -   | 140 | -      | -      | 6(6)   | -      | -      | 6(6)   | -   | -   | 2%  |            |
| Coatomer subunit delta                                         | A | - | - | 63168  | 69  | -   | -   | 1(1)   | -      | -      | 1(1)   | -      | -      | 2%  | -   | -   | KRY53209.1 |
|                                                                | C | - | C |        | 129 | -   | 87  | 3(3)   | -      | 1(1)   | 3(3)   | -      | 1(1)   | 6%  | -   | 2%  |            |
| COP9 signalosome complex subunit                               | A | - | - | 195133 | 66  | -   | -   | 1(1)   | -      | -      | 1(1)   | -      | -      | 0%  | -   | -   | KRY61179.1 |
| COP9 signalosome complex subunit 4, partial                    | - | A | - | 47193  | -   | 92  | -   | -      | 1(1)   | -      | -      | 1(1)   | -      | -   | 2%  | -   | KRY48695.1 |
| Coronin-like protein cor-1                                     | A | A | A | 164005 | 94  | 99  | 80  | 1(1)   | 2(2)   | 1(1)   | 1(1)   | 2(2)   | 1(1)   | 0%  | 1%  | 0%  | KRY60446.1 |
|                                                                | - | - | B |        | -   | -   | 97  | -      | -      | 1(1)   | -      | -      | 1(1)   | -   | -   | 0%  |            |
|                                                                | C | C | C |        | 409 | 381 | 474 | 8(8)   | 6(6)   | 8(8)   | 8(8)   | 6(6)   | 7(7)   | 9%  | 7%  | 8%  |            |
| Cullin-associated nedd8-dissociated protein 1                  | - | - | G | 145189 | -   | -   | 74  | -      | -      | 1(1)   | -      | -      | 1(1)   | -   | -   | 0%  | KRY51041.1 |
| Cuticlin-1                                                     | A | - | - | 64300  | 68  | -   | -   | 1(1)   | -      | -      | 1(1)   | -      | -      | 1%  | -   | -   | KRY58751.1 |
| Cysteine and glycine-rich protein 1, partial                   | - | - | C | 28836  | -   | -   | 99  | -      | -      | 1(1)   | -      | -      | 1(1)   | -   | -   | 6%  | KRY56824.1 |
|                                                                | - | - | E |        | -   | -   | 104 | -      | -      | 1(1)   | -      | -      | 1(1)   | -   | -   | 6%  |            |
| Cysteine desulfurase, mitochondrial                            | B | B | B | 49103  | 130 | 78  | 124 | 2(2)   | 2(2)   | 3(2)   | 2(2)   | 2(2)   | 3(2)   | 6%  | 7%  | 8%  | KRY49825.1 |
| Cytochrome b-c1 complex subunit 2, mitochondrial, partial      | A | A | A | 54732  | 243 | 120 | 187 | 4(4)   | 3(3)   | 2(2)   | 4(4)   | 3(3)   | 2(2)   | 11% | 7%  | 5%  | KRY49815.1 |
|                                                                | B | B | B |        | 140 | 183 | 106 | 2(2)   | 3(3)   | 1(1)   | 2(2)   | 3(3)   | 1(1)   | 5%  | 8%  | 2%  |            |
| Cytosol aminopeptidase                                         | A | A | A | 57910  | 88  | 76  | 89  | 2(2)   | 1(1)   | 2(2)   | 2(2)   | 1(1)   | 2(2)   | 3%  | 1%  | 3%  | KRY54953.1 |

|                                                                                                                  |   |   |   |        |     |     |     |        |        |        |      |        |        |     |     |     |            |
|------------------------------------------------------------------------------------------------------------------|---|---|---|--------|-----|-----|-----|--------|--------|--------|------|--------|--------|-----|-----|-----|------------|
|                                                                                                                  | B | B | B |        | 139 | 90  | 219 | 4(4)   | 2(2)   | 7(7)   | 4(4) | 2(2)   | 7(7)   | 8%  | 3%  | 15% |            |
|                                                                                                                  | C | C | C |        | 260 | 149 | 101 | 6(6)   | 4(4)   | 3(3)   | 6(6) | 4(4)   | 3(3)   | 11% | 8%  | 5%  |            |
|                                                                                                                  | D | D | D |        | 179 | 161 | 71  | 5(5)   | 5(5)   | 1(1)   | 5(5) | 5(5)   | 1(1)   | 13% | 9%  | 2%  |            |
|                                                                                                                  | - | - | E |        | -   | -   | 78  | -      | -      | 1(1)   | -    | -      | 1(1)   | -   | -   | 1%  |            |
|                                                                                                                  | - | - | F |        | -   | -   | 103 | -      | -      | 4(4)   | -    | -      | 4(4)   | -   | -   | 8%  |            |
|                                                                                                                  | - | - | G |        | -   | -   | 99  | -      | -      | 3(3)   | -    | -      | 3(3)   | -   | -   | 5%  |            |
| Cytosolic non-specific dipeptidase                                                                               | C | - | - | 58585  | 69  | -   | -   | 1(1)   | -      | -      | 1(1) | -      | -      | 2%  | -   | -   | KRY53197.1 |
| Cytosolic purine 5'-nucleotidase                                                                                 | C | C | C | 124481 | 157 | 69  | 75  | 4(4)   | 1(1)   | 1(1)   | 4(4) | 1(1)   | 1(1)   | 3%  | 0%  | 0%  | KRY47033.1 |
| DDB1- and CUL4-associated factor 8                                                                               | - | - | C | 63244  | -   | -   | 85  | -      | -      | 1(1)   | -    | -      | 1(1)   | -   | -   | 2%  | KRY56217.1 |
| Deoxyribonuclease-2-alpha                                                                                        | B | B | B | 39748  | 338 | 205 | 408 | 7(7)   | 5(5)   | 10(10) | 7(7) | 5(5)   | 9(9)   | 26% | 16% | 32% | KRY53116.1 |
|                                                                                                                  | - | D | D | 116176 | -   | 667 | 249 | -      | 15(15) | 7(7)   | -    | 10(10) | 6(6)   | -   | 13% | 7%  |            |
|                                                                                                                  | - | - | E |        | -   | -   | 197 | -      | -      | 5(5)   | -    | -      | 5(5)   | -   | -   | 5%  |            |
|                                                                                                                  | - | - | F |        | -   | -   | 113 | -      | -      | 2(2)   | -    | -      | 2(2)   | -   | -   | 2%  |            |
| Deoxyribonuclease-2-beta                                                                                         | - | B | - | 40364  | -   | 205 | -   | -      | 5(5)   | -      | -    | 5(5)   | -      | -   | 16% | -   | KRY53117.1 |
| Dihydrolipoyl dehydrogenase, mitochondrial                                                                       | - | - | A | 58994  | -   | -   | 91  | -      | -      | 2(2)   | -    | -      | 2(2)   | -   | -   | 6%  | KRY53824.1 |
|                                                                                                                  | B | - | B |        | 94  | -   | 156 | 4(4)   | -      | 4(4)   | 4(4) | -      | 3(3)   | 6%  | -   | 5%  |            |
|                                                                                                                  | - | - | C |        | -   | -   | 67  | -      | -      | 2(1)   | -    | -      | 2(1)   | -   | -   | 3%  |            |
|                                                                                                                  | D | - | - |        | 92  | -   | -   | 2(2)   | -      | -      | 2(2) | -      | -      | 3%  | -   | -   |            |
| Dihydrolipoyllysine-residue acetyltransferase component of pyruvate dehydrogenase complex, mitochondrial         | - | A | A | 57120  | -   | 85  | 59  | -      | 1(1)   | 1(1)   | -    | 1(1)   | 1(1)   | -   | 1%  | 1%  | KRY46167.1 |
|                                                                                                                  | B | B | B |        | 159 | 100 | 143 | 3(3)   | 3(3)   | 5(4)   | 3(3) | 3(3)   | 5(4)   | 6%  | 4%  | 9%  |            |
|                                                                                                                  | C | - | - |        | 84  | -   | -   | 1(1)   | -      | -      | 1(1) | -      | -      | 1%  | -   | -   |            |
|                                                                                                                  | D | - | - |        | 120 | -   | -   | 1(1)   | -      | -      | 1(1) | -      | -      | 2%  | -   | -   |            |
|                                                                                                                  | - | - | E |        | -   | -   | 125 | -      | -      | 1(1)   | -    | -      | 1(1)   | -   | -   | 2%  |            |
| Dihydrolipoyllysine-residue succinyltransferase component of 2-oxoglutarate dehydrogenase complex, mitochondrial | A | - | - | 59790  | 144 | -   | -   | 3(3)   | -      | -      | 3(3) | -      | -      | 6%  | -   | -   | KRY53977.1 |
| Dihydropyrimidinase-related protein 3                                                                            | B | B | B | 86548  | 100 | 106 | 139 | 2(2)   | 2(2)   | 3(3)   | 2(2) | 2(2)   | 3(3)   | 2%  | 2%  | 4%  | KRY48683.1 |
|                                                                                                                  | C | C | C |        | 80  | 134 | 108 | 1(1)   | 3(3)   | 2(2)   | 1(1) | 3(3)   | 2(2)   | 1%  | 4%  | 3%  |            |
| Diphthine--ammonia ligase, partial                                                                               | A | A | A | 149815 | 104 | 67  | 106 | 1(1)   | 1(1)   | 2(2)   | 1(1) | 1(1)   | 2(2)   | 0%  | 0%  | 1%  | KRY47980.1 |
|                                                                                                                  | B | B | B |        | 104 | 112 | 204 | 1(1)   | 2(2)   | 4(4)   | 1(1) | 2(2)   | 3(3)   | 0%  | 1%  | 3%  |            |
|                                                                                                                  | C | C | C |        | 120 | 136 | 109 | 2(2)   | 3(3)   | 2(2)   | 2(2) | 3(3)   | 2(2)   | 1%  | 1%  | 1%  |            |
|                                                                                                                  | D | D | D |        | 557 | 412 | 267 | 11(11) | 7(7)   | 5(5)   | 5(5) | 3(3)   | 2(2)   | 7%  | 3%  | 2%  |            |
|                                                                                                                  | - | - | E |        | -   | -   | 91  | -      | -      | 1(1)   | -    | -      | 1(1)   | -   | -   | 0%  |            |
| Disks large -like protein 1                                                                                      | - | C | - | 103219 | -   | 62  | -   | -      | 1(1)   | -      | -    | 1(1)   | -      | -   | 1%  | -   | KRY57378.1 |
| DnaJ -like protein dnj-20                                                                                        | A | A | A | 45223  | 148 | 172 | 162 | 2(2)   | 3(3)   | 3(3)   | 2(2) | 3(3)   | 2(2)   | 7%  | 7%  | 7%  | KRY45252.1 |
| Dolichyl-diphosphooligosaccharide--protein glycosyltransferase 48 kDa subunit                                    | - | - | B | 85265  | -   | -   | 79  | -      | -      | 1(1)   | -    | -      | 1(1)   | -   | -   | 1%  | KRY46770.1 |
| Dolichyl-diphosphooligosaccharide--protein glycosyltransferase subunit 1                                         | C | C | C | 70258  | 87  | 73  | 123 | 3(3)   | 2(2)   | 5(5)   | 3(3) | 2(2)   | 5(5)   | 4%  | 3%  | 9%  | KRY49628.1 |
| Dolichyl-diphosphooligosaccharide--protein glycosyltransferase subunit 2                                         | C | C | C | 91066  | 392 | 359 | 322 | 9(9)   | 13(12) | 10(10) | 8(8) | 12(11) | 10(10) | 14% | 19% | 15% | KRY57029.1 |
| Drebrin-like protein                                                                                             | - | - | A | 121340 | -   | -   | 60  | -      | -      | 1(1)   | -    | -      | 1(1)   | -   | -   | 0%  | KRY46208.1 |
| Dual specificity mitogen-activated protein kinase kinase 3                                                       | - | C | C | 47059  | -   | 80  | 78  | -      | 1(1)   | 1(1)   | -    | 1(1)   | 1(1)   | -   | 3%  | 3%  | KRY61347.1 |
|                                                                                                                  | - | - | E |        | -   | -   | 69  | -      | -      | 1(1)   | -    | -      | 1(1)   | -   | -   | 3%  |            |
| Dymeclin                                                                                                         | - | - | C | 86333  | -   | -   | 78  | -      | -      | 1(1)   | -    | -      | 1(1)   | -   | -   | 1%  | KRY55372.1 |
| Dynamin                                                                                                          | - | D | D | 99981  | -   | 140 | 108 | -      | 8(8)   | 2(2)   | -    | 8(8)   | 2(2)   | -   | 9%  | 2%  | KRY57399.1 |
| Dynein heavy chain, cytoplasmic                                                                                  | A | A | A | 569784 | 146 | 112 | 128 | 4(4)   | 1(1)   | 3(3)   | 4(4) | 1(1)   | 3(3)   | 0%  | 0%  | 0%  | KRY59545.1 |
|                                                                                                                  | - | - | C |        | -   | -   | 65  | -      | -      | 1(1)   | -    | -      | 1(1)   | -   | -   | 0%  |            |
|                                                                                                                  | - | - | G | 568220 | -   | -   | 79  | -      | -      | 1(1)   | -    | -      | 1(1)   | -   | -   | 0%  | KRY59544.1 |
| E3 ubiquitin-protein ligase HUWE1                                                                                | - | - | E | 497021 | -   | -   | 69  | -      | -      | 1(1)   | -    | -      | 1(1)   | -   | -   | 0%  | KRY53411.1 |

|                                                                            |   |   |   |        |      |     |     |        |        |        |        |      |        |     |     |     |            |
|----------------------------------------------------------------------------|---|---|---|--------|------|-----|-----|--------|--------|--------|--------|------|--------|-----|-----|-----|------------|
|                                                                            | - | - | G |        | -    | -   | 75  | -      | -      | 1(1)   | -      | -    | 1(1)   | -   | -   | 0%  |            |
| E3 ubiquitin-protein ligase listerin                                       | - | - | G | 206888 | -    | -   | 76  | -      | -      | 1(1)   | -      | -    | 1(1)   | -   | -   | 0%  | KRY47160.1 |
| E3 ubiquitin-protein ligase UBR5                                           | D | - | - | 416466 | 127  | -   | -   | 1(1)   | -      | -      | 1(1)   | -    | -      | 0%  | -   | -   | KRY58314.1 |
| Ectonucleotide pyrophosphatase/phosphodiesterase C27A7.1                   | D | - | - | 89968  | 73   | -   | -   | 1(1)   | -      | -      | 1(1)   | -    | -      | 1%  | -   | -   | KRY49188.1 |
| Elongation factor 1-alpha                                                  | - | A | - | 54609  | -    | 631 | -   | -      | 18(18) | -      | -      | 9(9) | -      | -   | 29% | -   | KRY54798.1 |
|                                                                            | B | - | - |        | 952  | -   | -   | 23(23) | -      | -      | 12(12) | -    | -      | 39% | -   | -   |            |
|                                                                            | - | - | C |        | -    | -   | 261 | -      | -      | 9(9)   | -      | -    | 7(7)   | -   | -   | 19% |            |
|                                                                            | - | - | E |        | -    | -   | 219 | -      | -      | 5(5)   | -      | -    | 4(4)   | -   | -   | 11% |            |
|                                                                            | - | - | F |        | -    | -   | 136 | -      | -      | 3(3)   | -      | -    | 3(3)   | -   | -   | 6%  |            |
|                                                                            | - | - | G |        | -    | -   | 207 | -      | -      | 5(5)   | -      | -    | 4(4)   | -   | -   | -   |            |
| Elongation factor 1-gamma, partial                                         | B | B | B | 52493  | 77   | 92  | 79  | 1(1)   | 1(1)   | 1(1)   | 1(1)   | 1(1) | 1(1)   | 2%  | 3%  | 2%  | KRY58663.1 |
| Elongation factor G, mitochondrial                                         | - | B | - | 101076 | -    | 95  | -   | -      | 1(1)   | -      | -      | 1(1) | -      | -   | 1%  | -   | KRY55228.1 |
|                                                                            | C | C | C |        | 57   | 106 | 98  | 1(1)   | 2(2)   | 2(2)   | 1(1)   | 2(2) | 2(2)   | 1%  | 2%  | 2%  |            |
|                                                                            | D | D | - |        | 87   | 66  | -   | 1(1)   | 1(1)   | -      | 1(1)   | 1(1) | -      | 1%  | 1%  | -   |            |
| Elongation factor Ts, mitochondrial                                        | A | - | A | 71640  | 73   | -   | 60  | 2(2)   | -      | 1(1)   | 2(2)   | -    | 1(1)   | 3%  | -   | 1%  | KRY51161.1 |
| Elongation factor Tu, mitochondrial, partial                               | B | - | - | 55743  | 88   | -   | -   | 2(2)   | -      | -      | 2(2)   | -    | -      | 4%  | -   | -   | KRY60374.1 |
|                                                                            | - | - | E |        | -    | -   | 62  | -      | -      | 1(1)   | -      | -    | 1(1)   | -   | -   | 2%  |            |
| Endoplasmic oxidoreductin-1, partial                                       | - | - | B | 56076  | -    | -   | 88  | -      | -      | 1(1)   | -      | -    | 1(1)   | -   | -   | 2%  | KRY50205.1 |
| Endoplasmic reticulum resident protein 44                                  | A | A | A | 50147  | 81   | 100 | 106 | 1(1)   | 1(1)   | 1(1)   | 1(1)   | 1(1) | 1(1)   | 2%  | 2%  | 2%  | KRY50742.1 |
|                                                                            | B | B | B |        | 168  | 281 | 353 | 5(5)   | 8(7)   | 10(10) | 4(4)   | 5(5) | 5(5)   | 13% | 18% | 18% |            |
|                                                                            | D | D | - |        | 59   | 69  | -   | 1(1)   | 1(1)   | -      | 1(1)   | 1(1) | -      | 2%  | 2%  | -   |            |
| Endoplasmin, partial                                                       | A | A | A | 95730  | 352  | 224 | 247 | 7(7)   | 6(6)   | 7(7)   | 6(6)   | 5(5) | 6(6)   | 9%  | 8%  | 10% | KRY54651.1 |
|                                                                            | - | C | - |        | -    | 292 | -   | -      | 7(7)   | -      | -      | 7(7) | -      | -   | 11% | -   |            |
|                                                                            | D | - | D |        | 1925 | -   | 390 | 53(53) | -      | 19(18) | 35(35) | -    | 17(17) | 44% | -   | 14% |            |
| Enoyl-CoA delta isomerase 2, mitochondrial                                 | A | A | A | 47790  | 144  | 92  | 98  | 5(5)   | 3(2)   | 2(2)   | 4(4)   | 3(2) | 2(2)   | 11% | 8%  | 5%  | KRY48829.1 |
| Enoyl-CoA hydratase, mitochondrial                                         | A | - | A | 34086  | 147  | -   | 98  | 3(3)   | -      | 1(1)   | 3(3)   | -    | 1(1)   | 13% | -   | 4%  | KRY60485.1 |
|                                                                            | - | - | B |        | -    | -   | 85  | -      | -      | 1(1)   | -      | -    | 1(1)   | -   | -   | 4%  |            |
|                                                                            | C | C | C |        | 90   | 102 | 129 | 3(3)   | 3(3)   | 3(3)   | 3(3)   | 3(3) | 2(2)   | 15% | 12% | 7%  |            |
|                                                                            | D | D | - |        | 174  | 104 | -   | 2(2)   | 2(2)   | -      | 2(2)   | 2(2) | -      | 9%  | 7%  | -   |            |
|                                                                            | - | - | E |        | -    | -   | 69  | -      | -      | 1(1)   | -      | -    | 1(1)   | -   | -   | 3%  |            |
| Epsin-2                                                                    | C | - | - | 57740  | 65   | -   | -   | 1(1)   | -      | -      | 1(1)   | -    | -      | 2%  | -   | -   | KRY61379.1 |
| Eukaryotic initiation factor 4A, partial                                   | A | A | A | 252102 | 268  | 208 | 160 | 7(7)   | 5(5)   | 3(3)   | 6(6)   | 5(5) | 3(3)   | 3%  | 2%  | 1%  | KRY53637.1 |
|                                                                            | - | C | C |        | -    | 83  | 94  | -      | 1(1)   | 1(1)   | -      | 1(1) | 1(1)   | -   | 0%  | 0%  |            |
|                                                                            | D | C | - |        | 85   | 116 | -   | 1(1)   | 2(2)   | -      | 1(1)   | 2(2) | -      | 0%  | 1%  | -   |            |
|                                                                            | - | - | E |        | -    | -   | 73  | -      | -      | 1(1)   | -      | -    | 1(1)   | -   | -   | 0%  |            |
| Eukaryotic initiation factor 4A-III                                        | B | B | B | 123600 | 133  | 163 | 215 | 4(4)   | 6(6)   | 7(7)   | 4(4)   | 6(6) | 7(7)   | 4%  | 4%  | 6%  | KRY49326.1 |
|                                                                            | C | C | C |        | 165  | 65  | 127 | 3(3)   | 1(1)   | 2(1)   | 3(3)   | 1(1) | 2(1)   | 3%  | 1%  | 2%  |            |
| Eukaryotic peptide chain release factor GTP-binding subunit ERF3A, partial | C | - | - | 45762  | 156  | -   | -   | 2(2)   | -      | -      | 2(2)   | -    | -      | 8%  | -   | -   | KRY52451.1 |
| Eukaryotic peptide chain release factor GTP-binding subunit ERF3B          | C | - | - | 65245  | 156  | -   | -   | 2(2)   | -      | -      | 2(2)   | -    | -      | 6%  | -   | -   | KRY52453.1 |
| Eukaryotic peptide chain release factor subunit 1                          | - | - | B | 49470  | -    | -   | 89  | -      | -      | 1(1)   | -      | -    | 1(1)   | -   | -   | 2%  | KRY49983.1 |
| Eukaryotic translation initiation factor 3 subunit C                       | - | C | - | 122944 | -    | 71  | -   | -      | 1(1)   | -      | -      | 1(1) | -      | -   | 0%  | -   | KRY47525.1 |
|                                                                            | - | D | - |        | -    | 62  | -   | -      | 1(1)   | -      | -      | 1(1) | -      | -   | 0%  | -   |            |
|                                                                            | - | - | F |        | -    | -   | 63  | -      | -      | 1(1)   | -      | -    | 1(1)   | -   | -   | 0%  |            |
|                                                                            | - | - | G |        | -    | -   | 77  | -      | -      | 2(2)   | -      | -    | 2(2)   | -   | -   | 1%  |            |
| Eukaryotic translation initiation factor 3 subunit L                       | C | C | C | 65995  | 145  | 117 | 165 | 5(5)   | 5(5)   | 5(5)   | 5(5)   | 5(5) | 5(5)   | 9%  | 7%  | 9%  | KRY53932.1 |
| Eukaryotic translation initiation factor 4 gamma 1                         | - | - | E | 156176 | -    | -   | 114 | -      | -      | 1(1)   | -      | -    | 1(1)   | -   | -   | 1%  | KRY55755.1 |



|                                                         |   |   |   |        |      |     |     |        |        |        |        |        |        |     |     |     |            |
|---------------------------------------------------------|---|---|---|--------|------|-----|-----|--------|--------|--------|--------|--------|--------|-----|-----|-----|------------|
| Eukaryotic translation initiation factor 5B, partial    | D | - | - | 129310 | 79   | -   | -   | 1(1)   | -      | -      | 1(1)   | -      | -      | 0%  | -   | -   | KRY59270.1 |
| Exportin-2                                              | D | D | D | 123252 | 92   | 95  | 92  | 1(1)   | 1(1)   | 1(1)   | 1(1)   | 1(1)   | 1(1)   | 1%  | 1%  | 1%  | KRY48592.1 |
|                                                         | - | - | G |        | -    | -   | 88  | -      | -      | 1(1)   | -      | -      | 1(1)   | -   | -   | 1%  |            |
| Extended synaptotagmin-2, partial                       | - | - | C | 205677 | -    | -   | 133 | -      | -      | 2(2)   | -      | -      | 2(2)   | -   | -   | 1%  | KRY50391.1 |
| Far upstream element-binding protein 2                  | A | - | A | 75769  | 85   | -   | 85  | 1(1)   | -      | 2(2)   | 1(1)   | -      | 2(2)   | 1%  | -   | 3%  | KRY57083.1 |
|                                                         | B | B | B |        | 102  | 69  | 190 | 2(1)   | 2(1)   | 5(5)   | 2(1)   | 2(1)   | 4(4)   | 3%  | 3%  | 6%  |            |
|                                                         | C | C | - |        | 246  | 238 | -   | 7(7)   | 12(10) | -      | 7(7)   | 11(10) | -      | 9%  | 15% | -   |            |
| Filamin-A, partial                                      | - | A | - | 259917 | -    | 66  | -   | -      | 1(1)   | -      | -      | 1(1)   | -      | -   | 0%  | -   | KRY59624.1 |
|                                                         | - | C | C |        | -    | 121 | 126 | -      | 2(2)   | 2(2)   | -      | 2(2)   | 2(2)   | -   | 1%  | 1%  |            |
|                                                         | D | D | D |        | 505  | 154 | 89  | 12(12) | 3(3)   | 1(1)   | 12(12) | 3(3)   | 1(1)   | 8%  | 1%  | 0%  |            |
|                                                         | - | - | E |        | -    | -   | 114 | -      | -      | 2(2)   | -      | -      | 2(2)   | -   | -   | 1%  |            |
|                                                         | - | - | F |        | -    | -   | 63  | -      | -      | 1(1)   | -      | -      | 1(1)   | -   | -   | 0%  |            |
|                                                         | - | - | G |        | -    | -   | 158 | -      | -      | 3(3)   | -      | -      | 3(3)   | -   | -   | 1%  |            |
| Fragile X mental retardation protein 1 -like protein B  | C | C | - | 64707  | 117  | 85  | -   | 2(2)   | 1(1)   | -      | 2(2)   | 1(1)   | -      | 4%  | 1%  | -   | KRY58060.1 |
| Fragile X mental retardation syndrome-related protein 1 | - | - | A | 48548  | -    | -   | 64  | -      | -      | 1(1)   | -      | -      | 1(1)   | -   | -   | 2%  | KRY58061.1 |
| Fructose-bisphosphate aldolase 1, partial               | A | A | A | 44597  | 1124 | 753 | 870 | 22(22) | 13(13) | 16(16) | 14(14) | 9(9)   | 11(11) | 50% | 36% | 44% | KRY52953.1 |
|                                                         | B | B | B |        | 109  | 357 | 315 | 2(2)   | 8(8)   | 6(5)   | 2(2)   | 7(7)   | 5(4)   | 8%  | 28% | 22% |            |
|                                                         | C | C | C |        | 212  | 259 | 187 | 3(3)   | 5(5)   | 3(3)   | 3(3)   | 4(4)   | 3(3)   | 16% | 12% | 9%  |            |
|                                                         | D | D | D |        | 156  | 197 | 173 | 2(2)   | 4(4)   | 3(2)   | 2(2)   | 4(4)   | 3(2)   | 10% | 11% | 10% |            |
|                                                         | - | - | E |        | -    | -   | 143 | -      | -      | 3(3)   | -      | -      | 3(3)   | -   | -   | 9%  |            |
|                                                         | - | - | F |        | -    | -   | 94  | -      | -      | 1(1)   | -      | -      | 1(1)   | -   | -   | 3%  |            |
|                                                         | - | - | G |        | -    | -   | 162 | -      | -      | 2(2)   | -      | -      | 2(2)   | -   | -   | 6%  |            |
| GDP-fucose protein O-fucosyltransferase 1               | A | A | - | 55623  | 112  | 83  | -   | 2(2)   | 1(1)   | -      | 2(2)   | 1(1)   | -      | 6%  | 2%  | -   | KRY61128.1 |
| Gelsolin, cytoplasmic, partial                          | D | - | - | 62573  | 96   | -   | -   | 1(1)   | -      | -      | 1(1)   | -      | -      | 2%  | -   | -   | KRY58897.1 |
| General vesicular transport factor, partial             | - | D | - | 118001 | -    | 62  | -   | -      | 1(1)   | -      | -      | 1(1)   | -      | -   | 1%  | -   | KRY58955.1 |
| Gephyrin                                                | - | C | C | 70317  | -    | 99  | 77  | -      | 2(2)   | 1(1)   | -      | 2(2)   | 1(1)   | -   | 3%  | 1%  | KRY53926.1 |
| Glioma pathogenesis-related protein 1                   | A | A | A | 54399  | 67   | 80  | 148 | 1(1)   | 1(1)   | 1(1)   | 1(1)   | 1(1)   | 1(1)   | 3%  | 3%  | 3%  | KRY45995.1 |
|                                                         | - | B | B |        | -    | 81  | 64  | -      | 1(1)   | 1(1)   | -      | 1(1)   | 1(1)   | -   | 3%  | 3%  |            |
|                                                         | - | C | C |        | -    | 92  | 76  | -      | 2(2)   | 1(1)   | -      | 2(2)   | 1(1)   | -   | 3%  | 3%  |            |
|                                                         | D | D | - |        | 58   | 101 | -   | 1(1)   | 1(1)   | -      | 1(1)   | 1(1)   | -      | 1%  | 3%  | -   |            |
| Glucose-6-phosphate 1-dehydrogenase                     | C | C | C | 61532  | 101  | 109 | 97  | 3(3)   | 2(2)   | 2(2)   | 3(3)   | 2(2)   | 2(2)   | 6%  | 4%  | 4%  | KRY54351.1 |
| Glucose-6-phosphate isomerase                           | B | B | B | 65882  | 108  | 167 | 223 | 2(2)   | 3(3)   | 4(4)   | 2(2)   | 3(3)   | 4(4)   | 4%  | 7%  | 10% | KRY50483.1 |
|                                                         | C | C | C |        | 253  | 244 | 160 | 6(5)   | 6(6)   | 2(2)   | 6(5)   | 6(6)   | 2(2)   | 12% | 13% | 5%  |            |
|                                                         | D | D | - |        | 88   | 66  | -   | 1(1)   | 1(1)   | -      | 1(1)   | 1(1)   | -      | 2%  | 2%  | -   |            |
| Glucosidase 2 subunit beta                              | C | C | - | 59343  | 76   | 68  | -   | 1(1)   | 1(1)   | -      | 1(1)   | 1(1)   | -      | 2%  | 2%  | -   | KRY56172.1 |
| Glucosylceramidase                                      | C | C | C | 61978  | 188  | 143 | 125 | 5(5)   | 3(3)   | 3(3)   | 5(5)   | 3(3)   | 3(3)   | 10% | 5%  | 6%  | KRY50060.1 |
| Glutamate dehydrogenase 2, mitochondrial                | A | - | A | 56781  | 123  | -   | 102 | 2(2)   | -      | 3(3)   | 2(2)   | -      | 3(3)   | 5%  | -   | 6%  | KRY47480.1 |
|                                                         | - | - | G |        | -    | -   | 76  | -      | -      | 1(1)   | -      | -      | 1(1)   | -   | -   | 2%  |            |
|                                                         | - | - | F | 60132  | -    | -   | 78  | -      | -      | 1(1)   | -      | -      | 1(1)   | -   | -   | 2%  | KRY47481.1 |
| Glutamate dehydrogenase, mitochondrial, partial         | - | - | D | 57060  | -    | -   | 86  | -      | -      | 1(1)   | -      | -      | 1(1)   | -   | -   | 3%  | KRY47482.1 |
|                                                         | - | - | F |        | -    | -   | 78  | -      | -      | 1(1)   | -      | -      | 1(1)   | -   | -   | 2%  |            |
| glutathione-S-transferase                               | - | A | A | 24198  | -    | 64  | 64  | -      | 1(0)   | 1(1)   | -      | 1(0)   | 1(1)   | -   | 5%  | 5%  | ABA42916.1 |
|                                                         | - | - | B |        | -    | -   | 65  | -      | -      | 1(1)   | -      | -      | 1(1)   | -   | -   | 5%  |            |
|                                                         | C | C | C |        | 70   | 72  | 63  | 1(1)   | 2(1)   | 1(1)   | 1(1)   | 2(1)   | 1(1)   | 5%  | 9%  | 5%  |            |
|                                                         | - | D | - |        | -    | 64  | -   | -      | 1(1)   | -      | -      | 1(1)   | -      | -   | 5%  | -   |            |
|                                                         | - | - | E |        | -    | -   | 69  | -      | -      | 1(1)   | -      | -      | 1(1)   | -   | -   | 5%  |            |
|                                                         | - | - | G |        | -    | -   | 71  | -      | -      | 1(1)   | -      | -      | 1(1)   | -   | -   | 5%  |            |
| Glyceraldehyde-3-phosphate dehydrogenase 1              | A | A | A | 37666  | 125  | 210 | 167 | 5(4)   | 7(7)   | 5(5)   | 5(4)   | 7(7)   | 5(5)   | 17% | 25% | 19% | KRY59635.1 |
|                                                         | B | B | B |        | 86   | 233 | 289 | 2(2)   | 6(5)   | 7(7)   | 2(2)   | 6(5)   | 7(7)   | 7%  | 21% | 26% |            |

|                                                          |   |   |   |        |      |      |      |        |        |        |        |        |        |     |     |     |            |
|----------------------------------------------------------|---|---|---|--------|------|------|------|--------|--------|--------|--------|--------|--------|-----|-----|-----|------------|
|                                                          | C | C | C |        | 387  | 271  | 281  | 9(9)   | 8(8)   | 6(6)   | 8(8)   | 8(8)   | 6(6)   | 33% | 30% | 24% |            |
|                                                          | D | D | D |        | 479  | 374  | 149  | 12(12) | 10(10) | 3(3)   | 10(10) | 8(8)   | 3(3)   | 40% | 30% | 12% |            |
|                                                          | - | - | E |        | -    | -    | 206  | -      | -      | 5(4)   | -      | -      | 5(4)   | -   | -   | 19% |            |
|                                                          | - | - | F |        | -    | -    | 82   | -      | -      | 1(1)   | -      | -      | 1(1)   | -   | -   | 2%  |            |
|                                                          | - | - | G |        | -    | -    | 155  | -      | -      | 3(3)   | -      | -      | 3(3)   | -   | -   | 8%  |            |
| Glycogen debranching enzyme, partial                     | - | C | C | 200494 | -    | 95   | 72   | -      | 1(1)   | 1(1)   | -      | 1(1)   | 1(1)   | -   | 0%  | 0%  | KRY52323.1 |
|                                                          | D | D | - |        | 390  | 150  | -    | 10(10) | 4(4)   | -      | 10(10) | 4(4)   | -      | 7%  | 2%  | -   |            |
|                                                          | - | - | E |        | -    | -    | 530  | -      | -      | 12(11) | -      | -      | 11(10) | -   | -   | 7%  |            |
|                                                          | - | - | F |        | -    | -    | 568  | -      | -      | 17(17) | -      | -      | 16(16) | -   | -   | 11% |            |
|                                                          | - | - | G |        | -    | -    | 275  | -      | -      | 9(8)   | -      | -      | 9(8)   | -   | -   | 6%  |            |
| Glycogen phosphorylase, partial                          | A | A | - | 175168 | 107  | 132  | -    | 2(2)   | 3(3)   | -      | 2(2)   | 3(3)   | -      | 1%  | 2%  | -   | KRY47089.1 |
|                                                          | - | B | B |        | -    | 117  | 84   | -      | 2(2)   | 3(3)   | -      | 2(2)   | 3(3)   | -   | 2%  | 2%  |            |
|                                                          | - | C | C |        | -    | 231  | 282  | -      | 8(8)   | 10(9)  | -      | 8(8)   | 9(8)   | -   | 6%  | 7%  |            |
|                                                          | D | D | D |        | 2144 | 1604 | 912  | 57(57) | 45(45) | 28(27) | 30(30) | 26(26) | 22(22) | 23% | 20% | 19% |            |
|                                                          | - | - | E |        | -    | -    | 675  | -      | -      | 18(18) | -      | -      | 15(15) | -   | -   | 12% |            |
| Glycogenin-1                                             | A | A | A | 41089  | 158  | 118  | 133  | 4(4)   | 3(3)   | 3(3)   | 3(3)   | 2(2)   | 3(3)   | 10% | 6%  | 10% | KRY61196.1 |
|                                                          | B | B | B |        | 80   | 98   | 67   | 1(1)   | 3(3)   | 1(1)   | 1(1)   | 3(3)   | 1(1)   | 3%  | 10% | 3%  |            |
| Glycylpeptide N-tetradecanoyltransferase 2, partial      | - | B | B | 125590 | -    | 83   | 104  | -      | 1(1)   | 2(2)   | -      | 1(1)   | 2(2)   | -   | 1%  | 2%  | KRY51777.1 |
| GMP synthase [glutamine-hydrolyzing], partial            | C | - | - | 79440  | 60   | -    | -    | 1(1)   | -      | -      | 1(1)   | -      | -      | 1%  | -   | -   | KRY52958.1 |
|                                                          | - | - | G |        | -    | -    | 69   | -      | -      | 1(1)   | -      | -      | 1(1)   | -   | -   | 1%  |            |
| Golgi apparatus protein 1 -like protein, partial         | D | D | - | 136466 | 95   | 64   | -    | 1(1)   | 1(1)   | -      | 1(1)   | 1(1)   | -      | 0%  | 0%  | -   | KRY52646.1 |
|                                                          | - | - | E |        | -    | -    | 475  | -      | -      | 12(12) | -      | -      | 12(12) | -   | -   | 13% |            |
| Guanine nucleotide-binding protein subunit beta-2-like 1 | - | C | C | 39904  | -    | 155  | 96   | -      | 3(3)   | 1(1)   | -      | 3(3)   | 1(1)   | -   | 10% | 4%  | KRY55875.1 |
|                                                          | D | - | D |        | 84   | -    | 86   | 1(1)   | -      | 1(1)   | 1(1)   | -      | 1(1)   | 4%  | -   | 3%  |            |
|                                                          | - | - | E |        | -    | -    | 79   | -      | -      | 1(1)   | -      | -      | 1(1)   | -   | -   | 3%  |            |
|                                                          | - | - | F |        | -    | -    | 72   | -      | -      | 1(1)   | -      | -      | 1(1)   | -   | -   | 3%  |            |
|                                                          | - | - | G |        | -    | -    | 84   | -      | -      | 1(1)   | -      | -      | 1(1)   | -   | -   | 3%  |            |
| H/ACA ribonucleoprotein complex subunit 4                | - | B | - | 51067  | -    | 68   | -    | -      | 1(1)   | -      | -      | 1(1)   | -      | -   | 1%  | -   | KRY53301.1 |
| Heat shock 70 kDa protein 13                             | C | - | - | 50433  | 67   | -    | -    | 1(1)   | -      | -      | 1(1)   | -      | -      | 2%  | -   | -   | KRY49991.1 |
| Heat shock 70 kDa protein 4L                             | - | - | B | 101361 | -    | -    | 91   | -      | -      | 1(1)   | -      | -      | 1(1)   | -   | -   | 1%  | KRY51771.1 |
|                                                          | - | - | E |        | -    | -    | 115  | -      | -      | 5(5)   | -      | -      | 5(5)   | -   | -   | 7%  |            |
|                                                          | - | - | G |        | -    | -    | 72   | -      | -      | 1(1)   | -      | -      | 1(1)   | -   | -   | 1%  |            |
| Heat shock cognate 71 kDa protein, partial               | A | A | A | 131529 | 633  | 636  | 569  | 19(18) | 21(19) | 18(18) | 17(16) | 16(14) | 16(16) | 17% | 17% | 16% | KRY58599.1 |
|                                                          | B | B | B |        | 175  | 308  | 165  | 3(3)   | 7(7)   | 6(6)   | 3(3)   | 7(7)   | 6(6)   | 2%  | 7%  | 5%  |            |
|                                                          | C | C | C |        | 1183 | 1014 | 1036 | 40(38) | 36(34) | 33(32) | 28(27) | 24(22) | 24(23) | 25% | 21% | 24% |            |
|                                                          | D | D | D |        | 727  | 505  | 218  | 20(20) | 14(14) | 8(8)   | 18(18) | 13(13) | 8(8)   | 17% | 13% | 8%  |            |
|                                                          | - | - | E |        | -    | -    | 421  | -      | -      | 11(11) | -      | -      | 10(10) | -   | -   | 10% |            |
|                                                          | - | - | F |        | -    | -    | 437  | -      | -      | 12(12) | -      | -      | 11(11) | -   | -   | 11% |            |
|                                                          | - | - | G |        | -    | -    | 380  | -      | -      | 10(10) | -      | -      | 9(9)   | -   | -   | 9%  |            |
| heat shock protein 70                                    | B | B | - | 71860  | 175  | 308  | -    | 3(3)   | 7(7)   | -      | 3(3)   | 7(7)   | -      | 5%  | 13% | -   | CAA73574.1 |
| Heat shock protein 83, partial                           | A | A | A | 91707  | 207  | 193  | 225  | 5(5)   | 7(7)   | 8(8)   | 5(5)   | 7(7)   | 8(8)   | 6%  | 10% | 10% | KRY48983.1 |
|                                                          | B | B | B |        | 362  | 369  | 441  | 12(12) | 15(14) | 18(17) | 11(11) | 13(13) | 12(12) | 15% | 19% | 15% |            |
|                                                          | C | C | C |        | 562  | 446  | 429  | 19(19) | 12(12) | 17(15) | 19(19) | 11(11) | 15(13) | 24% | 16% | 19% |            |
|                                                          | D | D | D |        | 551  | 594  | 345  | 13(13) | 17(17) | 9(9)   | 11(11) | 15(15) | 9(9)   | 16% | 22% | 13% |            |
|                                                          | - | - | E |        | -    | -    | 456  | -      | -      | 13(13) | -      | -      | 12(12) | -   | -   | 17% |            |
|                                                          | - | - | F |        | -    | -    | 320  | -      | -      | 10(9)  | -      | -      | 10(9)  | -   | -   | 14% |            |
|                                                          | - | - | G |        | -    | -    | 424  | -      | -      | 15(15) | -      | -      | 14(14) | -   | -   | 20% |            |
| Hexokinase                                               | A | - | A | 56783  | 241  | -    | 140  | 3(3)   | -      | 3(3)   | 2(2)   | -      | 2(2)   | 6%  | -   | 7%  | KRY57386.1 |
|                                                          | B | B | B |        | 262  | 464  | 540  | 8(8)   | 12(11) | 14(14) | 7(7)   | 9(8)   | 12(12) | 16% | 28% | 34% |            |

|                                                   |   |   |   |        |      |     |     |        |        |        |        |        |        |     |     |     |            |
|---------------------------------------------------|---|---|---|--------|------|-----|-----|--------|--------|--------|--------|--------|--------|-----|-----|-----|------------|
|                                                   | C | C | - |        | 92   | 86  | -   | 1(1)   | 1(1)   | -      | 1(1)   | 1(1)   | -      | 3%  | 2%  | -   |            |
|                                                   | - | D | - |        | -    | 59  | -   | -      | 1(1)   | -      | -      | 1(1)   | -      | -   | 1%  | -   |            |
| Hexokinase type 2, partial                        | B | B | B | 52657  | 98   | 75  | 139 | 1(1)   | 1(1)   | 4(3)   | 1(1)   | 1(1)   | 3(3)   | 2%  | 3%  | 9%  | KRY53884.1 |
| Histone-arginine methyltransferase CARM1          | C | - | - | 69282  | 71   | -   | -   | 1(1)   | -      | -      | 1(1)   | -      | -      | 1%  | -   | -   | KRY59724.1 |
| Histone-binding protein RBBP7                     | - | B | B | 48666  | -    | 60  | 78  | -      | 1(1)   | 1(1)   | -      | 1(1)   | 1(1)   | -   | 3%  | 3%  | KRY54520.1 |
| Histone-lysine N-methyltransferase EHMT2, partial | A | A | A | 40953  | 161  | 142 | 158 | 3(3)   | 2(2)   | 3(3)   | 3(3)   | 2(2)   | 3(3)   | 15% | 7%  | 11% | KRY52481.1 |
| Hsp90 co-chaperone Cdc37                          | A | A | - | 42726  | 85   | 81  | -   | 1(1)   | 1(1)   | -      | 1(1)   | 1(1)   | -      | 4%  | 2%  | -   | KRY60145.1 |
|                                                   | B | - | - |        | 70   | -   | -   | 1(1)   | -      | -      | 1(1)   | -      | -      | 2%  | -   | -   |            |
| hypothetical protein T03_10292                    | - | - | E | 70667  | -    | -   | 64  | -      | -      | 1(1)   | -      | -      | 1(1)   | -   | -   | 1%  | KRY52704.1 |
| hypothetical protein T03_11006                    | B | - | B | 163737 | 136  | -   | 146 | 3(3)   | -      | 5(5)   | 3(3)   | -      | 5(5)   | 2%  | -   | 3%  | KRY56142.1 |
|                                                   | - | - | C |        | -    | -   | 80  | -      | -      | 1(1)   | -      | -      | 1(1)   | -   | -   | 0%  |            |
| hypothetical protein T03_13827                    | A | A | A | 13483  | 84   | 86  | 109 | 1(1)   | 1(1)   | 2(2)   | 1(1)   | 1(1)   | 2(2)   | 9%  | 10% | 19% | KRY56487.1 |
|                                                   | B | B | B |        | 71   | 79  | 82  | 1(1)   | 1(1)   | 1(1)   | 1(1)   | 1(1)   | 1(1)   | 10% | 10% | 10% |            |
|                                                   | - | C | - |        | -    | 116 | -   | -      | 2(2)   | -      | -      | 2(2)   | -      | -   | 19% | -   |            |
|                                                   | - | - | F |        | -    | -   | 78  | -      | -      | 1(1)   | -      | -      | 1(1)   | -   | -   | 10% |            |
| hypothetical protein T03_14678                    | A | - | - | 55770  | 88   | -   | -   | 1(1)   | -      | -      | 1(1)   | -      | -      | 2%  | -   | -   | KRY57784.1 |
|                                                   | B | B | B |        | 71   | 116 | 133 | 1(1)   | 2(2)   | 2(2)   | 1(1)   | 2(2)   | 2(2)   | 1%  | 4%  | 4%  |            |
|                                                   | - | - | C |        | -    | -   | 735 | -      | -      | 20(20) | -      | -      | 13(13) | -   | -   | 27% |            |
|                                                   | - | D | D |        | -    | 74  | 94  | -      | 1(1)   | 2(2)   | -      | 1(1)   | 2(2)   | -   | 3%  | 4%  |            |
|                                                   | - | - | E |        | -    | -   | 147 | -      | -      | 3(3)   | -      | -      | 3(3)   | -   | -   | 9%  |            |
|                                                   | - | - | F |        | -    | -   | 65  | -      | -      | 1(1)   | -      | -      | 1(1)   | -   | -   | 3%  |            |
|                                                   | - | - | G |        | -    | -   | 82  | -      | -      | 1(1)   | -      | -      | 1(1)   | -   | -   | 1%  |            |
| hypothetical protein T03_14974, partial           | - | - | B | 43617  | -    | -   | 78  | -      | -      | 1(1)   | -      | -      | 1(1)   | -   | -   | 3%  | KRY46929.1 |
|                                                   | C | C | - |        | 95   | 76  | -   | 2(2)   | 1(1)   | -      | 2(2)   | 1(1)   | -      | 6%  | 3%  | -   |            |
|                                                   | D | D | - |        | 98   | 61  | -   | 1(1)   | 1(1)   | -      | 1(1)   | 1(1)   | -      | 3%  | 3%  | -   |            |
| hypothetical protein T03_16806, partial           | A | - | - | 30897  | 56   | -   | -   | 1(1)   | -      | -      | 1(1)   | -      | -      | 5%  | -   | -   | KRY50505.1 |
| hypothetical protein T03_17187                    | A | A | A | 46783  | 1259 | 671 | 814 | 24(23) | 14(14) | 15(15) | 18(17) | 11(11) | 11(11) | 56% | 39% | 43% | KRY50178.1 |
|                                                   | B | B | B |        | 832  | 879 | 895 | 14(14) | 17(17) | 19(18) | 9(9)   | 12(12) | 14(13) | 35% | 45% | 49% |            |
|                                                   | C | C | C |        | 288  | 246 | 197 | 6(6)   | 5(5)   | 3(3)   | 6(6)   | 4(4)   | 2(2)   | 23% | 11% | 9%  |            |
| hypothetical protein T03_17805, partial           | - | C | - | 18630  | -    | 63  | -   | -      | 1(1)   | -      | -      | 1(1)   | -      | -   | 6%  | -   | KRY53056.1 |
| hypothetical protein T03_3884                     | - | D | - | 26017  | -    | 59  | -   | -      | 1(1)   | -      | -      | 1(1)   | -      | -   | 3%  | -   | KRY58587.1 |
|                                                   | - | - | F |        | -    | -   | 64  | -      | -      | 1(1)   | -      | -      | 1(1)   | -   | -   | 3%  |            |
| hypothetical protein T03_3917, partial            | C | - | C | 46109  | 86   | -   | 69  | 1(1)   | -      | 1(1)   | 1(1)   | -      | 1(1)   | 3%  | -   | 3%  | KRY54907.1 |
| hypothetical protein T03_4197                     | - | B | B | 88736  | -    | 74  | 79  | -      | 1(1)   | 1(1)   | -      | 1(1)   | 1(1)   | -   | 1%  | 1%  | KRY53644.1 |
|                                                   | D | D | D |        | 1077 | 521 | 159 | 28(27) | 17(17) | 6(6)   | 23(22) | 16(16) | 6(6)   | 33% | 25% | 9%  |            |
|                                                   | - | - | E |        | -    | -   | 95  | -      | -      | 1(1)   | -      | -      | 1(1)   | -   | -   | 4%  |            |
| hypothetical protein T03_4258, partial            | - | - | D | 32222  | -    | -   | 70  | -      | -      | 1(1)   | -      | -      | 1(1)   | -   | -   | 4%  | KRY53223.1 |
|                                                   | - | - | E |        | -    | -   | 67  | -      | -      | 1(1)   | -      | -      | 1(1)   | -   | -   | 4%  |            |
| hypothetical protein T03_539                      | A | A | A | 55965  | 1134 | 756 | 785 | 26(26) | 20(20) | 19(19) | 16(16) | 11(11) | 12(12) | 30% | 19% | 19% | KRY55455.1 |
|                                                   | B | B | B |        | 227  | 364 | 242 | 5(5)   | 9(9)   | 5(4)   | 4(4)   | 8(8)   | 4(3)   | 8%  | 15% | 9%  |            |
|                                                   | - | D | - |        | -    | 73  | -   | -      | 1(1)   | -      | -      | 1(1)   | -      | -   | 2%  | -   |            |
| hypothetical protein T03_7457                     | C | - | C | 49230  | 111  | -   | 94  | 1(1)   | -      | 1(1)   | 1(1)   | -      | 1(1)   | 3%  | -   | 3%  | KRY48668.1 |
| hypothetical protein T03_7459                     | - | B | - | 13934  | -    | 120 | -   | -      | 1(1)   | -      | -      | 1(1)   | -      | -   | 13% | -   | KRY60639.1 |
|                                                   | - | C | C |        | -    | 124 | 124 | -      | 1(1)   | 1(1)   | -      | 1(1)   | 1(1)   | -   | 13% | 13% |            |
|                                                   | D | D | - |        | 124  | 117 | -   | 1(1)   | 1(1)   | -      | 1(1)   | 1(1)   | -      | 13% | 13% | -   |            |
|                                                   | - | - | E |        | -    | -   | 93  | -      | -      | 1(1)   | -      | -      | 1(1)   | -   | -   | 13% |            |
|                                                   | - | - | F |        | -    | -   | 103 | -      | -      | 1(1)   | -      | -      | 1(1)   | -   | -   | 13% |            |
|                                                   | - | - | G |        | -    | -   | 90  | -      | -      | 1(1)   | -      | -      | 1(1)   | -   | -   | 13% |            |
| hypothetical protein T03_7883                     | D | D | D | 117012 | 195  | 210 | 102 | 4(4)   | 3(3)   | 1(1)   | 4(4)   | 2(2)   | 1(1)   | 4%  | 2%  | 0%  | KRY46989.1 |

|                                                                     |   |   |   |        |     |     |     |        |        |        |        |        |        |     |     |     |            |
|---------------------------------------------------------------------|---|---|---|--------|-----|-----|-----|--------|--------|--------|--------|--------|--------|-----|-----|-----|------------|
|                                                                     | - | - | E |        | -   | -   | 220 | -      | -      | 5(5)   | -      | -      | 4(4)   | -   | -   | 4%  |            |
|                                                                     | - | - | F |        | -   | -   | 99  | -      | -      | 3(2)   | -      | -      | 3(2)   | -   | -   | 2%  |            |
| hypothetical protein T03_7939                                       | A | A | A | 64129  | 68  | 137 | 79  | 1(1)   | 2(2)   | 1(1)   | 1(1)   | 2(2)   | 1(1)   | 1%  | 4%  | 1%  | KRY48964.1 |
|                                                                     | - | - | B |        | -   | -   | 70  | -      | -      | 1(1)   | -      | -      | 1(1)   | -   | -   | 1%  |            |
|                                                                     | C | - | - |        | 98  | -   | -   | 2(2)   | -      | -      | 2(2)   | -      | -      | 4%  | -   | -   |            |
|                                                                     | - | D | - |        | -   | 61  | -   | -      | 1(1)   | -      | -      | 1(1)   | -      | -   | 1%  | -   |            |
| hypothetical protein T03_8666                                       | A | A | A | 55679  | 82  | 67  | 102 | 1(1)   | 2(2)   | 3(3)   | 1(1)   | 2(2)   | 3(3)   | 2%  | 7%  | 14% | KRY58914.1 |
|                                                                     | B | B | - |        | 130 | 228 | -   | 3(3)   | 7(7)   | -      | 3(3)   | 7(7)   | -      | 7%  | 9%  | -   |            |
|                                                                     | C | - | - |        | 107 | -   | -   | 4(4)   | -      | -      | 4(4)   | -      | -      | 7%  | -   | -   |            |
| hypothetical protein T03_8694                                       | A | A | A | 40952  | 144 | 188 | 155 | 5(5)   | 8(7)   | 7(6)   | 5(5)   | 8(7)   | 6(5)   | 14% | 22% | 17% | KRY46541.1 |
|                                                                     | B | B | B |        | 63  | 78  | 90  | 1(1)   | 1(1)   | 3(3)   | 1(1)   | 1(1)   | 3(3)   | 3%  | 3%  | 9%  |            |
|                                                                     | - | - | C |        | -   | -   | 83  | -      | -      | 1(1)   | -      | -      | 1(1)   | -   | -   | 3%  |            |
|                                                                     | D | D | - |        | 78  | 68  | -   | 2(2)   | 2(1)   | -      | 2(2)   | 2(1)   | -      | 5%  | 6%  | -   |            |
| hypothetical protein T03_9489                                       | C | C | C | 19940  | 72  | 68  | 65  | 1(1)   | 1(1)   | 1(1)   | 1(1)   | 1(1)   | 1(1)   | 5%  | 5%  | 5%  | KRY46491.1 |
|                                                                     | D | D | - |        | 65  | 68  | -   | 1(1)   | 1(1)   | -      | 1(1)   | 1(1)   | -      | 5%  | 5%  | -   |            |
|                                                                     | - | - | E |        | -   | -   | 71  | -      | -      | 1(1)   | -      | -      | 1(1)   | -   | -   | 5%  |            |
| hypothetical protein T03_9928                                       | C | - | C | 82569  | 86  | -   | 69  | 1(1)   | -      | 1(1)   | 1(1)   | -      | 1(1)   | 1%  | -   | 1%  | KRY47039.1 |
|                                                                     | - | - | E |        | -   | -   | 62  | -      | -      | 1(1)   | -      | -      | 1(1)   | -   | -   | 1%  |            |
| hypothetical protein T03_9976                                       | A | A | - | 69321  | 92  | 119 | -   | 2(2)   | 3(3)   | -      | 2(2)   | 3(3)   | -      | 3%  | 5%  | -   | KRY53902.1 |
|                                                                     | B | B | B |        | 79  | 109 | 89  | 1(1)   | 3(3)   | 1(1)   | 1(1)   | 3(3)   | 1(1)   | 2%  | 8%  | 1%  |            |
|                                                                     | - | - | F |        | -   | -   | 77  | -      | -      | 1(1)   | -      | -      | 1(1)   | -   | -   | 1%  |            |
| Hypoxia up-regulated protein 1, partial                             | D | - | - | 108762 | 188 | -   | -   | 3(3)   | -      | -      | 3(3)   | -      | -      | 4%  | -   | -   | KRY49848.1 |
|                                                                     | - | - | F |        | -   | -   | 206 | -      | -      | 5(5)   | -      | -      | 5(5)   | -   | -   | 6%  |            |
| Ig-like and fibronectin type-III domain-containing protein C25G4.10 | C | C | - | 179761 | 191 | 107 | -   | 3(2)   | 2(2)   | -      | 3(2)   | 2(2)   | -      | 2%  | 1%  | -   | KRY58616.1 |
|                                                                     | - | - | E |        | -   | -   | 62  | -      | -      | 1(1)   | -      | -      | 1(1)   | -   | -   | 0%  |            |
|                                                                     | - | - | F |        | -   | -   | 62  | -      | -      | 1(1)   | -      | -      | 1(1)   | -   | -   | 0%  |            |
| Importin subunit beta-1, partial                                    | D | D | - | 101582 | 203 | 103 | -   | 3(3)   | 1(1)   | -      | 3(3)   | 1(1)   | -      | 5%  | 1%  | -   | KRY56880.1 |
|                                                                     | - | - | E |        | -   | -   | 68  | -      | -      | 1(1)   | -      | -      | 1(1)   | -   | -   | 0%  |            |
| Importin-7                                                          | - | - | E | 158791 | -   | -   | 73  | -      | -      | 1(1)   | -      | -      | 1(1)   | -   | -   | 0%  | KRY59671.1 |
| Importin-8                                                          | - | - | E | 157915 | -   | -   | 73  | -      | -      | 1(1)   | -      | -      | 1(1)   | -   | -   | 0%  | KRY59672.1 |
| Innexin unc-9                                                       | - | D | - | 48936  | -   | 66  | -   | -      | 1(1)   | -      | -      | 1(1)   | -      | -   | 2%  | -   | KRY59455.1 |
| Innexin-12                                                          | B | B | B | 55187  | 84  | 92  | 105 | 3(3)   | 3(2)   | 4(3)   | 3(3)   | 3(2)   | 4(3)   | 6%  | 6%  | 9%  | KRY59456.1 |
| Inositol monophosphatase ttx-7, partial                             | - | - | B | 32017  | -   | -   | 62  | -      | -      | 1(1)   | -      | -      | 1(1)   | -   | -   | 4%  | KRY54643.1 |
|                                                                     | - | C | - |        | -   | 101 | -   | -      | 1(1)   | -      | -      | 1(1)   | -      | -   | 3%  | -   |            |
| Insulin-degrading enzyme                                            | C | - | - | 117599 | 66  | -   | -   | 1(1)   | -      | -      | 1(1)   | -      | -      | 0%  | -   | -   | KRY56124.1 |
|                                                                     | - | - | D |        | -   | -   | 132 | -      | -      | 3(3)   | -      | -      | 3(3)   | -   | -   | 3%  |            |
|                                                                     | - | - | E |        | -   | -   | 82  | -      | -      | 2(2)   | -      | -      | 2(2)   | -   | -   | 1%  |            |
| Integrin beta pat-3                                                 | - | - | E | 97116  | -   | -   | 109 | -      | -      | 2(2)   | -      | -      | 2(2)   | -   | -   | 2%  | KRY53462.1 |
| Intermediate filament protein B, partial                            | A | A | - | 71689  | 114 | 94  | -   | 3(3)   | 2(2)   | -      | 3(3)   | 2(2)   | -      | 4%  | 2%  | -   | KRY59373.1 |
|                                                                     | B | B | B |        | 165 | 199 | 192 | 7(7)   | 10(9)  | 12(10) | 7(7)   | 10(9)  | 11(10) | 10% | 15% | 14% |            |
|                                                                     | C | C | C |        | 827 | 670 | 983 | 37(35) | 29(29) | 42(42) | 26(26) | 21(21) | 27(27) | 33% | 33% | 37% |            |
|                                                                     | - | D | - |        | -   | 82  | -   | -      | 1(1)   | -      | -      | 1(1)   | -      | -   | 1%  | -   |            |
|                                                                     | - | - | G |        | -   | -   | 80  | -      | -      | 2(2)   | -      | -      | 2(2)   | -   | -   | 3%  |            |
| Intermediate filament protein ifa-1                                 | A | A | A | 73429  | 307 | 289 | 401 | 13(13) | 13(13) | 15(13) | 12(12) | 12(12) | 13(11) | 17% | 20% | 20% | KRY45949.1 |
|                                                                     | B | B | B |        | 397 | 436 | 536 | 18(18) | 17(17) | 23(23) | 17(17) | 15(15) | 20(20) | 23% | 20% | 30% |            |
|                                                                     | D | D | D |        | 281 | 229 | 95  | 7(6)   | 10(9)  | 2(2)   | 7(6)   | 10(9)  | 2(2)   | 14% | 17% | 2%  |            |
|                                                                     | - | - | E |        | -   | -   | 198 | -      | -      | 7(6)   | -      | -      | 6(5)   | -   | -   | 9%  |            |
|                                                                     | - | - | F |        | -   | -   | 125 | -      | -      | 6(6)   | -      | -      | 6(6)   | -   | -   | 8%  |            |
| Iron-sulfur cluster assembly enzyme ISCU, mitochondrial             | - | - | B | 202951 | -   | -   | 76  | -      | -      | 1(1)   | -      | -      | 1(1)   | -   | -   | 0%  | KRY49130.1 |

|                                                                             |   |   |   |        |     |     |     |       |      |      |      |      |      |     |     |     |            |
|-----------------------------------------------------------------------------|---|---|---|--------|-----|-----|-----|-------|------|------|------|------|------|-----|-----|-----|------------|
| Isochorismatase domain-containing protein 2, mitochondrial                  | - | C | C | 19834  | -   | 80  | 78  | -     | 1(1) | 1(1) | -    | 1(1) | 1(1) | -   | 8%  | 8%  | KRY61349.1 |
|                                                                             | - | - | E |        | -   | -   | 69  | -     | -    | 1(1) | -    | -    | 1(1) | -   | -   | 8%  |            |
| Isoleucine--tRNA ligase, cytoplasmic                                        | - | - | E | 143414 | -   | -   | 110 | -     | -    | 2(2) | -    | -    | 2(2) | -   | -   | 1%  | KRY51016.1 |
|                                                                             | - | - | F |        | -   | -   | 64  | -     | -    | 1(1) | -    | -    | 1(1) | -   | -   | 0%  |            |
|                                                                             | - | - | G |        | -   | -   | 78  | -     | -    | 1(1) | -    | -    | 1(1) | -   | -   | 0%  |            |
| Isopentenyl-diphosphate Delta-isomerase II, partial                         | - | B | - | 41386  | -   | 64  | -   | -     | 1(1) | -    | -    | 1(1) | -    | -   | 2%  | -   | KRY59814.1 |
|                                                                             | C | C | - |        | 79  | 67  | -   | 1(1)  | 1(1) | -    | 1(1) | 1(1) | -    | 2%  | 2%  | -   |            |
|                                                                             | D | - | - |        | 84  | -   | -   | 1(1)  | -    | -    | 1(1) | -    | -    | 2%  | -   | -   |            |
|                                                                             | - | - | E |        | -   | -   | 85  | -     | -    | 1(1) | -    | -    | 1(1) | -   | -   | 2%  |            |
|                                                                             | - | - | G |        | -   | -   | 75  | -     | -    | 1(1) | -    | -    | 1(1) | -   | -   | 2%  |            |
| J5 protein, partial                                                         | A | - | A | 41174  | 77  | -   | 94  | 1(1)  | -    | 1(1) | 1(1) | -    | 1(1) | 2%  | -   | 2%  | AAD42227.1 |
|                                                                             | - | - | B |        | -   | -   | 77  | -     | -    | 1(1) | -    | -    | 1(1) | -   | -   | 3%  |            |
| KDEL motif-containing protein 1                                             | - | - | C | 58465  | -   | -   | 86  | -     | -    | 1(1) | -    | -    | 1(1) | -   | -   | 2%  | KRY54258.1 |
| KDEL motif-containing protein 2                                             | C | - | C | 59198  | 57  | -   | 86  | 1(0)  | -    | 1(1) | 1(0) | -    | 1(1) | 1%  | -   | 2%  | KRY54257.1 |
| KH domain-containing, RNA-binding, signal transduction-associated protein 2 | - | - | B | 49642  | -   | -   | 112 | -     | -    | 3(2) | -    | -    | 3(2) | -   | -   | 7%  | KRY48053.1 |
| Kinesin heavy chain                                                         | - | - | C | 115384 | -   | -   | 89  | -     | -    | 1(1) | -    | -    | 1(1) | -   | -   | 1%  | KRY58465.1 |
|                                                                             | D | D | - |        | 96  | 78  | -   | 2(2)  | 1(1) | -    | 2(2) | 1(1) | -    | 2%  | 0%  | -   |            |
|                                                                             | - | - | G |        | -   | -   | 66  | -     | -    | 1(1) | -    | -    | 1(1) | -   | -   | 0%  |            |
| Kynurenine--oxoglutarate transaminase 3                                     | A | A | A | 60100  | 241 | 209 | 227 | 5(5)  | 7(6) | 4(4) | 4(4) | 7(6) | 4(4) | 11% | 16% | 12% | KRY54139.1 |
|                                                                             | - | B | - |        | -   | 61  | -   | -     | 1(1) | -    | -    | 1(1) | -    | -   | 2%  | -   |            |
| L-2-hydroxyglutarate dehydrogenase, mitochondrial                           | A | A | A | 47961  | 356 | 193 | 144 | 8(8)  | 4(4) | 3(3) | 7(7) | 4(4) | 3(3) | 23% | 15% | 9%  | KRY56323.1 |
| Laminin subunit alpha-2, partial                                            | - | - | E | 358743 | -   | -   | 64  | -     | -    | 1(1) | -    | -    | 1(1) | -   | -   | 0%  | KRY58196.1 |
| LETM1 and EF-hand domain-containing protein 1, mitochondrial                | A | A | - | 118848 | 92  | 69  | -   | 2(2)  | 1(1) | -    | 2(2) | 1(1) | -    | 2%  | 1%  | -   | KRY56766.1 |
|                                                                             | - | B | - |        | -   | 87  | -   | -     | 1(1) | -    | -    | 1(1) | -    | -   | 1%  | -   |            |
| Leucine-rich PPR motif-containing protein, mitochondrial                    | - | - | E | 154713 | -   | -   | 112 | -     | -    | 4(4) | -    | -    | 4(4) | -   | -   | 2%  | KRY57360.1 |
|                                                                             | - | - | G |        | -   | -   | 66  | -     | -    | 1(1) | -    | -    | 1(1) | -   | -   | 0%  |            |
| Leucine-rich repeat-containing protein 15                                   | B | - | - | 77180  | 62  | -   | -   | 1(1)  | -    | -    | 1(1) | -    | -    | 2%  | -   | -   | KRY61264.1 |
|                                                                             | C | - | - | 68831  | 63  | -   | -   | 1(1)  | -    | -    | 1(1) | -    | -    | 1%  | -   | -   |            |
|                                                                             | D | D | D |        | 284 | 85  | 68  | 10(8) | 5(4) | 1(0) | 9(8) | 5(4) | 1(0) | 18% | 8%  | 1%  |            |
|                                                                             | - | - | E |        | -   | -   | 65  | -     | -    | 1(1) | -    | -    | 1(1) | -   | -   | 1%  |            |
| Leucine-rich repeat-containing protein 4B, partial                          | D | D | - | 92627  | 197 | 139 | -   | 2(2)  | 2(2) | -    | 2(2) | 2(2) | -    | 3%  | 3%  | -   | KRY56692.1 |
| Leucine-rich repeat-containing protein let-4                                | B | - | - | 81991  | 62  | -   | -   | 1(1)  | -    | -    | 1(1) | -    | -    | 1%  | -   | -   | KRY61263.1 |
| Leucine--tRNA ligase, cytoplasmic                                           | D | - | - | 135420 | 99  | -   | -   | 1(1)  | -    | -    | 1(1) | -    | -    | 1%  | -   | -   | KRY54245.1 |
|                                                                             | - | - | E |        | -   | -   | 76  | -     | -    | 2(2) | -    | -    | 2(2) | -   | -   | 1%  |            |
| Leukocyte elastase inhibitor C, partial                                     | A | A | A | 43705  | 160 | 111 | 74  | 4(4)  | 3(3) | 1(1) | 4(4) | 3(3) | 1(1) | 13% | 9%  | 2%  | KRY55578.1 |
|                                                                             | B | B | B |        | 128 | 164 | 131 | 2(2)  | 5(5) | 6(4) | 2(2) | 4(4) | 5(4) | 6%  | 14% | 13% |            |
| LIM domain and actin-binding protein 1                                      | A | - | - | 108499 | 66  | -   | -   | 1(1)  | -    | -    | 1(1) | -    | -    | 1%  | -   | -   | KRY61178.1 |
| Lipase maturation factor 2                                                  | C | C | C | 77441  | 81  | 157 | 136 | 1(1)  | 3(3) | 2(2) | 1(1) | 3(3) | 1(1) | 2%  | 7%  | 1%  | KRY59894.1 |
|                                                                             | D | - | - |        | 111 | -   | -   | 1(1)  | -    | -    | 1(1) | -    | -    | 3%  | -   | -   |            |
|                                                                             | - | - | E |        | -   | -   | 72  | -     | -    | 1(1) | -    | -    | 1(1) | -   | -   | 1%  |            |
|                                                                             | - | - | G |        | -   | -   | 97  | -     | -    | 2(2) | -    | -    | 2(2) | -   | -   | 4%  |            |
| Lipopolysaccharide biosynthesis protein RfbH                                | - | - | B | 50863  | -   | -   | 64  | -     | -    | 1(1) | -    | -    | 1(1) | -   | -   | 1%  | KRY52541.1 |
| Lissencephaly-1 -like protein                                               | A | A | A | 62181  | 61  | 65  | 75  | 1(1)  | 1(1) | 1(1) | 1(1) | 1(1) | 1(1) | 1%  | 1%  | 2%  | KRY60128.1 |
| L-lactate dehydrogenase                                                     | - | C | - | 44144  | -   | 89  | -   | -     | 1(1) | -    | -    | 1(1) | -    | -   | 3%  | -   | KRY58174.1 |
| Lon protease -like protein, mitochondrial, partial                          | D | D | - | 107329 | 209 | 80  | -   | 7(7)  | 2(2) | -    | 7(7) | 2(2) | -    | 8%  | 1%  | -   | KRY50200.1 |
| Lupus La -like protein A, partial                                           | B | B | B | 120320 | 74  | 75  | 105 | 1(1)  | 2(2) | 1(1) | 1(1) | 2(2) | 1(1) | 1%  | 2%  | 1%  | KRY45724.1 |
|                                                                             | C | C | C |        | 269 | 204 | 262 | 5(5)  | 4(4) | 4(4) | 5(5) | 4(4) | 2(2) | 6%  | 5%  | 3%  |            |
| Lysine--tRNA ligase                                                         | - | C | C | 68729  | -   | 123 | 111 | -     | 2(2) | 3(3) | -    | 2(2) | 3(3) | -   | 4%  | 4%  | KRY55658.1 |

|                                                                      |   |   |   |        |     |     |     |      |        |        |      |       |        |     |     |     |            |
|----------------------------------------------------------------------|---|---|---|--------|-----|-----|-----|------|--------|--------|------|-------|--------|-----|-----|-----|------------|
| Lysosomal aspartic protease, partial                                 | A | A | A | 46676  | 261 | 215 | 179 | 3(3) | 3(3)   | 2(2)   | 3(3) | 3(3)  | 2(2)   | 10% | 13% | 6%  | KRY49432.1 |
|                                                                      | - | B | B |        | -   | 108 | 128 | -    | 1(1)   | 1(1)   | -    | 1(1)  | 1(1)   | -   | 6%  | 6%  |            |
| Malate dehydrogenase, cytoplasmic                                    | A | A | A | 36616  | 143 | 154 | 106 | 2(2) | 2(2)   | 1(1)   | 2(2) | 2(2)  | 1(1)   | 8%  | 8%  | 5%  | KRY57329.1 |
|                                                                      | B | B | - |        | 109 | 129 | -   | 2(2) | 2(2)   | -      | 2(2) | 2(2)  | -      | 6%  | 8%  | -   |            |
|                                                                      | C | C | C |        | 143 | 84  | 156 | 4(4) | 3(3)   | 3(3)   | 4(4) | 3(3)  | 3(3)   | 15% | 7%  | 10% |            |
|                                                                      | D | D | D |        | 97  | 192 | 115 | 3(2) | 5(5)   | 2(2)   | 3(2) | 5(5)  | 2(2)   | 6%  | 15% | 8%  |            |
|                                                                      | - | - | E |        | -   | -   | 183 | -    | -      | 5(5)   | -    | -     | 4(4)   | -   | -   | 15% |            |
|                                                                      | - | - | F |        | -   | -   | 141 | -    | -      | 3(3)   | -    | -     | 3(3)   | -   | -   | 10% |            |
|                                                                      | - | - | G |        | -   | -   | 125 | -    | -      | 2(2)   | -    | -     | 2(2)   | -   | -   | 6%  |            |
| Malate dehydrogenase, partial                                        | - | - | A | 43114  | -   | -   | 63  | -    | -      | 1(1)   | -    | -     | 1(1)   | -   | -   | 2%  | KRY47491.1 |
| Mannose-6-phosphate isomerase, partial                               | A | A | A | 47870  | 329 | 181 | 236 | 9(9) | 6(6)   | 7(7)   | 7(7) | 4(4)  | 5(5)   | 23% | 14% | 15% | KRY55073.1 |
| Mediator of RNA polymerase II transcription subunit 23               | B | B | B | 258401 | 78  | 145 | 151 | 1(1) | 3(3)   | 2(2)   | 1(1) | 3(3)  | 2(2)   | 0%  | 1%  | 1%  | KRY54660.1 |
|                                                                      | - | C | - |        | -   | 100 | -   | -    | 1(1)   | -      | -    | 1(1)  | -      | -   | 0%  | -   |            |
| Medium-chain specific acyl-CoA dehydrogenase, mitochondrial, partial | A | A | A | 46251  | 167 | 136 | 209 | 3(3) | 4(4)   | 6(5)   | 3(3) | 4(4)  | 65(5)  | 8%  | 10% | 12% | KRY52707.1 |
| Mesocentin                                                           | - | - | E | 363972 | -   | -   | 88  | -    | -      | 1(1)   | -    | -     | 1(1)   | -   | -   | 0%  | KRY60969.1 |
|                                                                      | - | - | G |        | -   | -   | 154 | -    | -      | 2(2)   | -    | -     | 2(2)   | -   | -   | 0%  |            |
| Methionine aminopeptidase 1, partial                                 | A | A | A | 45052  | 107 | 137 | 134 | 2(2) | 5(4)   | 3(3)   | 2(2) | 5(4)  | 3(3)   | 5%  | 13% | 8%  | KRY48197.1 |
| Methionine--tRNA ligase, cytoplasmic, partial                        | D | - | - | 102963 | 99  | -   | -   | 1(1) | -      | -      | 1(1) | -     | -      | 1%  | -   | -   | KRY51150.1 |
| Methylmalonyl-CoA mutase, mitochondrial                              | C | C | C | 96758  | 232 | 246 | 237 | 5(5) | 6(6)   | 4(4)   | 5(5) | 6(6)  | 4(4)   | 8%  | 8%  | 6%  | KRY55816.1 |
| Mitochondrial chaperone BCS1                                         | A | - | - | 168033 | 103 | -   | -   | 1(1) | -      | -      | 1(1) | -     | -      | 1%  | -   | -   | KRY58920.1 |
| Mitochondrial EF-Tu1 precursor                                       | B | B | B | 53698  | 88  | 232 | 226 | 2(2) | 7(7)   | 7(6)   | 2(2) | 7(7)  | 7(6)   | 4%  | 15% | 17% | BAF32575.1 |
|                                                                      | - | - | E |        | -   | -   | 62  | -    | -      | 1(1)   | -    | -     | 1(1)   | -   | -   | 2%  |            |
| Mitochondrial inner membrane protein                                 | C | C | C | 51259  | 139 | 123 | 101 | 4(3) | 2(2)   | 1(1)   | 4(3) | 2(2)  | 1(1)   | 9%  | 5%  | 3%  | KRY52343.1 |
| Mitochondrial ornithine transporter 1                                | B | B | B | 131282 | 107 | 126 | 120 | 2(2) | 3(3)   | 2(2)   | 2(2) | 3(3)  | 2(2)   | 2%  | 3%  | 2%  | KRY52596.1 |
| Mitochondrial succinyl-CoA ligase subunit beta -like protein         | A | A | A | 47920  | 233 | 196 | 249 | 7(7) | 6(6)   | 7(7)   | 7(7) | 6(6)  | 7(7)   | 20% | 15% | 20% | KRY60682.1 |
|                                                                      | - | B | - |        | -   | 96  | -   | -    | 1(1)   | -      | -    | 1(1)  | -      | -   | 2%  | -   |            |
|                                                                      | - | C | C |        | -   | 70  | 65  | -    | 2(1)   | 1(1)   | -    | 2(1)  | 1(1)   | -   | 4%  | 2%  |            |
| Mitochondrial-processing peptidase subunit alpha                     | A | A | A | 114673 | 150 | 145 | 163 | 4(3) | 4(3)   | 4(4)   | 4(3) | 4(3)  | 4(4)   | 4%  | 4%  | 4%  | KRY50357.1 |
| Mitochondrial-processing peptidase subunit beta                      | A | A | A | 95488  | 118 | 73  | 96  | 4(4) | 2(2)   | 2(2)   | 4(4) | 2(2)  | 2(2)   | 5%  | 2%  | 2%  | KRY53080.1 |
|                                                                      | B | B | B |        | 281 | 414 | 519 | 8(8) | 11(10) | 14(14) | 7(7) | 10(9) | 11(11) | 11% | 15% | 16% |            |
| Molybdenum cofactor synthesis protein cinnamon                       | - | C | C | 71831  | -   | 99  | 77  | -    | 2(2)   | 1(1)   | -    | 2(2)  | 1(1)   | -   | 3%  | 1%  | KRY53927.1 |
| Mitochondrial isocitrate dehydrogenase, partial                      | A | A | A | 91260  | 147 | 93  | 129 | 4(4) | 1(1)   | 2(2)   | 4(4) | 1(1)  | 2(2)   | 6%  | 1%  | 3%  | KRY60163.1 |
| mRNA-capping enzyme                                                  | C | - | - | 63559  | 66  | -   | -   | 1(1) | -      | -      | 1(1) | -     | -      | 2%  | -   | -   | KRY57625.1 |
| Multiple epidermal growth factor-like domains protein 11             | - | - | E | 126169 | -   | -   | 77  | -    | -      | 2(2)   | -    | -     | 2(2)   | -   | -   | 2%  | KRY57673.1 |
| Muscle M-line assembly protein unc-89                                | - | - | E | 822834 | -   | -   | 82  | -    | -      | 2(2)   | -    | -     | 2(2)   | -   | -   | 0%  | KRY53785.1 |
|                                                                      | - | - | G |        | -   | -   | 70  | -    | -      | 1(1)   | -    | -     | 1(1)   | -   | -   | 0%  |            |
| Myophilin                                                            | - | A | A | 29149  | -   | 94  | 91  | -    | 1(1)   | 1(1)   | -    | 1(1)  | 1(1)   | -   | 4%  | 4%  | KRY53866.1 |
|                                                                      | - | B | B |        | -   | 101 | 98  | -    | 1(1)   | 1(1)   | -    | 1(1)  | 1(1)   | -   | 4%  | 4%  |            |
|                                                                      | C | C | C |        | 95  | 106 | 78  | 1(1) | 1(1)   | 1(1)   | 1(1) | 1(1)  | 1(1)   | 4%  | 4%  | 5%  |            |
|                                                                      | D | - | - |        | 137 | -   | -   | 2(2) | -      | -      | 2(2) | -     | -      | 11% | -   | -   |            |
|                                                                      | - | - | E |        | -   | -   | 74  | -    | -      | 1(1)   | -    | -     | 1(1)   | -   | -   | 5%  |            |
|                                                                      | - | - | F |        | -   | -   | 96  | -    | -      | 1(1)   | -    | -     | 1(1)   | -   | -   | 4%  |            |
| Myosin heavy chain, non-muscle                                       | - | - | G | 234900 | -   | -   | 82  | -    | -      | 2(2)   | -    | -     | 2(2)   | -   | -   | 0%  | KRY59395.1 |
| Myosin regulatory light chain 1, partial                             | - | C | - | 21489  | -   | 98  | -   | -    | 1(1)   | -      | -    | 1(1)  | -      | -   | 7%  | -   | KRY55173.1 |
|                                                                      | D | D | - |        | 100 | 97  | -   | 1(1) | 1(1)   | -      | 1(1) | 1(1)  | -      | 7%  | 7%  | -   |            |
|                                                                      | - | - | G |        | -   | -   | 76  | -    | -      | 2(2)   | -    | -     | 2(2)   | -   | -   | 13% |            |
| Myosin-4, partial                                                    | A | A | A | 233904 | 172 | 172 | 116 | 6(6) | 4(4)   | 2(2)   | 6(6) | 4(4)  | 2(2)   | 4%  | 2%  | 1%  | KRY50587.1 |
|                                                                      | - | B | B |        | -   | 75  | 87  | -    | 1(1)   | 1(1)   | -    | 1(1)  | 1(1)   | -   | 0%  | 0%  |            |

|                                                            |   |   |   |        |      |      |      |        |        |        |        |        |        |     |     |     |                      |
|------------------------------------------------------------|---|---|---|--------|------|------|------|--------|--------|--------|--------|--------|--------|-----|-----|-----|----------------------|
|                                                            | C | C | C |        | 646  | 848  | 407  | 18(17) | 21(19) | 12(11) | 16(15) | 18(16) | 9(8)   | 11% | 12% | 5%  |                      |
|                                                            | D | D | D |        | 1145 | 709  | 312  | 33(30) | 20(19) | 12(12) | 30(27) | 19(18) | 12(12) | 18% | 11% | 7%  |                      |
|                                                            | - | - | E |        | -    | -    | 1645 | -      | -      | 60(59) | -      | -      | 47(46) | -   | -   | 26% |                      |
|                                                            | - | - | F |        | -    | -    | 1611 | -      | -      | 54(53) | -      | -      | 44(43) | -   | -   | 24% |                      |
|                                                            | - | - | G |        | -    | -    | 1514 | -      | -      | 55(54) | -      | -      | 45(44) | -   | -   | 23% |                      |
| N-acetyltransferase 10                                     | C | C | - | 237253 | 64   | 79   | -    | 1(1)   | 1(1)   | -      | 1(1)   | 1(1)   | -      | 0%  | 0%  | -   | KRY54548.1           |
| NAD kinase 2, mitochondrial, partial                       | - | B | B | 53835  | -    | 113  | 148  | -      | 2(2)   | 2(2)   | -      | 2(2)   | 2(2)   | -   | 6%  | 6%  | KRY54079.1           |
| NAD(P) transhydrogenase, mitochondrial                     | D | D | D | 114749 | 201  | 210  | 73   | 4(4)   | 4(4)   | 1(1)   | 4(4)   | 4(4)   | 1(1)   | 4%  | 4%  | 1%  | KRY57619.1           |
|                                                            | - | - | E |        | -    | -    | 115  | -      | -      | 2(2)   | -      | -      | 2(2)   | -   | -   | 2%  |                      |
|                                                            | - | - | G |        | -    | -    | 89   | -      | -      | 1(1)   | -      | -      | 1(1)   | -   | -   | 1%  |                      |
| NAD-dependent alcohol dehydrogenase                        | - | D | - | 28802  | -    | 61   | -    | -      | 1(1)   | -      | -      | 1(1)   | -      | -   | 4%  | -   | KRY47388.1           |
| NADP-dependent malic enzyme, mitochondrial, partial        | B | B | B | 136914 | 79   | 100  | 118  | 2(2)   | 3(3)   | 5(4)   | 2(2)   | 3(3)   | 5(4)   | 1%  | 2%  | 4%  | KRY59664.1           |
|                                                            | C | C | C |        | 1956 | 1170 | 1184 | 46(45) | 31(31) | 31(31) | 26(25) | 22(22) | 24(24) | 26% | 23% | 27% |                      |
|                                                            | D | D | D |        | 306  | 108  | 93   | 10(9)  | 3(2)   | 1(1)   | 10(9)  | 3(2)   | 1(1)   | 11% | 2%  | 0%  |                      |
|                                                            | - | - | E |        | -    | -    | 214  | -      | -      | 7(7)   | -      | -      | 6(6)   | -   | -   | 5%  |                      |
|                                                            | - | - | F |        | -    | -    | 137  | -      | -      | 3(3)   | -      | -      | 3(3)   | -   | -   | 2%  |                      |
|                                                            | - | - | G |        | -    | -    | 142  | -      | -      | 3(3)   | -      | -      | 3(3)   | -   | -   | 2%  |                      |
| NADP-dependent malic enzyme, partial                       | C | C | - | 67015  | 160  | 154  | -    | 6(6)   | 5(4)   | -      | 6(6)   | 5(4)   | -      | 12% | 6%  | -   | KRY50082.1           |
| NADPH-dependent diflavin oxidoreductase 1                  | C | C | - | 68945  | 91   | 73   | -    | 1(1)   | 1(1)   | -      | 1(1)   | 1(1)   | -      | 2%  | 2%  | -   | KRY52027.1           |
| Nedd8-activating enzyme E1 regulatory subunit              | - | - | B | 81417  | -    | -    | 72   | -      | -      | 1(1)   | -      | -      | 1(1)   | -   | -   | 1%  | KRY49521.1           |
|                                                            | - | - | C |        | -    | -    | 154  | -      | -      | 2(2)   | -      | -      | 2(2)   | -   | -   | 4%  |                      |
|                                                            | D | - | - |        | 82   | -    | -    | 1(1)   | -      | -      | 1(1)   | -      | -      | 1%  | -   | -   |                      |
| Neurogenic locus notch -like protein                       | - | D | - | 478274 | -    | 61   | -    | -      | 1(1)   | -      | -      | 1(1)   | -      | -   | 0%  | -   | KRY46373.1           |
| Neuroglian                                                 | C | C | C | 151761 | 221  | 229  | 217  | 4(4)   | 5(5)   | 3(3)   | 4(4)   | 5(5)   | 3(3)   | 3%  | 5%  | 4%  | KRY57340.11<br>51761 |
|                                                            | D | - | D |        | 85   | -    | 76   | 1(1)   | -      | 1(1)   | 1(1)   | -      | 1(1)   | 0%  | -   | 0%  |                      |
|                                                            | - | - | E |        | -    | -    | 274  | -      | -      | 7(7)   | -      | -      | 7(7)   | -   | -   | 6%  |                      |
|                                                            | - | - | F |        | -    | -    | 76   | -      | -      | 1(1)   | -      | -      | 1(1)   | -   | -   | 0%  |                      |
| Neutral alpha-glucosidase AB                               | D | - | - | 132754 | 148  | -    | -    | 3(3)   | -      | -      | 3(3)   | -      | -      | 4%  | -   | -   | KRY60908.1           |
|                                                            | - | - | E |        | -    | -    | 84   | -      | -      | 1(1)   | -      | -      | 1(1)   | -   | -   | 0%  |                      |
| Nicalin-1                                                  | C | C | C | 67341  | 60   | 60   | 66   | 1(1)   | 1(1)   | 1(1)   | 1(1)   | 1(1)   | 1(1)   | 1%  | 1%  | 1%  | KRY55697.1           |
| Nicastrin, partial                                         | D | - | D | 84040  | 117  | -    | 82   | 3(3)   | -      | 1(1)   | 3(3)   | -      | 1(1)   | 5%  | -   | 1%  | KRY58667.1           |
| Nicotinamide phosphoribosyltransferase, partial            | - | B | - | 54479  | -    | 75   | -    | -      | 1(1)   | -      | -      | 1(1)   | -      | -   | 2%  | -   | KRY61111.1           |
| Nidogen-1                                                  | - | - | E | 194996 | -    | -    | 91   | -      | -      | 2(2)   | -      | -      | 2(2)   | -   | -   | 1%  | KRY48612.1           |
|                                                            | - | - | F |        | -    | -    | 91   | -      | -      | 1(1)   | -      | -      | 1(1)   | -   | -   | 0%  |                      |
| Nodal modulator 1                                          | - | - | E | 254703 | -    | -    | 62   | -      | -      | 1(1)   | -      | -      | 1(1)   | -   | -   | 0%  | KRY49785.1           |
| Non-POU domain-containing octamer-binding protein, partial | - | B | - | 51272  | -    | 65   | -    | -      | 1(1)   | -      | -      | 1(1)   | -      | -   | 2%  | -   | KRY59182.1           |
| NSFL1 cofactor p47                                         | - | A | A | 96155  | -    | 64   | 76   | -      | 1(1)   | 1(1)   | -      | 1(1)   | 1(1)   | -   | 1%  | 1%  | KRY55488.1           |
|                                                            | - | - | B |        | -    | -    | 61   | -      | -      | 1(0)   | -      | -      | 1(0)   | -   | -   | 1%  |                      |
| Nuclear export mediator factor Nemf                        | B | - | B | 96804  | 91   | -    | 78   | 1(1)   | -      | 2(1)   | 1(1)   | -      | 2(1)   | 1%  | -   | 2%  | KRY60186.1           |
| Nuclease domain-containing protein                         | C | C | C | 105353 | 63   | 90   | 68   | 1(1)   | 1(1)   | 2(2)   | 1(1)   | 1(1)   | 2(2)   | 0%  | 1%  | 2%  | KRY53536.1           |
|                                                            | D | D | D |        | 409  | 363  | 127  | 11(11) | 10(10) | 3(3)   | 10(10) | 10(10) | 3(3)   | 12% | 12% | 3%  |                      |
|                                                            | - | - | E |        | -    | -    | 163  | -      | -      | 5(5)   | -      | -      | 5(5)   | -   | -   | 5%  |                      |
|                                                            | - | - | G |        | -    | -    | 108  | -      | -      | 2(2)   | -      | -      | 2(2)   | -   | -   | 2%  |                      |
| Nucleolar GTP-binding protein 1                            | - | A | - | 217720 | -    | 80   | -    | -      | 1(1)   | -      | -      | 1(1)   | -      | -   | 0%  | -   | KRY59079.1           |
| Nucleosome assembly protein 1-like 4                       | - | - | A | 42769  | -    | -    | 67   | -      | -      | 1(1)   | -      | -      | 1(1)   | -   | -   | 2%  | KRY56244.1           |
|                                                            | B | B | B |        | 111  | 171  | 205  | 4(4)   | 4(4)   | 5(5)   | 4(4)   | 4(4)   | 5(5)   | 12% | 19% | 21% |                      |
| NudC domain-containing protein 1                           | C | C | - | 70408  | 203  | 115  | -    | 5(5)   | 4(4)   | -      | 5(5)   | 4(4)   | -      | 8%  | 4%  | -   | KRY59809.1           |
| Obg-like ATPase 1                                          | A | A | A | 46859  | 257  | 129  | 300  | 9(9)   | 3(2)   | 9(9)   | 9(9)   | 3(2)   | 9(9)   | 24% | 7%  | 25% | KRY54762.1           |

|                                                                             |   |   |   |        |     |      |     |        |        |        |        |        |        |     |     |     |            |
|-----------------------------------------------------------------------------|---|---|---|--------|-----|------|-----|--------|--------|--------|--------|--------|--------|-----|-----|-----|------------|
|                                                                             | - | B | - |        | -   | 63   | -   | -      | 1(1)   | -      | -      | 1(1)   | -      | -   | 2%  | -   |            |
| Oligosaccharyltransferase complex subunit OSTC                              | A | A | - | 35534  | 98  | 78   | -   | 1(1)   | 1(1)   | -      | 1(1)   | 1(1)   | -      | 4%  | 4%  | -   | KRY48322.1 |
|                                                                             | - | B | B |        | -   | 66   | 105 | -      | 1(1)   | 1(1)   | -      | 1(1)   | 1(1)   | -   | 4%  | 4%  |            |
|                                                                             | C | C | C |        | 97  | 87   | 91  | 1(1)   | 1(1)   | 1(1)   | 1(1)   | 1(1)   | 1(1)   | 4%  | 4%  | 4%  |            |
|                                                                             | D | D | - |        | 111 | 86   | -   | 1(1)   | 1(1)   | -      | 1(1)   | 1(1)   | -      | 4%  | 4%  | -   |            |
| Ornithine decarboxylase, partial                                            | A | A | A | 146144 | 161 | 142  | 158 | 3(3)   | 2(2)   | 3(3)   | 3(3)   | 2(2)   | 3(3)   | 4%  | 2%  | 3%  | KRY52484.1 |
| Oxysterol-binding protein-related protein 9                                 | D | - | - | 92864  | 94  | -    | -   | 2(2)   | -      | -      | 2(2)   | -      | -      | 2%  | -   | -   | KRY56357.1 |
| Papilin, partial                                                            | A | A | A | 248330 | 65  | 137  | 83  | 1(1)   | 2(2)   | 1(1)   | 1(1)   | 2(2)   | 1(1)   | 0%  | 1%  | 0%  | KRY57082.1 |
|                                                                             | - | D | - | 250404 | -   | 102  | -   | -      | 1(1)   | -      | -      | 1(1)   | -      | -   | 0%  | -   | KRY54791.1 |
|                                                                             | - | - | E |        | -   | -    | 65  | -      | -      | 1(1)   | -      | -      | 1(1)   | -   | -   | 0%  |            |
|                                                                             | - | - | G |        | -   | -    | 89  | -      | -      | 3(3)   | -      | -      | 3(3)   | -   | -   | 1%  |            |
| Paramyosin, partial                                                         | C | C | C | 96956  | 193 | 227  | 149 | 4(4)   | 5(5)   | 4(4)   | 4(4)   | 5(5)   | 4(4)   | 6%  | 7%  | 5%  | KRY49321.1 |
|                                                                             | - | D | D |        | -   | 1580 | 603 | -      | 51(49) | 19(19) | -      | 35(34) | 17(17) | -   | 43% | 24% |            |
|                                                                             | - | - | E |        | -   | -    | 377 | -      | -      | 13(13) | -      | -      | 13(13) | -   | -   | 17% |            |
|                                                                             | - | - | F |        | -   | -    | 209 | -      | -      | 6(6)   | -      | -      | 6(6)   | -   | -   | 7%  |            |
|                                                                             | - | - | G |        | -   | -    | 278 | -      | -      | 10(10) | -      | -      | 9(9)   | -   | -   | 12% |            |
| PDZ and LIM domain protein Zasp, partial                                    | - | - | B | 87739  | -   | -    | 61  | -      | -      | 1(1)   | -      | -      | 1(1)   | -   | -   | 1%  | KRY58370.1 |
| Pecanex-like protein 1                                                      | D | D | - | 364322 | 131 | 66   | -   | 5(4)   | 1(1)   | -      | 5(4)   | 1(1)   | -      | 1%  | 0%  | -   | KRY53192.1 |
| Peptidyl-glycine alpha-amidating monooxygenase A                            | D | D | - | 47555  | 120 | 73   | -   | 1(1)   | 1(1)   | -      | 1(1)   | 1(1)   | -      | 4%  | 4%  | -   | KRY57729.1 |
| Peroxiredoxin-2, partial                                                    | A | A | A | 23367  | 317 | 251  | 260 | 6(6)   | 4(4)   | 5(5)   | 6(6)   | 4(4)   | 5(5)   | 39% | 29% | 29% | KRY49990.1 |
|                                                                             | - | - | B |        | -   | -    | 63  | -      | -      | 1(1)   | -      | -      | 1(1)   | -   | -   | 5%  |            |
|                                                                             | C | C | C |        | 110 | 98   | 93  | 1(1)   | 2(2)   | 1(1)   | 1(1)   | 2(2)   | 1(1)   | 5%  | 10% | 8%  |            |
|                                                                             | - | - | E |        | -   | -    | 95  | -      | -      | 1(1)   | -      | -      | 1(1)   | -   | -   | 5%  |            |
| Phenylalanine--tRNA ligase beta subunit                                     | C | C | C | 70907  | 159 | 241  | 144 | 4(4)   | 8(8)   | 4(4)   | 4(4)   | 8(8)   | 4(4)   | 6%  | 14% | 6%  | KRY59452.1 |
| Phosphate carrier protein, mitochondrial, partial                           | A | - | - | 69926  | 90  | -    | -   | 1(1)   | -      | -      | 1(1)   | -      | -      | 2%  | -   | -   | KRY57035.1 |
|                                                                             | - | B | B |        | -   | 138  | 157 | -      | 2(2)   | 3(3)   | -      | 2(2)   | 3(3)   | -   | 4%  | 6%  |            |
| Phosphoacetylglucosamine mutase                                             | C | - | - | 76610  | 76  | -    | -   | 1(1)   | -      | -      | 1(1)   | -      | -      | 1%  | -   | -   | KRY55926.1 |
|                                                                             | - | - | E |        | -   | -    | 86  | -      | -      | 1(1)   | -      | -      | 1(1)   | -   | -   | 1%  |            |
| Phosphoglucomutase-1                                                        | B | - | B | 62761  | 68  | -    | 64  | 1(1)   | -      | 1(1)   | 1(1)   | -      | 1(1)   | 1%  | -   | 2%  | KRY58984.1 |
|                                                                             | C | C | C |        | 371 | 195  | 167 | 10(10) | 5(5)   | 6(6)   | 9(9)   | 5(5)   | 6(6)   | 18% | 11% | 10% |            |
|                                                                             | D | D | - |        | 81  | 70   | -   | 1(1)   | 1(1)   | -      | 1(1)   | 1(1)   | -      | 1%  | 1%  | -   |            |
| Phosphoinositide 3-kinase regulatory subunit 4, partial                     | - | A | A | 249279 | -   | 208  | 160 | -      | 5(5)   | 3(3)   | -      | 5(5)   | 3(3)   | -   | 2%  | 1%  | KRY53638.1 |
|                                                                             | - | C | C |        | -   | 83   | 94  | -      | 1(1)   | 1(1)   | -      | 1(1)   | 1(1)   | -   | 0%  | 0%  |            |
|                                                                             | D | D | - |        | 81  | 116  | -   | 1(1)   | 2(2)   | -      | 1(1)   | 2(2)   | -      | 0%  | 1%  | -   |            |
|                                                                             | - | - | E |        | -   | -    | 73  | -      | -      | 1(1)   | -      | -      | 1(1)   | -   | -   | 0%  |            |
| Phospholipase A-2-activating protein                                        | - | - | G | 90526  | -   | -    | 70  | -      | -      | 1(1)   | -      | -      | 1(1)   | -   | -   | 1%  | KRY60109.1 |
| Phosphoribosyl pyrophosphate synthase-associated protein 2, partial         | - | B | B | 89366  | -   | 139  | 130 | -      | 4(4)   | 4(4)   | -      | 3(3)   | 4(4)   | -   | 4%  | 6%  | KRY59095.1 |
| Phosphorylase b kinase gamma catalytic chain, skeletal muscle/heart isoform | - | - | A | 47526  | -   | -    | 66  | -      | -      | 1(1)   | -      | -      | 1(1)   | -   | -   | 1%  | KRY59142.1 |
| Plasminogen                                                                 | - | C | - | 84221  | -   | 67   | -   | -      | 1(1)   | -      | -      | 1(1)   | -      | -   | 1%  | -   | KRY53811.1 |
| Plexin domain-containing protein 2                                          | D | - | - | 56442  | 68  | -    | -   | 2(2)   | -      | -      | 2(2)   | -      | -      | 4%  | -   | -   | KRY53501.1 |
| pliceosome RNA helicase DDX39B                                              | - | B | - | 83161  | -   | 175  | -   | -      | 6(6)   | -      | -      | 6(6)   | -      | -   | 8%  | -   | KRY50703.1 |
| Poly(U)-specific endoribonuclease -like protein, partial                    | A | - | A | 61077  | 73  | -    | 60  | 2(2)   | -      | 1(1)   | 2(2)   | -      | 1(1)   | 3%  | -   | 2%  | KRY51160.1 |
| Polyadenylate-binding protein                                               | - | A | A | 63357  | -   | 120  | 97  | -      | 2(2)   | 2(2)   | -      | 2(2)   | 2(2)   | -   | 5%  | 3%  | KRY49582.1 |
|                                                                             | B | B | B |        | 68  | 89   | 143 | 1(1)   | 1(1)   | 3(3)   | 1(1)   | 1(1)   | 3(3)   | 2%  | 3%  | 7%  |            |
|                                                                             | - | C | C |        | -   | 461  | 504 | -      | 13(13) | 16(16) | -      | 13(13) | 15(15) | -   | 28% | 28% |            |
| Polyadenylate-binding protein 1, partial                                    | A | - | - | 90660  | 187 | -    | -   | 4(4)   | -      | -      | 4(4)   | -      | -      | 6%  | -   | -   | KRY49578.1 |
|                                                                             | C | - | - |        | 364 | -    | -   | 11(11) | -      | -      | 11(11) | -      | -      | 18% | -   | -   |            |



|                                                              |   |   |   |        |     |     |     |      |        |        |      |        |       |     |     |     |            |
|--------------------------------------------------------------|---|---|---|--------|-----|-----|-----|------|--------|--------|------|--------|-------|-----|-----|-----|------------|
| Poly-cysteine and histidine-tailed protein, partial          | D | D | - | 53251  | 68  | 76  | -   | 1(1) | 1(1)   | -      | 1(1) | 1(1)   | -     | 1%  | 1%  | -   | KRY58369.1 |
|                                                              | - | - | E |        | -   | -   | 76  | -    | -      | 1(1)   | -    | -      | 1(1)  | -   | -   | 1%  |            |
|                                                              | - | - | G |        | -   | -   | 64  | -    | -      | 1(1)   | -    | -      | 1(1)  | -   | -   | 1%  |            |
| Polyribonucleotide nucleotidyltransferase 1, mitochondrial   | C | C | - | 137745 | 103 | 148 | -   | 2(1) | 3(3)   | -      | 2(1) | 3(3)   | -     | 2%  | 2%  | -   | KRY55114.1 |
|                                                              | - | D | - |        | -   | 69  | -   | -    | 1(1)   | -      | -    | 1(1)   | -     | -   | 1%  | -   |            |
| Polyubiquitin                                                | A | A | A | 71793  | 99  | 103 | 103 | 1(1) | 1(1)   | 1(1)   | 1(1) | 1(1)   | 1(1)  | 2%  | 2%  | 2%  | KRY46475.1 |
|                                                              | B | B | B |        | 84  | 124 | 72  | 2(2) | 2(1)   | 1(1)   | 2(2) | 2(1)   | 1(1)  | 3%  | 3%  | 2%  |            |
|                                                              | - | C | C |        | -   | 60  | 135 | -    | 1(0)   | 2(2)   | -    | 1(0)   | 2(2)  | -   | 1%  | 2%  |            |
|                                                              | - | D | D |        | -   | 121 | 70  | -    | 1(1)   | 1(1)   | -    | 1(1)   | 1(1)  | -   | 2%  | 2%  |            |
|                                                              | - | - | E |        | -   | -   | 106 | -    | -      | 1(1)   | -    | -      | 1(1)  | -   | -   | 2%  |            |
|                                                              | - | - | F |        | -   | -   | 114 | -    | -      | 1(1)   | -    | -      | 1(1)  | -   | -   | 2%  |            |
|                                                              | - | - | G |        | -   | -   | 110 | -    | -      | 1(1)   | -    | -      | 1(1)  | -   | -   | 2%  |            |
| Polyubiquitin -like protein, partial                         | - | - | A | 12545  | -   | -   | 103 | -    | -      | 1(1)   | -    | -      | 1(1)  | -   | -   | 14% | KRY37210.1 |
|                                                              | B | B | B |        | 84  | 124 | 72  | 2(2) | 2(1)   | 1(1)   | 2(2) | 2(1)   | 1(1)  | 22% | 22% | 14% |            |
|                                                              | - | C | C |        | -   | 60  | 135 | -    | 1(0)   | 2(2)   | -    | 1(0)   | 2(2)  | -   | 8%  | 14% |            |
|                                                              | - | D | D |        | -   | 121 | 70  | -    | 1(1)   | 1(1)   | -    | 1(1)   | 1(1)  | -   | 14% | 14% |            |
|                                                              | - | - | E |        | -   | -   | 106 | -    | -      | 1(1)   | -    | -      | 1(1)  | -   | -   | 14% |            |
|                                                              | - | - | F |        | -   | -   | 114 | -    | -      | 1(1)   | -    | -      | 1(1)  | -   | -   | 14% |            |
|                                                              | - | - | G |        | -   | -   | 110 | -    | -      | 1(1)   | -    | -      | 1(1)  | -   | -   | 14% |            |
| Polyubiquitin-B, partial                                     | A | A | A | 17394  | 99  | 103 | 103 | 1(1) | 1(1)   | 1(1)   | 1(1) | 1(1)   | 1(1)  | 10% | 10% | 10% | KRY44570.1 |
|                                                              | B | B | B |        | 84  | 124 | 72  | 2(2) | 2(1)   | 1(1)   | 2(2) | 2(1)   | 1(1)  | 16% | 16% | 10% |            |
|                                                              | - | C | C |        | -   | 60  | 135 | -    | 1(0)   | 2(2)   | -    | 1(0)   | 2(2)  | -   | 5%  | 11% |            |
|                                                              | - | D | D |        | -   | 121 | 70  | -    | 1(1)   | 1(1)   | -    | 1(1)   | 1(1)  | -   | 10% | 10% |            |
|                                                              | - | - | E |        | -   | -   | 106 | -    | -      | 1(1)   | -    | -      | 1(1)  | -   | -   | 10% |            |
|                                                              | - | - | F |        | -   | -   | 114 | -    | -      | 1(1)   | -    | -      | 1(1)  | -   | -   | 10% |            |
|                                                              | - | - | G |        | -   | -   | 110 | -    | -      | 1(1)   | -    | -      | 1(1)  | -   | -   | 10% |            |
| Polyubiquitin-C                                              | A | A | A | 39424  | 99  | 103 | 103 | 1(1) | 1(1)   | 1(1)   | 1(1) | 1(1)   | 1(1)  | 4%  | 4%  | 4%  | KRY55776.1 |
|                                                              | B | B | B |        | 84  | 124 | 72  | 2(2) | 2(1)   | 1(1)   | 2(2) | 2(1)   | 1(1)  | 7%  | 7%  | 4%  |            |
|                                                              | - | C | - |        | -   | 60  | -   | -    | 1(0)   | -      | -    | 1(0)   | -     | -   | 2%  | -   |            |
|                                                              | - | D | D |        | -   | 121 | 70  | -    | 1(1)   | 1(1)   | -    | 1(1)   | 1(1)  | -   | 4%  | 4%  |            |
|                                                              | - | - | E |        | -   | -   | 106 | -    | -      | 1(1)   | -    | -      | 1(1)  | -   | -   | 4%  |            |
|                                                              | - | - | F |        | -   | -   | 114 | -    | -      | 1(1)   | -    | -      | 1(1)  | -   | -   | 4%  |            |
|                                                              | - | - | G |        | -   | -   | 110 | -    | -      | 1(1)   | -    | -      | 1(1)  | -   | -   | 4%  |            |
| Polyubiquitin-C, partial                                     | - | - | C | 75000  | -   | -   | 135 | -    | -      | 2(2)   | -    | -      | 2(2)  | -   | -   | 2%  | KRY45530.1 |
| PRA1 family protein 2                                        | - | - | G | 21421  | -   | -   | 92  | -    | -      | 1(1)   | -    | -      | 1(1)  | -   | -   | 5%  | KRY51440.1 |
| Proliferation-associated protein 2G4, partial                | A | A | A | 49607  | 135 | 168 | 139 | 4(4) | 4(4)   | 5(4)   | 4(4) | 4(4)   | 5(4)  | 9%  | 11% | 12% | KRY53054.1 |
|                                                              | B | B | B |        | 196 | 327 | 321 | 6(6) | 11(11) | 10(10) | 6(6) | 11(11) | 9(9)  | 14% | 27% | 26% |            |
| Prolyl 4-hydroxylase subunit alpha-2                         | C | C | C | 130247 | 89  | 82  | 82  | 2(2) | 2(2)   | 1(1)   | 2(2) | 2(2)   | 1(1)  | 2%  | 2%  | 1%  | KRY58929.1 |
| Propionyl-CoA carboxylase alpha chain, mitochondrial         | A | - | - | 441396 | 66  | -   | -   | 1(1) | -      | -      | 1(1) | -      | -     | 0%  | -   | -   | KRY51819.1 |
|                                                              | B | B | B |        | 67  | 128 | 93  | 1(1) | 2(2)   | 1(1)   | 1(1) | 2(2)   | 1(1)  | 0%  | 0%  | 0%  |            |
|                                                              | C | - | C |        | 241 | -   | 220 | 4(4) | -      | 5(5)   | 4(4) | -      | 5(5)  | 1%  | -   | 1%  |            |
|                                                              | - | D | D |        | -   | 187 | 121 | -    | 5(5)   | 1(1)   | -    | 5(5)   | 1(1)  | -   | 1%  | 0%  |            |
|                                                              | - | - | F |        | -   | -   | 151 | -    | -      | 3(3)   | -    | -      | 3(3)  | -   | -   | 0%  |            |
| Propionyl-CoA carboxylase beta chain, mitochondrial, partial | A | A | A | 59995  | 142 | 113 | 152 | 4(4) | 2(2)   | 3(3)   | 4(4) | 2(2)   | 3(3)  | 9%  | 4%  | 7%  | KRY52668.1 |
|                                                              | B | B | B |        | 273 | 417 | 281 | 8(8) | 11(11) | 10(9)  | 8(8) | 9(9)   | 10(9) | 18% | 22% | 21% |            |
|                                                              | C | C | C |        | 91  | 86  | 171 | 2(2) | 2(2)   | 5(5)   | 2(2) | 2(2)   | 5(5)  | 4%  | 4%  | 11% |            |
|                                                              | D | D | D |        | 87  | 200 | 123 | 3(3) | 5(5)   | 3(3)   | 3(3) | 5(5)   | 3(3)  | 6%  | 11% | 7%  |            |
|                                                              | - | - | E |        | -   | -   | 140 | -    | -      | 5(5)   | -    | -      | 5(5)  | -   | -   | 10% |            |
|                                                              | - | - | F |        | -   | -   | 125 | -    | -      | 3(3)   | -    | -      | 3(3)  | -   | -   | 6%  |            |

|                                                                                        |   |   |   |        |     |     |     |      |      |      |      |      |      |     |     |     |            |
|----------------------------------------------------------------------------------------|---|---|---|--------|-----|-----|-----|------|------|------|------|------|------|-----|-----|-----|------------|
|                                                                                        | - | - | G |        | -   | -   | 130 | -    | -    | 2(2) | -    | -    | 2(2) | -   | -   | 5%  |            |
| Proteasome subunit alpha type-3, partial                                               | - | - | C | 77206  | -   | -   | 81  | -    | -    | 1(1) | -    | -    | 1(1) | -   | -   | 2%  | KRY47615.1 |
| Proteasome subunit alpha type-6                                                        | - | - | C | 27985  | -   | -   | 99  | -    | -    | 1(1) | -    | -    | 1(1) | -   | -   | 5%  | KRY50620.1 |
| Protein AAR2 -like protein                                                             | - | A | A | 68097  | -   | 80  | 80  | -    | 1(1) | 1(1) | -    | 1(1) | 1(1) | -   | 1%  | 1%  | KRY56554.1 |
| Protein arginine N-methyltransferase 1, partial                                        | A | A | A | 41784  | 144 | 230 | 308 | 4(4) | 8(8) | 8(8) | 4(4) | 8(8) | 8(8) | 10% | 23% | 24% | KRY51927.1 |
| Protein arginine N-methyltransferase 6, partial                                        | - | A | - | 77995  | -   | 64  | -   | -    | 1(1) | -    | -    | 1(1) | -    | -   | 1%  | -   | KRY58901.1 |
| Protein argonaute-2                                                                    | - | C | C | 239895 | -   | 60  | 62  | -    | 1(0) | 1(1) | -    | 1(0) | 1(1) | -   | 0%  | 0%  | KRY49018.1 |
|                                                                                        | - | - | E |        | -   | -   | 78  | -    | -    | 1(1) | -    | -    | 1(1) | -   | -   | 0%  |            |
|                                                                                        | - | - | F |        | -   | -   | 71  | -    | -    | 1(1) | -    | -    | 1(1) | -   | -   | 0%  |            |
|                                                                                        | - | - | G |        | -   | -   | 78  | -    | -    | 1(1) | -    | -    | 1(1) | -   | -   | 0%  |            |
| Protein argonaute-2, partial                                                           | D | D | - | 106796 | 281 | 237 | -   | 9(9) | 6(6) | -    | 9(9) | 6(6) | -    | 14% | 9%  | -   | KRY60812.1 |
| Protein CLEC16A, partial                                                               | C | - | C | 246145 | 211 | -   | 133 | 5(5) | -    | 2(2) | 5(5) | -    | 2(2) | 3%  | -   | 1%  | KRY50389.1 |
| Protein DDI1 -like protein 2                                                           | - | B | B | 44709  | -   | 62  | 109 | -    | 1(1) | 3(3) | -    | 1(1) | 3(3) | -   | 5%  | 10% | KRY49840.1 |
| Protein disulfide-isomerase A6                                                         | A | A | - | 59296  | 86  | 121 | -   | 1(1) | 3(3) | -    | 1(1) | 3(3) | -    | 1%  | 7%  | -   | KRY54523.1 |
|                                                                                        | C | - | C |        | 84  | -   | 87  | 1(1) | -    | 1(1) | 1(1) | -    | 1(1) | 1%  | -   | 1%  |            |
|                                                                                        | D | - | - |        | 105 | -   | -   | 3(3) | -    | -    | 3(3) | -    | -    | 6%  | -   | -   |            |
|                                                                                        | - | - | F |        | -   | -   | 94  | -    | -    | 2(2) | -    | -    | 2(2) | -   | -   | 4%  |            |
| Protein disulfide-isomerase, partial                                                   | C | C | C | 84095  | 69  | 116 | 131 | 1(1) | 3(3) | 2(2) | 1(1) | 3(3) | 2(2) | 1%  | 4%  | 3%  | KRY60941.1 |
| Protein ERGIC-53, partial                                                              | B | B | B | 57042  | 70  | 71  | 79  | 2(2) | 1(1) | 1(1) | 2(2) | 1(1) | 1(1) | 3%  | 1%  | 1%  | KRY52865.1 |
| Protein HGV2                                                                           | - | C | - | 48344  | -   | 97  | -   | -    | 1(1) | -    | -    | 1(1) | -    | -   | 2%  | -   | KRY60606.1 |
| Protein HIRA                                                                           | - | C | C | 155136 | -   | 211 | 206 | -    | 5(5) | 5(5) | -    | 5(5) | 5(5) | -   | 4%  | 4%  | KRY45698.1 |
| Protein lap1                                                                           | C | - | - | 162713 | 65  | -   | -   | 1(1) | -    | -    | 1(1) | -    | -    | 0%  | -   | -   | KRY57372.1 |
| Protein LSM14 -like protein A                                                          | C | C | C | 51261  | 135 | 82  | 82  | 2(2) | 2(2) | 1(1) | 2(2) | 2(2) | 1(1) | 5%  | 5%  | 2%  | KRY47653.1 |
| Protein MON2 -like protein                                                             | - | B | B | 228385 | -   | 64  | 61  | -    | 1(1) | 1(1) | -    | 1(1) | 1(1) | -   | 0%  | 0%  | KRY53690.1 |
| Protein pad-1, partial                                                                 | A | - | A | 269147 | 72  | -   | 81  | 1(1) | -    | 1(1) | 1(1) | -    | 1(1) | 0%  | -   | 0%  | KRY55730.1 |
| Protein phosphatase 1E                                                                 | - | - | B | 48913  | -   | -   | 87  | -    | -    | 1(1) | -    | -    | 1(1) | -   | -   | 4%  | KRY55596.1 |
| Protein phosphatase methylesterase 1                                                   | - | - | A | 70545  | -   | -   | 67  | -    | -    | 1(1) | -    | -    | 1(1) | -   | -   | 1%  | KRY57191.1 |
| Protein Skeletor, isoforms B/C                                                         | C | C | C | 158475 | 162 | 206 | 156 | 3(3) | 5(5) | 3(3) | 3(3) | 5(5) | 3(3) | 2%  | 4%  | 3%  | KRY58447.1 |
| Protein Skeletor, isoforms D/E                                                         | C | C | - | 166013 | 162 | 206 | -   | 3(3) | 5(5) | -    | 3(3) | 5(5) | -    | 2%  | 4%  | -   | KRY58448.1 |
| Protein transport protein Sec24C                                                       | D | D | D | 131036 | 169 | 155 | 137 | 4(4) | 4(4) | 3(3) | 4(4) | 4(4) | 3(3) | 3%  | 4%  | 2%  | KRY54357.1 |
|                                                                                        | - | - | E |        | -   | -   | 172 | -    | -    | 4(4) | -    | -    | 4(4) | -   | -   | 4%  |            |
| Protein transport protein Sec61 subunit alpha isoform 2                                | - | A | - | 46439  | -   | 64  | -   | -    | 1(1) | -    | -    | 1(1) | -    | -   | 2%  | -   | KRY54101.1 |
| Protein UBASH3A -like protein                                                          | - | - | C | 142437 | -   | -   | 99  | -    | -    | 1(1) | -    | -    | 1(1) | -   | -   | 1%  | KRY56821.1 |
|                                                                                        | - | - | E |        | -   | -   | 104 | -    | -    | 1(1) | -    | -    | 1(1) | -   | -   | 1%  |            |
| Protein unc-45 -like protein A                                                         | D | - | - | 398201 | 127 | -   | -   | 1(1) | -    | -    | 1(1) | -    | -    | 0%  | -   | -   | KRY58313.1 |
| Proton myo-inositol cotransporter, partial                                             | C | - | - | 71203  | 86  | -   | -   | 2(2) | -    | -    | 2(2) | -    | -    | 3%  | -   | -   | KRY54302.1 |
| Pseudouridine-5'-monophosphatase                                                       | - | - | A | 70411  | -   | -   | 66  | -    | -    | 1(1) | -    | -    | 1(1) | -   | -   | 1%  | KRY55631.1 |
| Puromycin-sensitive aminopeptidase, partial                                            | D | D | - | 101232 | 94  | 87  | -   | 3(3) | 3(2) | -    | 3(3) | 3(2) | -    | 4%  | 2%  | -   | KRY58185.1 |
|                                                                                        | - | - | E |        | -   | -   | 76  | -    | -    | 1(1) | -    | -    | 1(1) | -   | -   | 1%  |            |
| putative [pyruvate dehydrogenase (acetyl-transferring)] kinase, mitochondrial, partial | A | A | A | 53118  | 181 | 111 | 157 | 4(4) | 3(2) | 3(3) | 3(3) | 3(2) | 3(3) | 8%  | 8%  | 8%  | KRY57184.1 |
| putative 26S proteasome regulatory subunit rpn-6.1                                     | B | - | B | 51807  | 94  | -   | 96  | 1(1) | -    | 1(1) | 1(1) | -    | 1(1) | 2%  | -   | 2%  | KRY56382.1 |
| putative aconitate hydratase, mitochondrial                                            | A | A | A | 232635 | 96  | 87  | 88  | 1(1) | 1(1) | 1(1) | 1(1) | 1(1) | 1(1) | 0%  | 0%  | 0%  | KRY56796.1 |
|                                                                                        | - | B | - |        | -   | 108 | -   | -    | 3(2) | -    | -    | 3(2) | -    | -   | 1%  | -   |            |
|                                                                                        | C | C | - |        | 97  | 80  | -   | 2(2) | 2(2) | -    | 2(2) | 2(2) | -    | 1%  | 1%  | -   |            |
|                                                                                        | D | D | D |        | 206 | 93  | 95  | 5(5) | 1(1) | 2(2) | 5(5) | 1(1) | 2(2) | 3%  | 0%  | 1%  |            |
|                                                                                        | - | - | E |        | -   | -   | 151 | -    | -    | 3(3) | -    | -    | 3(3) | -   | -   | 1%  |            |
|                                                                                        | - | - | F |        | -   | -   | 67  | -    | -    | 1(1) | -    | -    | 1(1) | -   | -   | 0%  |            |
|                                                                                        | - | - | G |        | -   | -   | 141 | -    | -    | 3(3) | -    | -    | 3(3) | -   | -   | 2%  |            |

|                                                                           |   |   |   |        |     |     |     |        |        |        |        |        |        |     |     |     |            |
|---------------------------------------------------------------------------|---|---|---|--------|-----|-----|-----|--------|--------|--------|--------|--------|--------|-----|-----|-----|------------|
| putative aminopeptidase W07G4.4                                           | C | C | C | 66737  | 660 | 331 | 420 | 16(16) | 9(9)   | 11(11) | 14(14) | 8(8)   | 11(11) | 32% | 17% | 23% | KRY54333.1 |
| putative arginine kinase F46H5.3                                          | - | A | A | 45915  | -   | 403 | 503 | -      | 12(12) | 12(12) | -      | 10(10) | 10(10) | -   | 32% | 33% | KRY58392.1 |
|                                                                           | - | B | B |        | -   | 110 | 146 | -      | 1(1)   | 2(2)   | -      | 1(1)   | 2(2)   | -   | 3%  | 7%  |            |
|                                                                           | C | C | - |        | 158 | 90  | -   | 3(3)   | 3(3)   | -      | 3(3)   | 3(3)   | -      | 10% | 9%  | -   |            |
|                                                                           | D | D | D |        | 135 | 136 | 75  | 3(3)   | 3(3)   | 1(1)   | 3(3)   | 3(3)   | 1(1)   | 9%  | 9%  | 3%  |            |
|                                                                           | - | - | E |        | -   | -   | 138 | -      | -      | 3(3)   | -      | -      | 3(3)   | -   | -   | 10% |            |
|                                                                           | - | - | F |        | -   | -   | 94  | -      | -      | 2(2)   | -      | -      | 2(2)   | -   | -   | 6%  |            |
|                                                                           | - | - | G |        | -   | -   | 89  | -      | -      | 4(2)   | -      | -      | 4(2)   | -   | -   | 11% |            |
| putative aspartate aminotransferase, cytoplasmic                          | A | - | A | 205821 | 81  | -   | 70  | 1(1)   | -      | 1(1)   | 1(1)   | -      | 1(1)   | 1%  | -   | 1%  | KRY48097.1 |
| putative delta-1-pyrroline-5-carboxylate synthase, partial                | D | - | - | 86241  | 62  | -   | -   | 1(1)   | -      | -      | 1(1)   | -      | -      | 1%  | -   | -   | KRY49148.1 |
| putative glutamine--tRNA ligase, partial                                  | C | C | C | 207108 | 164 | 164 | 91  | 3(3)   | 6(6)   | 3(3)   | 3(3)   | 6(6)   | 3(3)   | 2%  | 3%  | 1%  | KRY57355.1 |
| putative glycogen [starch] synthase                                       | D | - | - | 79600  | 94  | -   | -   | 3(3)   | -      | -      | 3(3)   | -      | -      | 4%  | -   | -   | KRY59075.1 |
| putative histone-binding protein Caf1                                     | B | B | B | 50720  | 106 | 75  | 101 | 3(3)   | 2(2)   | 2(2)   | 3(3)   | 2(2)   | 2(2)   | 6%  | 4%  | 5%  | KRY53239.1 |
| putative integrin beta-like protein                                       | A | A | A | 59305  | 259 | 122 | 169 | 4(4)   | 1(1)   | 4(4)   | 4(4)   | 1(1)   | 4(4)   | 13% | 4%  | 11% | KRY46033.1 |
|                                                                           | - | B | B |        | -   | 207 | 222 | -      | 3(3)   | 6(6)   | -      | 3(3)   | 6(6)   | -   | 9%  | 20% |            |
| putative mannosyl-oligosaccharide glucosidase                             | D | D | D | 95127  | 273 | 158 | 105 | 7(7)   | 4(4)   | 3(3)   | 7(7)   | 4(4)   | 3(3)   | 11% | 6%  | 4%  | KRY53241.1 |
| putative oxidoreductase -like protein                                     | A | A | A | 47000  | 78  | 76  | 81  | 1(1)   | 1(1)   | 1(1)   | 1(1)   | 1(1)   | 1(1)   | 2%  | 2%  | 2%  | KRY46863.1 |
| putative peptidyl-glycine alpha-amidating monooxygenase T19B4.1           | D | - | - | 46826  | 120 | -   | -   | 1(1)   | -      | -      | 1(1)   | -      | -      | 4%  | -   | -   | KRY57727.1 |
| putative phosphoglycerate kinase                                          | A | A | - | 62385  | 999 | 699 | -   | 28(27) | 25(23) | -      | 19(18) | 18(17) | -      | 45% | 41% | -   | KRY46312.1 |
|                                                                           | - | - | B |        | -   | -   | 171 | -      | -      | 5(5)   | -      | -      | 5(5)   | -   | -   | 12% |            |
|                                                                           | C | - | - | 62151  | 135 | -   | -   | 2(2)   | -      | -      | 2(2)   | -      | -      | 4%  | -   | -   | KRY46311.1 |
|                                                                           | B | B | - |        | 80  | 75  | -   | 2(2)   | 1(1)   | -      | 2(2)   | 1(1)   | -      | 4%  | 1%  | -   |            |
|                                                                           | - | - | C |        | -   | -   | 136 | -      | -      | 2(2)   | -      | -      | 2(2)   | -   | -   | 4%  |            |
|                                                                           | D | D | - |        | 134 | 107 | -   | 3(3)   | 3(3)   | -      | 3(3)   | 3(3)   | -      | 8%  | 7%  | -   |            |
|                                                                           | - | - | E |        | -   | -   | 119 | -      | -      | 2(2)   | -      | -      | 2(2)   | -   | -   | 4%  |            |
|                                                                           | - | - | F |        | -   | -   | 73  | -      | -      | 1(1)   | -      | -      | 1(1)   | -   | -   | 1%  |            |
| putative phospholipase B-like 2, partial                                  | A | A | A | 65395  | 81  | 66  | 63  | 2(2)   | 1(1)   | 1(1)   | 2(2)   | 1(1)   | 1(1)   | 3%  | 1%  | 1%  | KRY61331.1 |
| putative pterin-4-alpha-carbinolamine dehydratase                         | C | C | - | 130533 | 85  | 73  | -   | 2(2)   | 1(1)   | -      | 2(2)   | 1(1)   | -      | 1%  | 1%  | -   | KRY58441.1 |
| putative pyruvate dehydrogenase E1 component subunit alpha, mitochondrial | A | A | A | 49940  | 172 | 161 | 267 | 5(5)   | 4(4)   | 6(6)   | 5(5)   | 4(4)   | 6(6)   | 15% | 10% | 18% | KRY58181.1 |
|                                                                           | C | C | - |        | 76  | 115 | -   | 1(1)   | 1(1)   | -      | 1(1)   | 1(1)   | -      | 2%  | 2%  | -   |            |
|                                                                           | D | D | - |        | 93  | 83  | -   | 2(2)   | 2(2)   | -      | 2(2)   | 2(2)   | -      | 5%  | 4%  | -   |            |
| putative sodium/potassium-transporting ATPase subunit beta-3              | A | A | - | 35639  | 79  | 81  | -   | 1(1)   | 1(1)   | -      | 1(1)   | 1(1)   | -      | 3%  | 3%  | -   | KRY55118.1 |
|                                                                           | B | B | B |        | 80  | 79  | 69  | 1(1)   | 1(1)   | 1(1)   | 1(1)   | 1(1)   | 1(1)   | 3%  | 3%  | 3%  |            |
|                                                                           | - | C | - |        | -   | 77  | -   | -      | 1(1)   | -      | -      | 1(1)   | -      | -   | 3%  | -   |            |
| putative splicing factor, arginine/serine-rich 7, partial                 | - | A | A | 137028 | -   | 64  | 64  | -      | 1(0)   | 1(1)   | -      | 1(0)   | 1(1)   | -   | 1%  | 0%  | KRY51241.1 |
|                                                                           | - | - | B |        | -   | -   | 65  | -      | -      | 1(1)   | -      | -      | 1(1)   | -   | -   | 1%  |            |
|                                                                           | C | - | C |        | 70  | -   | 63  | 1(1)   | -      | 1(1)   | 1(1)   | -      | 1(1)   | 1%  | -   | 1%  |            |
|                                                                           | - | D | - |        | -   | 64  | -   | -      | 1(1)   | -      | -      | 1(1)   | -      | -   | 1%  | -   |            |
|                                                                           | - | - | E |        | -   | -   | 69  | -      | -      | 1(1)   | -      | -      | 1(1)   | -   | -   | 1%  |            |
|                                                                           | - | - | G |        | -   | -   | 71  | -      | -      | 1(1)   | -      | -      | 1(1)   | -   | -   | 1%  |            |
| putative tRNA (uracil-O(2)-)-methyltransferase, partial                   | - | C | - | 72192  | -   | 63  | -   | -      | 1(1)   | -      | -      | 1(1)   | -      | -   | 1%  | -   | KRY57299.1 |
| putative UDP-glucuronosyltransferase ugt-58                               | - | C | - | 63880  | -   | 77  | -   | -      | 2(2)   | -      | -      | 2(2)   | -      | -   | 4%  | -   | KRY54469.1 |
| Pyruvate carboxylase 1                                                    | - | - | E | 129873 | -   | -   | 145 | -      | -      | 3(3)   | -      | -      | 3(3)   | -   | -   | 3%  | KRY49943.1 |
| Pyruvate dehydrogenase E1 component subunit beta, mitochondrial           | C | - | - | 75458  | 103 | -   | -   | 1(1)   | -      | -      | 1(1)   | -      | -      | 2%  | -   | -   | KRY57570.1 |
|                                                                           | - | D | - |        | -   | 65  | -   | -      | 1(1)   | -      | -      | 1(1)   | -      | -   | 1%  | -   |            |
| Pyruvate kinase PKLR                                                      | - | - | C | 69929  | -   | -   | 170 | -      | -      | 2(2)   | -      | -      | 2(2)   | -   | -   | 5%  | KRY57523.1 |
| Pyruvate kinase PKM                                                       | - | - | C | 65506  | -   | -   | 170 | -      | -      | 2(2)   | -      | -      | 2(2)   | -   | -   | 5%  | KRY57524.1 |
| Rab GDP dissociation inhibitor alpha                                      | A | A | A | 50324  | 262 | 253 | 325 | 6(6)   | 6(6)   | 8(8)   | 6(6)   | 6(6)   | 7(7)   | 18% | 12% | 20% | KRY54650.1 |

|                                                                                          |   |   |   |        |      |     |      |        |        |        |        |        |        |     |     |     |            |
|------------------------------------------------------------------------------------------|---|---|---|--------|------|-----|------|--------|--------|--------|--------|--------|--------|-----|-----|-----|------------|
|                                                                                          | B | B | B |        | 727  | 930 | 766  | 19(19) | 24(23) | 22(22) | 13(13) | 15(14) | 16(16) | 39% | 45% | 47% |            |
| Rab proteins geranylgeranyltransferase component A                                       | C | C | - | 63173  | 173  | 92  | -    | 2(2)   | 1(1)   | -      | 2(2)   | 1(1)   | -      | 6%  | 3%  | -   | KRY47219.1 |
| Ran GTPase-activating protein 1, partial                                                 | C | C | C | 66199  | 275  | 258 | 205  | 7(7)   | 7(7)   | 6(6)   | 6(6)   | 7(7)   | 6(6)   | 11% | 12% | 11% | KRY60944.1 |
| RANBP2-like and GRIP domain-containing protein 5/6, partial                              | - | - | G | 112852 | -    | -   | 88   | -      | -      | 1(1)   | -      | -      | 1(1)   | -   | -   | 1%  | KRY49040.1 |
| Regulator of chromosome condensation                                                     | - | - | B | 74425  | -    | -   | 69   | -      | -      | 1(1)   | -      | -      | 1(1)   | -   | -   | 1%  | KRY55803.1 |
| Replicase polypeptide 1a                                                                 | A | - | A | 82573  | 77   | -   | 94   | 1(1)   | -      | 1(1)   | 1(1)   | -      | 1(1)   | 1%  | -   | 1%  | KRY55933.1 |
|                                                                                          | - | - | B |        | -    | -   | 77   | -      | -      | 1(1)   | -      | -      | 1(1)   | -   | -   | 1%  |            |
| Rho GTPase-activating protein 39                                                         | - | B | - | 229114 | -    | 126 | -    | -      | 2(2)   | -      | -      | 2(2)   | -      | -   | 1%  | -   | KRY55506.1 |
| RNA-binding protein squid                                                                | - | A | A | 38365  | -    | 89  | 105  | -      | 1(1)   | 1(1)   | -      | 1(1)   | 1(1)   | -   | 4%  | 4%  | KRY50692.1 |
| RWD domain-containing protein 2B                                                         | A | - | - | 79837  | 88   | -   | -    | 1(1)   | -      | -      | 1(1)   | -      | -      | 1%  | -   | -   | KRY47777.1 |
|                                                                                          | B | B | B |        | 71   | 116 | 133  | 1(1)   | 2(2)   | 2(2)   | 1(1)   | 2(2)   | 2(2)   | 1%  | 3%  | 3%  |            |
|                                                                                          | D | D | D |        | 156  | 74  | 94   | 4(4)   | 1(1)   | 2(2)   | 4(4)   | 1(1)   | 2(2)   | 3%  | 2%  | 3%  |            |
|                                                                                          | - | - | E |        | -    | -   | 147  | -      | -      | 3(3)   | -      | -      | 3(3)   | -   | -   | 6%  |            |
|                                                                                          | - | - | F |        | -    | -   | 65   | -      | -      | 1(1)   | -      | -      | 1(1)   | -   | -   | 2%  |            |
|                                                                                          | - | - | G |        | -    | -   | 82   | -      | -      | 1(1)   | -      | -      | 1(1)   | -   | -   | 1%  |            |
| S1 RNA-binding domain-containing protein 1, partial                                      | - | D | - | 121011 | -    | 62  | -    | -      | 1(1)   | -      | -      | 1(1)   | -      | -   | 0%  | -   | KRY57178.1 |
| secretion antigen precursor                                                              | A | - | - | 46673  | 88   | -   | -    | 1(1)   | -      | -      | 1(1)   | -      | -      | 2%  | -   | -   | CAD86782.1 |
|                                                                                          | B | B | B |        | 71   | 116 | 133  | 1(1)   | 2(2)   | 2(2)   | 1(1)   | 2(2)   | 2(2)   | 2%  | 5%  | 5%  |            |
|                                                                                          | C | C | C |        | 1200 | 939 | 735  | 33(33) | 25(24) | 20(20) | 16(16) | 11(10) | 13(13) | 39% | 35% | 32% |            |
|                                                                                          | D | D | D |        | 156  | 74  | 94   | 4(4)   | 1(1)   | 2(2)   | 3(3)   | 1(1)   | 2(2)   | 6%  | 3%  | 5%  |            |
|                                                                                          | - | - | E |        | -    | -   | 147  | -      | -      | 3(3)   | -      | -      | 3(3)   | -   | -   | 10% |            |
|                                                                                          | - | - | F |        | -    | -   | 65   | -      | -      | 1(1)   | -      | -      | 1(1)   | -   | -   | 3%  |            |
| Serine hydroxymethyltransferase                                                          | - | - | G |        | -    | -   | 82   | -      | -      | 1(1)   | -      | -      | 1(1)   | -   | -   | 2%  |            |
|                                                                                          | B | B | - | 33657  | 122  | 130 | -    | 1(1)   | 1(1)   | -      | 1(1)   | 1(1)   | -      | 4%  | 4%  | -   | KRY56265.1 |
|                                                                                          | - | - | E |        | -    | -   | 112  | -      | -      | 1(1)   | -      | -      | 1(1)   | -   | -   | 4%  |            |
| Serine protease 30                                                                       | - | - | G |        | -    | -   | 91   | -      | -      | 1(1)   | -      | -      | 1(1)   | -   | -   | 4%  |            |
|                                                                                          | A | A | A | 146279 | 695  | 228 | 522  | 11(10) | 4(4)   | 8(7)   | 6(5)   | 4(4)   | 5(4)   | 7%  | 5%  | 8%  | KRY58841.1 |
|                                                                                          | B | B | B |        | 697  | 919 | 930  | 13(13) | 15(15) | 15(15) | 6(6)   | 6(6)   | 7(7)   | 6%  | 7%  | 8%  |            |
|                                                                                          | C | C | C |        | 1561 | 876 | 1129 | 29(29) | 14(14) | 19(19) | 7(7)   | 7(7)   | 7(7)   | 8%  | 10% | 7%  |            |
|                                                                                          | D | D | D |        | 531  | 253 | 150  | 7(7)   | 5(5)   | 3(3)   | 5(5)   | 5(5)   | 2(2)   | 6%  | 5%  | 2%  |            |
|                                                                                          | - | - | E |        | -    | -   | 246  | -      | -      | 5(5)   | -      | -      | 4(4)   | -   | -   | 4%  |            |
|                                                                                          | - | - | F |        | -    | -   | 71   | -      | -      | 1(1)   | -      | -      | 1(1)   | -   | -   | 1%  |            |
|                                                                                          | - | - | G |        | -    | -   | 77   | -      | -      | 1(1)   | -      | -      | 1(1)   | -   | -   | 0%  |            |
| Serine/threonine-protein kinase mig-15                                                   | D | D | - | 236043 | 257  | 133 | -    | 5(5)   | 2(2)   | -      | 5(5)   | 2(2)   | -      | 4%  | 1%  | -   | KRY51313.1 |
| Serine/threonine-protein phosphatase 2A 56 kDa regulatory subunit delta isoform, partial | - | C | - | 73972  | -    | 82  | -    | -      | 1(1)   | -      | -      | 1(1)   | -      | -   | 2%  | -   | KRY60738.1 |
| Serine/threonine-protein phosphatase 2A 65 kDa regulatory subunit A alpha isoform        | - | - | B | 72963  | -    | -   | 107  | -      | -      | 1(1)   | -      | -      | 1(1)   | -   | -   | 2%  | KRY51863.1 |
|                                                                                          | - | D | - |        | -    | 130 | -    | -      | 2(2)   | -      | -      | 2(2)   | -      | -   | 5%  | -   |            |
|                                                                                          | - | - | E |        | -    | -   | 115  | -      | -      | 1(1)   | -      | -      | 1(1)   | -   | -   | 2%  |            |
|                                                                                          | - | - | F |        | -    | -   | 93   | -      | -      | 1(1)   | -      | -      | 1(1)   | -   | -   | 2%  |            |
| Serine/threonine-protein phosphatase 2B catalytic subunit 2                              | - | - | B | 55902  | -    | -   | 76   | -      | -      | 1(1)   | -      | -      | 1(1)   | -   | -   | 2%  | KRY57383.1 |
| Serine/threonine-protein phosphatase PP1                                                 | - | - | B | 36096  | -    | -   | 76   | -      | -      | 1(1)   | -      | -      | 1(1)   | -   | -   | 3%  | KRY53483.1 |
| Serine--tRNA ligase, cytoplasmic                                                         | B | B | B | 204653 | 78   | 145 | 151  | 1(1)   | 3(3)   | 2(2)   | 1(1)   | 3(3)   | 2(2)   | 0%  | 2%  | 2%  | KRY54661.1 |
|                                                                                          | - | C | - |        | -    | 100 | -    | -      | 1(1)   | -      | -      | 1(1)   | -      | -   | 0%  | -   |            |
| Serrate RNA effector molecule -like protein                                              | D | - | - | 104611 | 112  | -   | -    | 3(3)   | -      | -      | 3(3)   | -      | -      | 3%  | -   | -   | KRY49278.1 |
| Signal recognition particle receptor subunit alpha -like protein                         | - | B | B | 73535  | -    | 83  | 101  | -      | 1(1)   | 1(1)   | -      | 1(1)   | 1(1)   | -   | 1%  | 1%  | KRY60530.1 |
| Signal recognition particle subunit SRP72                                                | C | - | C | 76023  | 65   | -   | 78   | 1(1)   | -      | 1(1)   | 1(1)   | -      | 1(1)   | 1%  | -   | 1%  | KRY48637.1 |

|                                                                   |   |   |   |        |      |     |      |        |        |        |        |        |        |     |     |     |            |
|-------------------------------------------------------------------|---|---|---|--------|------|-----|------|--------|--------|--------|--------|--------|--------|-----|-----|-----|------------|
| Snake venom 5'-nucleotidase                                       | B | - | - | 183199 | 112  | -   | -    | 2(2)   | -      | -      | 2(2)   | -      | -      | 2%  | -   | -   | KRY49427.1 |
|                                                                   | C | C | C |        | 1377 | 911 | 924  | 36(36) | 26(24) | 23(23) | 18(18) | 15(15) | 16(16) | 13% | 12% | 10% |            |
|                                                                   | D | D | - |        | 60   | 155 | -    | 1(1)   | 2(2)   | -      | 1(1)   | 2(2)   | -      | 1%  | 1%  | -   |            |
|                                                                   | - | - | E |        | -    | -   | 124  | -      | -      | 2(2)   | -      | -      | 2(2)   | -   | -   | 1%  |            |
|                                                                   | - | - | F |        | -    | -   | 63   | -      | -      | 1(0)   | -      | -      | 1(0)   | -   | -   | 0%  |            |
|                                                                   | - | - | G |        | -    | -   | 98   | -      | -      | 1(1)   | -      | -      | 1(1)   | -   | -   | 0%  |            |
| Sodium/calcium exchanger 1, partial                               | D | D | - | 93898  | 143  | 67  | -    | 2(2)   | 1(1)   | -      | 2(2)   | 1(1)   | -      | 3%  | 1%  | -   | KRY49530.1 |
| Sodium/potassium-transporting ATPase subunit alpha                | C | - | - | 115783 | 93   | -   | -    | 1(1)   | -      | -      | 1(1)   | -      | -      | 1%  | -   | -   | KRY48181.1 |
|                                                                   | D | D | D |        | 249  | 309 | 113  | 7(7)   | 8(8)   | 2(2)   | 7(7)   | 8(8)   | 2(2)   | 8%  | 9%  | 2%  |            |
|                                                                   | - | - | E |        | -    | -   | 202  | -      | -      | 6(6)   | -      | -      | 6(6)   | -   | -   | 8%  |            |
|                                                                   | - | - | F |        | -    | -   | 180  | -      | -      | 5(4)   | -      | -      | 5(4)   | -   | -   | 6%  |            |
|                                                                   | - | - | G |        | -    | -   | 184  | -      | -      | 5(5)   | -      | -      | 5(5)   | -   | -   | 6%  |            |
| Solute carrier family 2, facilitated glucose transporter member 3 | A | A | A | 167928 | 100  | 72  | 141  | 1(1)   | 1(1)   | 2(2)   | 1(1)   | 1(1)   | 2(2)   | 0%  | 0%  | 1%  | KRY47169.1 |
|                                                                   | B | B | B |        | 182  | 165 | 159  | 3(3)   | 3(3)   | 2(2)   | 3(3)   | 3(3)   | 2(2)   | 2%  | 2%  | 1%  |            |
|                                                                   | - | C | - |        | -    | 60  | -    | -      | 1(1)   | -      | -      | 1(1)   | -      | -   | 0%  | -   |            |
|                                                                   | D | D | - |        | 81   | 78  | -    | 1(1)   | 1(1)   | -      | 1(1)   | 1(1)   | -      | 0%  | 0%  | -   |            |
|                                                                   | - | - | E |        | -    | -   | 127  | -      | -      | 2(2)   | -      | -      | 2(2)   | -   | -   | 1%  |            |
|                                                                   | - | - | F |        | -    | -   | 73   | -      | -      | 1(1)   | -      | -      | 1(1)   | -   | -   | 0%  |            |
|                                                                   | - | - | G |        | -    | -   | 135  | -      | -      | 2(2)   | -      | -      | 2(2)   | -   | -   | 1%  |            |
| Solute carrier family 35 member F6                                | - | - | E | 42929  | -    | -   | 78   | -      | -      | 1(1)   | -      | -      | 1(1)   | -   | -   | 2%  | KRY61494.1 |
|                                                                   | - | - | G |        | -    | -   | 79   | -      | -      | 1(1)   | -      | -      | 1(1)   | -   | -   | 2%  |            |
| Sorting nexin 1st-4                                               | - | - | C | 78100  | -    | -   | 69   | -      | -      | 1(1)   | -      | -      | 1(1)   | -   | -   | 1%  | KRY54778.1 |
| Spectrin alpha chain                                              | C | C | C | 326074 | 131  | 62  | 86   | 2(2)   | 1(1)   | 1(1)   | 2(2)   | 1(1)   | 1(1)   | 1%  | 0%  | 0%  | KRY60692.1 |
|                                                                   | D | D | D |        | 449  | 342 | 105  | 14(14) | 15(14) | 6(6)   | 13(13) | 14(13) | 6(6)   | 6%  | 5%  | 2%  |            |
|                                                                   | - | - | E |        | -    | -   | 725  | -      | -      | 35(35) | -      | -      | 33(33) | -   | -   | 12% |            |
|                                                                   | - | - | F |        | -    | -   | 589  | -      | -      | 28(27) | -      | -      | 26(26) | -   | -   | 10% |            |
|                                                                   | - | - | G |        | -    | -   | 1111 | -      | -      | 46(45) | -      | -      | 42(41) | -   | -   | 17% |            |
| Spectrin beta chain                                               | C | C | - | 270460 | 139  | 87  | -    | 2(2)   | 1(1)   | -      | 2(2)   | 1(1)   | -      | 1%  | 0%  | -   | KRY58047.1 |
|                                                                   | D | D | D |        | 604  | 548 | 181  | 17(17) | 19(17) | 6(6)   | 16(16) | 19(17) | 6(6)   | 9%  | 8%  | 3%  |            |
|                                                                   | - | - | E |        | -    | -   | 525  | -      | -      | 18(18) | -      | -      | 18(18) | -   | -   | 9%  |            |
|                                                                   | - | - | F |        | -    | -   | 499  | -      | -      | 22(21) | -      | -      | 19(19) | -   | -   | 9%  |            |
|                                                                   | - | - | G |        | -    | -   | 653  | -      | -      | 25(24) | -      | -      | 24(23) | -   | -   | 11% |            |
| Spliceosome RNA helicase DDX39B                                   | - | - | A | 83161  | -    | -   | 68   | -      | -      | 1(1)   | -      | -      | 1(1)   | -   | -   | 1%  | KRY50703.1 |
|                                                                   | B | - | B |        | 80   | -   | 218  | 2(2)   | -      | 5(5)   | 2(2)   | -      | 5(5)   | 2%  | -   | 8%  |            |
|                                                                   | - | C | C |        | -    | 80  | 85   | -      | 1(1)   | 1(1)   | -      | 1(1)   | 1(1)   | -   | 1%  | 1%  |            |
|                                                                   | - | D | - |        | -    | 79  | -    | -      | 1(1)   | -      | -      | 1(1)   | -      | -   | 1%  | -   |            |
| Splicing factor 3A subunit 1, partial                             | - | B | - | 116221 | -    | 84  | -    | -      | 1(1)   | -      | -      | 1(1)   | -      | -   | 1%  | -   | KRY50075.1 |
|                                                                   | D | - | - |        | 66   | -   | -    | 1(1)   | -      | -      | 1(1)   | -      | -      | 0%  | -   | -   |            |
| Splicing factor 3A subunit 3                                      | C | C | C | 58548  | 208  | 115 | 108  | 3(3)   | 3(3)   | 1(1)   | 3(3)   | 3(3)   | 1(1)   | 9%  | 7%  | 2%  | KRY56136.1 |
| Splicing factor 3B subunit 3                                      | - | - | E | 137455 | -    | -   | 152  | -      | -      | 3(3)   | -      | -      | 3(3)   | -   | -   | 2%  | KRY50462.1 |
| Squamous cell carcinoma antigen recognized by T-cells 3           | A | - | - | 143419 | 109  | -   | -    | 1(1)   | -      | -      | 1(1)   | -      | -      | 1%  | -   | -   | KRY55648.1 |
|                                                                   | D | - | - |        | 116  | -   | -    | 1(1)   | -      | -      | 1(1)   | -      | -      | 1%  | -   | -   |            |
| Stress-70 protein, mitochondrial                                  | A | A | A | 92371  | 60   | 63  | 72   | 1(1)   | 1(0)   | 1(1)   | 1(1)   | 1(0)   | 1(1)   | 1%  | 1%  | 1%  | KRY58424.1 |
|                                                                   | C | C | C |        | 154  | 164 | 127  | 6(5)   | 4(4)   | 4(4)   | 6(5)   | 4(4)   | 4(4)   | 7%  | 5%  | 5%  |            |
|                                                                   | D | D | - |        | 112  | 104 | -    | 2(2)   | 2(2)   | -      | 2(2)   | 2(2)   | -      | 3%  | 2%  | -   |            |
|                                                                   | - | - | E |        | -    | -   | 101  | -      | -      | 2(2)   | -      | -      | 2(2)   | -   | -   | 3%  |            |
|                                                                   | - | - | G |        | -    | -   | 93   | -      | -      | 1(1)   | -      | -      | 1(1)   | -   | -   | 1%  |            |
| Stress-induced-phosphoprotein 1                                   | A | A | A | 59744  | 89   | 110 | 68   | 1(1)   | 2(2)   | 1(1)   | 1(1)   | 2(2)   | 1(1)   | 2%  | 5%  | 2%  | KRY50816.1 |
|                                                                   | C | C | C |        | 766  | 591 | 982  | 24(24) | 23(21) | 32(31) | 22(22) | 18(16) | 20(19) | 45% | 39% | 42% |            |

|                                                                          |   |   |   |        |     |     |     |        |        |        |        |        |        |     |     |     |            |
|--------------------------------------------------------------------------|---|---|---|--------|-----|-----|-----|--------|--------|--------|--------|--------|--------|-----|-----|-----|------------|
| Structural maintenance of chromosomes protein 3                          | B | B | B | 180414 | 125 | 99  | 148 | 3(3)   | 2(2)   | 5(5)   | 3(3)   | 2(2)   | 4(4)   | 1%  | 1%  | 3%  | KRY53012.1 |
| Succinate dehydrogenase [ubiquinone] flavoprotein subunit, mitochondrial | C | C | C | 72418  | 677 | 534 | 669 | 21(21) | 18(17) | 16(15) | 17(17) | 14(13) | 12(11) | 33% | 25% | 23% | KRY54543.1 |
| Succinate dehydrogenase [ubiquinone] iron-sulfur subunit, mitochondrial  | D | - | - | 80501  | 87  | -   | -   | 1(1)   | -      | -      | 1(1)   | -      | -      | 1%  | -   | -   | KRY59439.1 |
|                                                                          | - | - | E |        | -   | -   | 72  | -      | -      | 1(1)   | -      | -      | 1(1)   | -   | -   | 2%  |            |
| Succinate-semialdehyde dehydrogenase, mitochondrial                      | B | B | B | 63166  | 152 | 163 | 251 | 5(5)   | 6(6)   | 7(7)   | 5(5)   | 6(6)   | 7(7)   | 10% | 11% | 14% | KRY54971.1 |
|                                                                          | D | D | - |        | 79  | 76  | -   | 1(1)   | 2(2)   | -      | 1(1)   | 2(2)   | -      | 2%  | 4%  | -   |            |
| Sucrase-isomaltase, intestinal, partial                                  | - | - | E | 110992 | -   | -   | 165 | -      | -      | 5(4)   | -      | -      | 5(4)   | -   | -   | 6%  | KRY53086.1 |
| Sulfhydryl oxidase 1                                                     | C | C | C | 109353 | 446 | 372 | 231 | 11(11) | 9(9)   | 7(7)   | 8(8)   | 7(7)   | 6(6)   | 10% | 10% | 9%  | KRY58937.1 |
| Sulfide:quinone oxidoreductase, mitochondrial                            | A | A | A | 54403  | 185 | 64  | 112 | 5(5)   | 1(1)   | 3(3)   | 5(5)   | 1(1)   | 3(3)   | 14% | 2%  | 6%  | KRY46292.1 |
|                                                                          | - | B | B |        | -   | 80  | 65  | -      | 1(1)   | 1(1)   | -      | 1(1)   | 1(1)   | -   | 2%  | 2%  |            |
|                                                                          | - | C | - |        | -   | 83  | -   | -      | 1(1)   | -      | -      | 1(1)   | -      | -   | 2%  | -   |            |
|                                                                          | D | D | - |        | 64  | 81  | -   | 1(1)   | 2(2)   | -      | 1(1)   | 2(2)   | -      | 2%  | 5%  | -   |            |
| Talin-1                                                                  | D | - | - | 282559 | 71  | -   | -   | 1(1)   | -      | -      | 1(1)   | -      | -      | 0%  | -   | -   | KRY54739.1 |
| TBC1 domain family member 15, partial                                    | - | C | - | 78010  | -   | 111 | -   | -      | 1(1)   | -      | -      | 1(1)   | -      | -   | 1%  | -   | KRY52268.1 |
| T-complex protein 1 subunit alpha                                        | - | A | - | 79972  | -   | 71  | -   | -      | 1(1)   | -      | -      | 1(1)   | -      | -   | 1%  | -   | KRY49588.1 |
|                                                                          | C | C | C |        | 266 | 95  | 136 | 6(6)   | 2(2)   | 4(4)   | 6(6)   | 2(2)   | 4(4)   | 9%  | 2%  | 6%  |            |
|                                                                          | - | D | - |        | -   | 73  | -   | -      | 1(1)   | -      | -      | 1(1)   | -      | -   | 1%  | -   |            |
|                                                                          | - | - | E |        | -   | -   | 142 | -      | -      | 3(3)   | -      | -      | 3(3)   | -   | -   | 5%  |            |
|                                                                          | - | - | G |        | -   | -   | 74  | -      | -      | 1(1)   | -      | -      | 1(1)   | -   | -   | 1%  |            |
| T-complex protein 1 subunit beta                                         | - | - | A | 59807  | -   | -   | 62  | -      | -      | 1(1)   | -      | -      | 1(1)   | -   | -   | 2%  | KRY52365.1 |
|                                                                          | B | B | B |        | 138 | 116 | 113 | 2(2)   | 3(3)   | 2(2)   | 2(2)   | 3(3)   | 2(2)   | 5%  | 8%  | 4%  |            |
|                                                                          | C | C | C |        | 260 | 236 | 265 | 7(7)   | 5(5)   | 8(8)   | 7(7)   | 5(5)   | 8(8)   | 16% | 13% | 20% |            |
|                                                                          | D | D | D |        | 76  | 84  | 94  | 1(1)   | 1(1)   | 1(1)   | 1(1)   | 1(1)   | 1(1)   | 2%  | 2%  | 2%  |            |
|                                                                          | - | - | E |        | -   | -   | 107 | -      | -      | 1(1)   | -      | -      | 1(1)   | -   | -   | 2%  |            |
|                                                                          | - | - | F |        | -   | -   | 102 | -      | -      | 1(1)   | -      | -      | 1(1)   | -   | -   | 2%  |            |
| T-complex protein 1 subunit delta, partial                               | - | - | C | 25524  | -   | -   | 64  | -      | -      | 1(1)   | -      | -      | 1(1)   | -   | -   | 3%  | KRY50590.1 |
|                                                                          | - | - | E |        | -   | -   | 70  | -      | -      | 1(1)   | -      | -      | 1(1)   | -   | -   | 5%  |            |
|                                                                          | - | - | G |        | -   | -   | 69  | -      | -      | 1(1)   | -      | -      | 1(1)   | -   | -   | 5%  |            |
| T-complex protein 1 subunit epsilon                                      | - | - | B | 66843  | -   | -   | 74  | -      | -      | 1(1)   | -      | -      | 1(1)   | -   | -   | 1%  | KRY50385.1 |
|                                                                          | C | C | C |        | 595 | 503 | 322 | 17(17) | 16(16) | 11(11) | 16(16) | 14(14) | 7(7)   | 29% | 27% | 13% |            |
|                                                                          | - | - | E |        | -   | -   | 146 | -      | -      | 2(2)   | -      | -      | 2(2)   | -   | -   | 5%  |            |
|                                                                          | - | - | G |        | -   | -   | 77  | -      | -      | 2(2)   | -      | -      | 2(2)   | -   | -   | 5%  |            |
| T-complex protein 1 subunit eta                                          | - | A | A | 175156 | -   | 99  | 109 | -      | 1(1)   | 2(2)   | -      | 1(1)   | 2(2)   | -   | 0%  | 1%  | KRY48081.1 |
|                                                                          | - | B | B |        | -   | 96  | 70  | -      | 2(2)   | 1(1)   | -      | 2(2)   | 1(1)   | -   | 2%  | 0%  |            |
|                                                                          | C | C | - |        | 151 | 126 | -   | 3(3)   | 2(2)   | -      | 3(3)   | 2(2)   | -      | 2%  | 1%  | -   |            |
|                                                                          | D | D | - |        | 131 | 83  | -   | 1(1)   | 1(1)   | -      | 1(1)   | 1(1)   | -      | 0%  | 0%  | -   |            |
|                                                                          | - | - | F |        | -   | -   | 82  | -      | -      | 1(1)   | -      | -      | 1(1)   | -   | -   | 0%  |            |
|                                                                          | - | - | G |        | -   | -   | 83  | -      | -      | 1(1)   | -      | -      | 1(1)   | -   | -   | 0%  |            |
| T-complex protein 1 subunit gamma                                        | - | B | B | 60486  | -   | 99  | 142 | -      | 1(1)   | 2(2)   | -      | 1(1)   | 2(2)   | -   | 2%  | 5%  | KRY47292.1 |
|                                                                          | C | C | C |        | 647 | 427 | 436 | 16(16) | 14(12) | 9(9)   | 12(12) | 10(9)  | 7(7)   | 32% | 24% | 19% |            |
|                                                                          | D | - | - |        | 140 | -   | -   | 2(2)   | -      | -      | 2(2)   | -      | -      | 5%  | -   | -   |            |
|                                                                          | - | - | E |        | -   | -   | 64  | -      | -      | 1(1)   | -      | -      | 1(1)   | -   | -   | 1%  |            |
| T-complex protein 1 subunit theta                                        | - | - | A | 151283 | -   | -   | 119 | -      | -      | 1(1)   | -      | -      | 1(1)   | -   | -   | 1%  | KRY50910.1 |
|                                                                          | B | B | B |        | 149 | 128 | 75  | 4(4)   | 1(1)   | 2(2)   | 4(4)   | 1(1)   | 2(2)   | 3%  | 1%  | 1%  |            |
|                                                                          | C | C | C |        | 242 | 201 | 154 | 7(7)   | 7(7)   | 4(4)   | 7(7)   | 7(7)   | 4(4)   | 6%  | 6%  | 3%  |            |
|                                                                          | D | D | D |        | 242 | 214 | 86  | 6(6)   | 5(5)   | 1(1)   | 6(6)   | 5(5)   | 1(1)   | 5%  | 4%  | 1%  |            |
|                                                                          | - | - | E |        | -   | -   | 131 | -      | -      | 4(4)   | -      | -      | 4(4)   | -   | -   | 3%  |            |
|                                                                          | - | - | F |        | -   | -   | 173 | -      | -      | 4(4)   | -      | -      | 4(4)   | -   | -   | 3%  |            |

|                                                                |   |   |   |         |     |     |     |        |        |        |        |        |        |     |     |     |            |
|----------------------------------------------------------------|---|---|---|---------|-----|-----|-----|--------|--------|--------|--------|--------|--------|-----|-----|-----|------------|
|                                                                | - | - | G |         | -   | -   | 185 | -      | -      | 3(3)   | -      | -      | 3(3)   | -   | -   | 2%  |            |
| Tenascin-X                                                     | A | A | - | 43639   | 78  | 74  | -   | 2(2)   | 1(1)   | -      | 2(2)   | 1(1)   | -      | 6%  | 3%  | -   | KRY57379.1 |
| Teneurin-a                                                     | D | - | - | 161014  | 204 | -   | -   | 4(4)   | -      | -      | 4(4)   | -      | -      | 3%  | -   | -   | KRY46006.1 |
| Tetratricopeptide repeat protein 39B, partial                  | - | C | - | 67183   | -   | 76  | -   | -      | 1(1)   | -      | -      | 1(1)   | -      | -   | 1%  | -   | KRY50883.1 |
| Thioredoxin reductase 1, cytoplasmic, partial                  | D | D | - | 141583  | 67  | 68  | -   | 1(1)   | 1(1)   | -      | 1(1)   | 1(1)   | -      | 0%  | 0%  | -   | KRY57019.1 |
|                                                                | - | - | F |         | -   | -   | 71  | -      | -      | 1(1)   | -      | -      | 1(1)   | -   | -   | 0%  |            |
|                                                                | - | - | G |         | -   | -   | 87  | -      | -      | 1(1)   | -      | -      | 1(1)   | -   | -   | 0%  |            |
| TIP41-like protein, partial                                    | D | - | - | 251313  | 105 | -   | -   | 3(3)   | -      | -      | 3(3)   | -      | -      | 2%  | -   | -   | KRY48002.1 |
| Titin                                                          | - | - | B | 1732268 | -   | -   | 71  | -      | -      | 1(1)   | -      | -      | 1(1)   | -   | -   | 0%  | KRY55434.1 |
|                                                                | - | - | C |         | -   | -   | 69  | -      | -      | 1(1)   | -      | -      | 1(1)   | -   | -   | 0%  |            |
|                                                                | - | D | - |         | -   | 67  | -   | -      | 1(1)   | -      | -      | 1(1)   | -      | -   | 0%  | -   |            |
|                                                                | - | - | E |         | -   | -   | 123 | -      | -      | 5(5)   | -      | -      | 5(5)   | -   | -   | 0%  |            |
|                                                                | - | - | F |         | -   | -   | 88  | -      | -      | 3(3)   | -      | -      | 3(3)   | -   | -   | 0%  |            |
|                                                                | - | - | G |         | -   | -   | 92  | -      | -      | 2(2)   | -      | -      | 2(2)   | -   | -   | 0%  |            |
| TOM1-like protein 2                                            | - | - | A | 44804   | -   | -   | 103 | -      | -      | 1(1)   | -      | -      | 1(1)   | -   | -   | 3%  | KRY50457.1 |
|                                                                | - | B | B |         | -   | 112 | 89  | -      | 1(1)   | 1(1)   | -      | 1(1)   | 1(1)   | -   | 3%  | 2%  |            |
| Transforming growth factor-beta-induced protein ig-h3, partial | - | C | - | 82807   | -   | 98  | -   | -      | 2(2)   | -      | -      | 2(2)   | -      | -   | 3%  | -   | KRY46587.1 |
|                                                                | D | D | D |         | 586 | 369 | 169 | 23(22) | 19(16) | 6(6)   | 18(17) | 16(15) | 6(6)   | 27% | 23% | 8%  |            |
| Transketolase                                                  | C | C | C | 140272  | 685 | 486 | 530 | 19(19) | 16(15) | 19(18) | 16(16) | 13(12) | 17(16) | 13% | 11% | 14% | KRY48205.1 |
|                                                                | D | D | - |         | 97  | 79  | -   | 2(2)   | 1(1)   | -      | 2(2)   | 1(1)   | -      | 2%  | 0%  | -   |            |
|                                                                | - | - | E |         | -   | -   | 120 | -      | -      | 2(2)   | -      | -      | 2(2)   | -   | -   | 2%  |            |
|                                                                | - | - | F |         | -   | -   | 81  | -      | -      | 1(1)   | -      | -      | 1(1)   | -   | -   | 0%  |            |
|                                                                | - | - | G |         | -   | -   | 79  | -      | -      | 1(1)   | -      | -      | 1(1)   | -   | -   | 0%  |            |
| Transketolase-like protein 2                                   | - | - | E | 140714  | -   | -   | 120 | -      | -      | 2(2)   | -      | -      | 2(2)   | -   | -   | 2%  | KRY48207.1 |
|                                                                | - | - | F |         | -   | -   | 81  | -      | -      | 1(1)   | -      | -      | 1(1)   | -   | -   | 0%  |            |
|                                                                | - | - | G |         | -   | -   | 79  | -      | -      | 1(1)   | -      | -      | 1(1)   | -   | -   | 0%  |            |
| Transmembrane 9 superfamily member 4, partial                  | B | - | - | 75001   | 66  | -   | -   | 1(1)   | -      | -      | 1(1)   | -      | -      | 1%  | -   | -   | KRY58234.1 |
| Transmembrane protease serine 5                                | A | A | A | 41206   | 148 | 148 | 116 | 2(2)   | 4(4)   | 3(3)   | 2(2)   | 4(4)   | 3(3)   | 3%  | 11% | 9%  | KRY50806.1 |
| Transmembrane protease serine 9                                | - | A | A | 73208   | -   | 123 | 191 | -      | 1(1)   | 5(5)   | -      | 1(1)   | 5(5)   | -   | 2%  | 9%  | KRY59262.1 |
|                                                                | B | B | B |         | 65  | 185 | 156 | 1(1)   | 4(4)   | 3(3)   | 1(1)   | 3(3)   | 3(3)   | 1%  | 5%  | 5%  |            |
|                                                                | C | C | C |         | 654 | 495 | 593 | 17(16) | 13(13) | 16(16) | 15(14) | 9(9)   | 11(11) | 26% | 14% | 20% |            |
|                                                                | D | D | D |         | 156 | 149 | 126 | 6(5)   | 2(2)   | 2(2)   | 6(5)   | 2(2)   | 2(2)   | 11% | 4%  | 4%  |            |
|                                                                | - | - | E |         | -   | -   | 203 | -      | -      | 4(4)   | -      | -      | 4(4)   | -   | -   | 5%  |            |
|                                                                | - | - | F |         | -   | -   | 150 | -      | -      | 3(3)   | -      | -      | 3(3)   | -   | -   | 5%  |            |
|                                                                | - | - | G |         | -   | -   | 100 | -      | -      | 2(2)   | -      | -      | 2(2)   | -   | -   | 2%  |            |
| Trifunctional enzyme subunit alpha, mitochondrial, partial     | - | D | - | 87742   | -   | 61  | -   | -      | 1(1)   | -      | -      | 1(1)   | -      | -   | 1%  | -   | KRY46110.1 |
|                                                                | - | - | E |         | -   | -   | 71  | -      | -      | 1(1)   | -      | -      | 1(1)   | -   | -   | 1%  |            |
|                                                                | - | - | F |         | -   | -   | 69  | -      | -      | 1(1)   | -      | -      | 1(1)   | -   | -   | 1%  |            |
|                                                                | - | - | G | 85474   | -   | -   | 72  | -      | -      | 2(2)   | -      | -      | 2(2)   | -   | -   | 2%  | KRY50419.1 |
| Trifunctional enzyme subunit beta, mitochondrial               | A | A | A | 47839   | 102 | 118 | 114 | 2(2)   | 3(3)   | 4(4)   | 2(2)   | 3(3)   | 4(4)   | 5%  | 6%  | 8%  | KRY48050.1 |
|                                                                | - | - | E |         | -   | -   | 66  | -      | -      | 1(1)   | -      | -      | 1(1)   | -   | -   | 2%  |            |
| Tripeptidyl-peptidase 2                                        | - | - | D | 148415  | -   | -   | 76  | -      | -      | 1(1)   | -      | -      | 1(1)   | -   | -   | 0%  | KRY49250.1 |
|                                                                | - | - | E |         | -   | -   | 85  | -      | -      | 2(2)   | -      | -      | 2(2)   | -   | -   | 1%  |            |
|                                                                | - | - | F |         | -   | -   | 78  | -      | -      | 1(1)   | -      | -      | 1(1)   | -   | -   | 0%  |            |
| Tubulin alpha-3 chain                                          | A | A | A | 50924   | 169 | 130 | 114 | 3(3)   | 3(3)   | 3(3)   | 3(3)   | 3(3)   | 3(3)   | 9%  | 11% | 10% | KRY50534.1 |
|                                                                | B | B | B |         | 286 | 280 | 429 | 6(6)   | 6(6)   | 10(10) | 6(6)   | 5(5)   | 9(9)   | 20% | 16% | 28% |            |
|                                                                | C | C | C |         | 221 | 253 | 281 | 5(5)   | 7(7)   | 4(4)   | 5(5)   | 7(7)   | 4(4)   | 16% | 20% | 14% |            |
|                                                                | D | D | D |         | 324 | 208 | 73  | 6(6)   | 6(6)   | 1(1)   | 6(6)   | 6(6)   | 1(1)   | 23% | 18% | 4%  |            |
|                                                                | - | - | E |         | -   | -   | 156 | -      | -      | 4(4)   | -      | -      | 4(4)   | -   | -   | 13% |            |

|                                                            |   |   |   |        |     |     |     |        |      |        |      |      |        |     |     |     |            |
|------------------------------------------------------------|---|---|---|--------|-----|-----|-----|--------|------|--------|------|------|--------|-----|-----|-----|------------|
|                                                            | - | - | F |        | -   | -   | 82  | -      | -    | 2(2)   | -    | -    | 2(2)   | -   | -   | 6%  |            |
|                                                            | - | - | G |        | -   | -   | 92  | -      | -    | 3(3)   | -    | -    | 3(3)   | -   | -   | 8%  |            |
| Twitchin                                                   | - | D | - | 712509 | -   | 60  | -   | -      | 1(1) | -      | -    | 1(1) | -      | -   | 0%  | -   | KRY50893.1 |
|                                                            | - | - | E |        | -   | -   | 218 | -      | -    | 8(8)   | -    | -    | 8(8)   | -   | -   | 1%  |            |
|                                                            | - | - | F |        | -   | -   | 116 | -      | -    | 3(3)   | -    | -    | 3(3)   | -   | -   | 0%  |            |
|                                                            | - | - | G |        | -   | -   | 379 | -      | -    | 15(15) | -    | -    | 15(15) | -   | -   | 2%  |            |
|                                                            | - | - | - |        | -   | -   | -   | -      | -    | -      | -    | -    | -      | -   | -   | -   |            |
| Type I inositol 1,4,5-trisphosphate 5-phosphatase, partial | A | A | A | 57850  | 210 | 86  | 99  | 6(6)   | 1(1) | 2(2)   | 5(5) | 1(1) | 2(2)   | 14% | 2%  | 4%  | KRY50866.1 |
| U3 small nucleolar RNA-associated protein 15 -like protein | - | C | C | 103477 | -   | 60  | 61  | -      | 1(1) | 1(1)   | -    | 1(1) | 1(1)   | -   | 0%  | 0%  | KRY56987.1 |
| Ubiquitin carboxyl-terminal hydrolase 14, partial          | C | C | C | 57580  | 201 | 109 | 174 | 7(7)   | 3(2) | 6(6)   | 4(4) | 3(2) | 6(6)   | 10% | 7%  | 14% | KRY58645.1 |
|                                                            | - | - | E |        | -   | -   | 81  | -      | -    | 1(1)   | -    | -    | 1(1)   | -   | -   | 2%  |            |
| Ubiquitin carboxyl-terminal hydrolase 15                   | - | - | C | 155087 | -   | -   | 107 | -      | -    | 1(1)   | -    | -    | 1(1)   | -   | -   | 1%  | KRY54182.1 |
|                                                            | - | - | D |        | -   | -   | 161 | -      | -    | 4(4)   | -    | -    | 4(4)   | -   | -   | 4%  |            |
| Ubiquitin carboxyl-terminal hydrolase 4                    | - | - | C | 163219 | -   | -   | 107 | -      | -    | 1(1)   | -    | -    | 1(1)   | -   | -   | 1%  | KRY54180.1 |
|                                                            | - | - | D |        | -   | -   | 161 | -      | -    | 4(4)   | -    | -    | 4(4)   | -   | -   | 4%  |            |
| Ubiquitin carboxyl-terminal hydrolase 7, partial           | C | - | - | 127949 | 61  | -   | -   | 1(1)   | -    | -      | 1(1) | -    | -      | 1%  | -   | -   | KRY49807.1 |
|                                                            | - | D | - |        | -   | 104 | -   | -      | 2(2) | -      | -    | 2(2) | -      | -   | 2%  | -   |            |
|                                                            | - | - | E |        | -   | -   | 258 | -      | -    | 9(8)   | -    | -    | 9(8)   | -   | -   | 9%  |            |
| Ubiquitin-like modifier-activating enzyme 1                | D | D | D | 128939 | 221 | 221 | 105 | 4(4)   | 5(5) | 2(2)   | 4(4) | 5(5) | 2(2)   | 7%  | 6%  | 2%  | KRY59617.1 |
|                                                            | - | - | F |        | -   | -   | 153 | -      | -    | 2(2)   | -    | -    | 2(2)   | -   | -   | 2%  |            |
|                                                            | - | - | G |        | -   | -   | 166 | -      | -    | 4(4)   | -    | -    | 4(4)   | -   | -   | 4%  |            |
| Ubiquitin-like modifier-activating enzyme 5                | A | A | A | 41307  | 104 | 103 | 174 | 1(1)   | 1(1) | 2(2)   | 1(1) | 1(1) | 2(2)   | 4%  | 3%  | 7%  | KRY47667.1 |
| UBX domain-containing protein 7, partial                   | - | - | B | 53187  | -   | -   | 77  | -      | -    | 1(1)   | -    | -    | 1(1)   | -   | -   | 2%  | KRY58943.1 |
| UDP-glucose 4-epimerase                                    | A | - | - | 86965  | 100 | -   | -   | 1(1)   | -    | -      | 1(1) | -    | -      | 1%  | -   | -   | KRY59504.1 |
| UDP-glucose:glycoprotein glucosyltransferase 1             | D | - | - | 407891 | 76  | -   | -   | 1(1)   | -    | -      | 1(1) | -    | -      | 0%  | -   | -   | KRY46767.1 |
|                                                            | - | - | E |        | -   | -   | 107 | -      | -    | 5(4)   | -    | -    | 5(4)   | -   | -   | 0%  |            |
|                                                            | - | - | F |        | -   | -   | 147 | -      | -    | 3(3)   | -    | -    | 3(3)   | -   | -   | 1%  |            |
| UDP-N-acetylhexosamine pyrophosphorylase                   | - | - | A | 84084  | -   | -   | 62  | -      | -    | 1(1)   | -    | -    | 1(1)   | -   | -   | 1%  | KRY50795.1 |
|                                                            | - | - | B |        | -   | -   | 63  | -      | -    | 1(1)   | -    | -    | 1(1)   | -   | -   | 1%  |            |
|                                                            | - | - | C |        | -   | -   | 213 | -      | -    | 4(4)   | -    | -    | 4(4)   | -   | -   | 7%  |            |
| Ufm1-specific protease 2, partial                          | C | C | C | 72485  | 112 | 130 | 135 | 3(3)   | 4(4) | 3(3)   | 3(3) | 4(4) | 3(3)   | 7%  | 8%  | 6%  | KRY61155.1 |
| Uncharacterized protein T03_12349, partial                 | B | B | B | 51663  | 85  | 75  | 88  | 1(1)   | 1(1) | 1(1)   | 1(1) | 1(1) | 1(1)   | 2%  | 2%  | 2%  | KRY48646.1 |
| Uncharacterized protein T03_14872                          | D | - | - | 149786 | 61  | -   | -   | 1(1)   | -    | -      | 1(1) | -    | -      | 0%  | -   | -   | KRY46969.1 |
|                                                            | - | - | E |        | -   | -   | 165 | -      | -    | 5(5)   | -    | -    | 5(5)   | -   | -   | 4%  |            |
|                                                            | - | - | F |        | -   | -   | 227 | -      | -    | 10(10) | -    | -    | 10(10) | -   | -   | 8%  |            |
| Uncharacterized protein T03_8348, partial                  | C | C | C | 89811  | 58  | 76  | 96  | 1(1)   | 1(1) | 1(1)   | 1(1) | 1(1) | 1(1)   | 1%  | 1%  | 1%  | KRY58357.1 |
| Uncharacterized protein T03_9851                           | A | A | A | 42427  | 890 | 316 | 435 | 18(17) | 6(6) | 10(9)  | 6(5) | 4(4) | 6(5)   | 25% | 14% | 25% | KRY58607.1 |
|                                                            | B | B | B |        | 233 | 316 | 402 | 5(5)   | 5(5) | 8(8)   | 3(3) | 3(3) | 5(5)   | 14% | 14% | 23% |            |
|                                                            | - | - | D |        | -   | -   | 70  | -      | -    | 1(1)   | -    | -    | 1(1)   | -   | -   | 3%  |            |
|                                                            | - | - | E |        | -   | -   | 67  | -      | -    | 1(1)   | -    | -    | 1(1)   | -   | -   | 3%  |            |
| Uridine 5'-monophosphate synthase                          | B | - | B | 108908 | 75  | -   | 67  | 1(1)   | -    | 1(1)   | 1(1) | -    | 1(1)   | 1%  | -   | 1%  | KRY46591.1 |
| UTP--glucose-1-phosphate uridylyltransferase, partial      | - | A | - | 154987 | -   | 88  | -   | -      | 1(1) | -      | -    | 1(1) | -      | -   | 0%  | -   | KRY53918.1 |
|                                                            | B | - | B |        | 69  | -   | 75  | 1(1)   | -    | 1(1)   | 1(1) | -    | 1(1)   | 0%  | -   | 1%  |            |
|                                                            | - | - | E |        | -   | -   | 83  | -      | -    | 1(1)   | -    | -    | 1(1)   | -   | -   | 0%  |            |
|                                                            | - | - | G |        | -   | -   | 64  | -      | -    | 1(1)   | -    | -    | 1(1)   | -   | -   | 0%  |            |
| UV excision repair protein RAD23 -like protein B, partial  | A | A | A | 59386  | 64  | 67  | 66  | 1(1)   | 1(1) | 1(1)   | 1(1) | 1(1) | 1(1)   | 3%  | 1%  | 1%  | KRY52282.1 |
| Vacuolar protein sorting-associated protein 13A            | D | - | - | 374278 | 65  | -   | -   | 1(1)   | -    | -      | 1(1) | -    | -      | 0%  | -   | -   | KRY49720.1 |
|                                                            | - | - | E |        | -   | -   | 129 | -      | -    | 2(2)   | -    | -    | 2(2)   | -   | -   | 0%  |            |
|                                                            | - | - | G |        | -   | -   | 123 | -      | -    | 3(3)   | -    | -    | 3(3)   | -   | -   | 1%  |            |
| Vacuolar protein sorting-associated protein 13C            | D | - | - | 349964 | 65  | -   | -   | 1(1)   | -    | -      | 1(1) | -    | -      | 0%  | -   | -   | KRY49724.1 |



|                                                                         |   |   |   |        |     |     |     |        |      |        |        |      |        |     |     |    |            |
|-------------------------------------------------------------------------|---|---|---|--------|-----|-----|-----|--------|------|--------|--------|------|--------|-----|-----|----|------------|
|                                                                         | - | - | E |        | -   | -   | 129 | -      | -    | 2(2)   | -      | -    | 2(2)   | -   | -   | 0% |            |
| Vacuolar protein sorting-associated protein 26B                         | - | B | B | 215378 | -   | 64  | 61  | -      | 1(1) | 1(1)   | -      | 1(1) | 1(1)   | -   | 1%  | 0% | KRY53691.1 |
| Vacuolar protein sorting-associated protein 45                          | C | C | C | 152135 | 131 | 84  | 97  | 3(3)   | 1(1) | 2(2)   | 3(3)   | 1(1) | 2(2)   | 2%  | 1%  | 2% | KRY55299.1 |
| Valine--tRNA ligase                                                     | - | D | - | 120864 | -   | 80  | -   | -      | 1(1) | -      | -      | 1(1) | -      | -   | 0%  | -  | KRY54004.1 |
| Very long-chain specific acyl-CoA dehydrogenase, mitochondrial, partial | C | C | C | 70153  | 368 | 152 | 159 | 10(10) | 4(4) | 3(3)   | 10(10) | 4(4) | 3(3)   | 21% | 8%  | 6% | KRY52870.1 |
| Vigilin, partial                                                        | D | - | - | 156394 | 72  | -   | -   | 1(1)   | -    | -      | 1(1)   | -    | -      | 1%  | -   | -  | KRY57752.1 |
|                                                                         | - | - | G |        | -   | -   | 83  | -      | -    | 2(2)   | -      | -    | 2(2)   | -   | -   | 1% |            |
| Vinculin                                                                | - | D | D | 150968 | -   | 269 | 150 | -      | 7(7) | 2(2)   | -      | 7(7) | 2(2)   | -   | 6%  | 2% | KRY51468.1 |
|                                                                         | - | - | E |        | -   | -   | 212 | -      | -    | 3(3)   | -      | -    | 3(3)   | -   | -   | 3% |            |
|                                                                         | - | - | G |        | -   | -   | 77  | -      | -    | 1(1)   | -      | -    | 1(1)   | -   | -   | 0% |            |
| Vitellogenin, partial                                                   | C | - | C | 389675 | 81  | -   | 74  | 1(1)   | -    | 2(1)   | 1(1)   | -    | 2(1)   | 0%  | -   | 0% | KRY54946.1 |
|                                                                         | D | D | D |        | 161 | 217 | 83  | 4(4)   | 5(5) | 1(1)   | 4(4)   | 5(5) | 1(1)   | 1%  | 1%  | 0% |            |
|                                                                         | - | - | E |        | -   | -   | 217 | -      | -    | 10(10) | -      | -    | 10(10) | -   | -   | 3% |            |
|                                                                         | - | - | F |        | -   | -   | 293 | -      | -    | 12(11) | -      | -    | 11(10) | -   | -   | 3% |            |
|                                                                         | - | - | G |        | -   | -   | 365 | -      | -    | 15(14) | -      | -    | 15(14) | -   | -   | 4% |            |
| Voltage-dependent calcium channel unc-36                                | - | - | F | 87460  | -   | -   | 81  | -      | -    | 1(1)   | -      | -    | 1(1)   | -   | -   | 1% | KRY55466.1 |
| WD repeat-containing protein 74                                         | - | - | B | 41222  | -   | -   | 65  | -      | -    | 1(1)   | -      | -    | 1(1)   | -   | -   | 1% | KRY47261.1 |
| Xaa-Pro aminopeptidase 1, partial                                       | C | C | - | 74254  | 280 | 278 | -   | 7(7)   | 9(9) | -      | 7(7)   | 8(8) | -      | 15% | 16% | -  | KRY57414.1 |
| Y-box factor -like protein                                              | B | B | B | 34488  | 94  | 136 | 106 | 1(1)   | 2(2) | 1(1)   | 1(1)   | 2(2) | 1(1)   | 6%  | 11% | 6% | KRY49695.1 |
|                                                                         | C | C | - |        | 58  | 68  | -   | 1(1)   | 1(1) | -      | 1(1)   | 1(1) | -      | 6%  | 6%  | -  |            |
| Zygotic DNA replication licensing factor mcm6-B, partial                | D | - | - | 95134  | 80  | -   | -   | 1(1)   | -    | -      | 1(1)   | -    | -      | 1%  | -   | -  | KRY61053.1 |
